# Supplementary material for: Pd(ii)-Catalyzed oxidative dearomatization of indoles: substrate-controlled synthesis of indolines and indolones
Source: Royal Society of Chemistry journal article supplement (doi:10.1039/c6qo00698a), 2016-12-01

## Supporting Information

### **Pd(II)-Catalyzed oxidative dearomatization of indoles: substrate-controlled synthesis of indolines and indolones**

Xinxin Fang, Shang Gao, Zijun Wu, Hequan Yao\* and Aijun Lin\*

*State Key Laboratory of Natural Medicines (SKLNM) and Department of Medicinal Chemistry, School of Pharmacy, China Pharmaceutical University, Nanjing 210009, P. R. China*

\*E-mail: [ajlin@cpu.edu.cn](mailto:ajlin@cpu.edu.cn); [hyao@cpu.edu.cn](mailto:hyao@cpu.edu.cn); [cpuhyao@126.com](mailto:cpuhyao@126.com)

|                                                                                                        |           |
|--------------------------------------------------------------------------------------------------------|-----------|
| <b>1. General information.....</b>                                                                     | <b>1</b>  |
| <b>2. General procedure for the preparation of N-acylindole substrates.....</b>                        | <b>1</b>  |
| <b>3. Characterization of the N-acylindole substrates .....</b>                                        | <b>2</b>  |
| <b>4. General procedure of Pd(II)-catalyzed Wacker cyclization/ dearomatization of indoles .....</b>   | <b>12</b> |
| <b>5. Further functionalization of dearomatized products .....</b>                                     | <b>12</b> |
| <b>6. Optimization for synthesis of indolones .....</b>                                                | <b>15</b> |
| <b>7. General procedure of Pd(II)-catalyzed oxidative dearomatization of 2-substituted indoles ...</b> | <b>16</b> |
| <b>8. Preliminary asymmetric study .....</b>                                                           | <b>16</b> |
| <b>9. Characterization of the dearomatized products .....</b>                                          | <b>19</b> |
| <b>10. NOE analysis of 2n .....</b>                                                                    | <b>29</b> |
| <b>11. Crystal structures of 2q and 4a .....</b>                                                       | <b>31</b> |
| <b>12. <sup>1</sup>H and <sup>13</sup>C NMR spectra of title compounds.....</b>                        | <b>33</b> |

## 1. General information

**Reagents and solvents:** Pd(OAc)<sub>2</sub> and 4,5-diaza-9-fluorenone (DAF) are commercially available. PE refers to petroleum ether b. p. 60-90 °C, EA refers to ethyl acetate and DCM refers to dichloromethane. All other starting materials and solvents were commercially available and were used without further purification unless otherwise stated.

**Chromatography:** Flash column chromatography was carried out using commercially available 200-300 mesh under pressure unless otherwise indicated. Gradient flash chromatography was conducted eluting with PE/EA, they are listed as volume/volume ratios.

**Data collection:** <sup>1</sup>H and <sup>13</sup>C NMR spectra were collected on BRUKER AV-300 (300 MHz) spectrometer using CDCl<sub>3</sub> as solvent. Chemical shifts of <sup>1</sup>H NMR were recorded in parts per million (ppm, δ) relative to tetramethylsilane (δ = 0.00 ppm) with the solvent resonance as an internal standard (CDCl<sub>3</sub>: δ = 7.26 ppm). Data are reported as follows: chemical shift in ppm (δ), multiplicity (s = singlet, d = doublet, t = triplet, q = quartet, brs = broad singlet, m = multiplet), coupling constant (Hz), and integration. Chemical shifts of <sup>13</sup>C NMR were reported in ppm with the solvent as the internal standard (CDCl<sub>3</sub>: δ = 77.16 ppm). High Resolution Mass measurement was performed on Agilent Q-TOF 6520 mass spectrometer with electron spray ionization (ESI) as the ion source. Melting point (m. p.) was measured on a microscopic melting point apparatus.

## 2. General procedure for the preparation of *N*-acylindole substrates

As shown in **Scheme S1**, *N*-acylindole substrates were synthesized from the corresponding phenylhydrazine hydrochlorides as starting materials via Fisher indole synthesis followed by *N*-acylation.

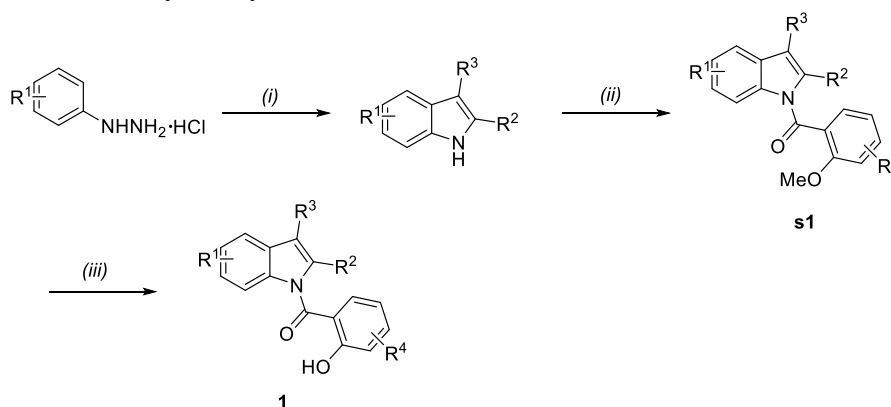

(i) Fisher indole synthesis; (ii) 2-methoxybenzoyl chloride, NaH, DMF; (iii) BBr<sub>3</sub>, DCM.

**Scheme S1.** Preparation of *N*-acylindole substrates

The suspension of substituted phenylhydrazine hydrochloride (40 mmol) in AcOH (40 mL) was heated in 50 °C for 30 min, then butan-2-one (80 mmol, 2 equiv.) was added in one portion and the reaction mixture was refluxed for 3 h. After cooling to room temperature, AcOH was removed under vacuum and the residue was dissolved in EA. The organic phase was washed with water and brine, dried over anhydrous Na<sub>2</sub>SO<sub>4</sub>, and concentrated *in vacuo* to give gray residue, which was purified by flash chromatography on silica gel with PE/EA (*v/v* = 200:1 to 60:1) to afford the 2,3-disubstituted indoles.

To a solution of substituted 2,3-dimethyl-1H-indole (3.0 mmol) in DMF (10 mL) at 0 °C was added NaH (144 mg, 60% dispersion in mineral oil, 3.6 mmol). The reaction was stirred for 30 min, and 2-methoxybenzoyl chloride (0.45 mL, 3.6 mmol) was added slowly at 0 °C. The solution was stirred overnight at room temperature, then quenched with aqueous 6M HCl (20 mL) and extracted with EA (4 x 20 mL). The combined organic layers were dried over anhydrous Na<sub>2</sub>SO<sub>4</sub>, filtered, and concentrated *in vacuo*. The residue was purified by flash chromatography on silica gel with PE/EA (*v/v* = 80:1 to 50:1) to produce **s1** (753 mg, 2.7 mmol, 90%) as a yellow solid.

To a solution of **s1** (3.0 mmol) in CH<sub>2</sub>Cl<sub>2</sub> (10 mL) at 0 °C was added boron tribromide (1.1 mL, 1.0 M solution in DCM, 12 mmol) slowly under argon atmosphere. The solution was stirred overnight at room temperature. The reaction was quenched with cold water (20 mL) and extracted with DCM (50 mL x 3). The combined organic layers were washed with saturated brine, dried with Na<sub>2</sub>SO<sub>4</sub>, concentrated *in vacuo* and purified by flash chromatography on silica gel with PE/EA (*v/v* = 500:1 to 300:1) to afford *N*-acylindole substrate **1**.

### 3. Characterization of the *N*-acylindole substrates

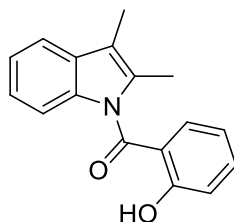

#### *(2,3-dimethyl-1H-indol-1-yl)(2-hydroxyphenyl)methanone (1a)*

Yellow solid, m. p. 66 – 67 °C; <sup>1</sup>H NMR (300 MHz, CDCl<sub>3</sub>) δ 10.59 (s, 1H), 7.67 – 7.28 (m, 3H), 7.28 – 6.94 (m, 4H), 6.94 – 6.71 (m, 1H), 2.37 (s, 3H), 2.24 (s, 3H) ppm; <sup>13</sup>C NMR (75 MHz, CDCl<sub>3</sub>) δ 172.9, 162.1, 136.5, 136.4, 132.9, 130.8, 122.9, 122.4, 119.2, 118.3, 118.3, 116.8, 115.3, 113.4, 12.6, 8.8 ppm. HRMS (ESI) *m/z* calcd for [C<sub>17</sub>H<sub>15</sub>NO<sub>2</sub>-H]<sup>-</sup> 264.1030, found 264.1026.

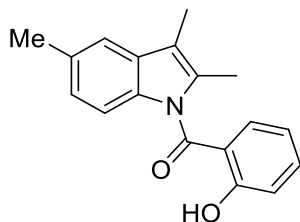

**(2-hydroxyphenyl)(2,3,5-trimethyl-1H-indol-1-yl)methanone (1b)**

Yellow solid, m. p. 84 – 85 °C;  $^1\text{H}$  NMR (300 MHz,  $\text{CDCl}_3$ )  $\delta$  10.80 (s, 1H), 7.64 – 7.58 (m, 2H), 7.42 (s, 1H), 7.29 – 7.26 (m, 1H), 7.18 (d,  $J = 8.4$  Hz, 1H), 7.03 (dd,  $J = 8.5, 1.7$  Hz, 1H), 6.95 (t,  $J = 7.4$  Hz, 1H), 2.60 (s, 3H), 2.55 (s, 3H), 2.39 (s, 3H) ppm;  $^{13}\text{C}$  NMR (75 MHz,  $\text{CDCl}_3$ )  $\delta$  172.7, 162.1, 136.2, 134.9, 133.0, 132.9, 132.0, 131.2, 124.4, 119.2, 118.4, 117.1, 115.3, 113.4, 21.5, 12.7, 8.8 ppm. HRMS (ESI)  $m/z$  calcd for  $[\text{C}_{18}\text{H}_{17}\text{NO}_2+\text{H}]^+$  280.1332, found 280.1332.

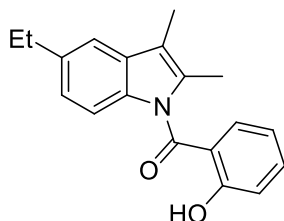

**(5-ethyl-2,3-dimethyl-1H-indol-1-yl)(2-hydroxyphenyl)methanone (1c)**

Yellow liquid;  $^1\text{H}$  NMR (300 MHz,  $\text{CDCl}_3$ )  $\delta$  10.43 (s, 1H), 7.36 – 7.31 (m, 2H), 7.13 (s, 1H), 7.05 – 6.90 (m, 1H), 6.87 (d,  $J = 8.4$  Hz, 1H), 6.76 (dd,  $J = 8.5, 1.8$  Hz, 1H), 6.72 – 6.61 (m, 1H), 2.58 (q,  $J = 7.6$  Hz, 2H), 2.23 (s, 3H), 2.09 (s, 3H), 1.15 (t,  $J = 7.5$  Hz, 3H) ppm;  $^{13}\text{C}$  NMR (75 MHz,  $\text{CDCl}_3$ )  $\delta$  172.7, 162.0, 138.6, 136.2, 134.9, 133.0, 132.9, 131.1, 123.2, 119.2, 118.3, 117.0, 115.4, 113.4, 28.9, 16.3, 12.6, 8.8 ppm. HRMS (ESI)  $m/z$  calcd for  $[\text{C}_{19}\text{H}_{19}\text{NO}_2+\text{H}]^+$  294.1489, found 294.1493.

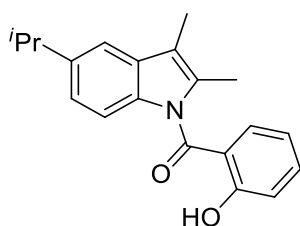

**(2-hydroxyphenyl)(5-isopropyl-2,3-dimethyl-1H-indol-1-yl)methanone (1d)**

Yellow liquid;  $^1\text{H}$  NMR (300 MHz,  $\text{CDCl}_3$ )  $\delta$  10.45 (s, 1H), 7.41 – 7.36 (m, 2H), 7.18 (d,  $J = 1.8$  Hz, 1H), 7.05 – 6.96 (m, 1H), 6.92 (d,  $J = 8.5$  Hz, 1H), 6.84 (dd,  $J = 8.5, 1.8$  Hz, 1H), 6.79 – 6.62 (m, 1H), 3.07 – 2.58 (m, 1H), 2.26 (s, 3H), 2.14 (s, 3H), 1.20 (s, 3H), 1.17 (s, 3H) ppm;  $^{13}\text{C}$  NMR (75 MHz,  $\text{CDCl}_3$ )  $\delta$  172.4, 161.9, 147.7, 136.0, 132.3, 130.2, 122.3, 121.6, 120.0, 117.9, 117.7, 114.3, 113.7, 112.8, 29.3, 21.6, 11.9, 8.2 ppm. HRMS (ESI)  $m/z$  calcd for  $[\text{C}_{20}\text{H}_{21}\text{NO}_2+\text{H}]^+$  308.1645, found 308.1649.

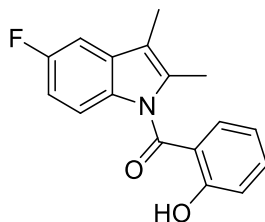

**(5-fluoro-2,3-dimethyl-1H-indol-1-yl)(2-hydroxyphenyl)methanone (1e)**

Yellow solid, m. p. 79 – 80 °C; <sup>1</sup>H NMR (300 MHz, CDCl<sub>3</sub>) δ 10.38 (s, 1H), 7.46 – 7.40 (m, 1H), 7.31 (dd, *J* = 8.0, 1.7 Hz, 1H), 7.10 – 6.82 (m, 3H), 6.82 – 6.56 (m, 2H), 2.27 (s, 3H), 2.11 (s, 3H) ppm; <sup>13</sup>C NMR (75 MHz, CDCl<sub>3</sub>) δ 172.6, 162.0, 160.8, 157.6, 136.5, 134.6, 132.6, 131.7, 119.3, 118.4, 116.6, 114.3, 114.2, 110.7, 110.3, 104.0, 103.7, 12.7, 8.7 ppm. HRMS (ESI) *m/z* calcd for [C<sub>17</sub>H<sub>14</sub>FNO<sub>2</sub>-H]<sup>-</sup> 282.0936, found 282.0933.

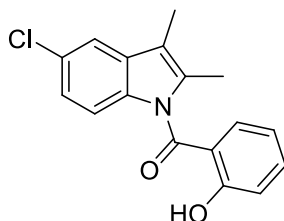

**(5-chloro-2,3-dimethyl-1H-indol-1-yl)(2-hydroxyphenyl)methanone (1f)**

Yellow liquid; <sup>1</sup>H NMR (300 MHz, CDCl<sub>3</sub>) δ 10.36 (brs, 1H), 7.46 – 7.40 (m, 1H), 7.36 – 7.19 (m, 2H), 7.02 (d, *J* = 8.3 Hz, 1H), 6.90 (d, *J* = 1.5 Hz, 2H), 6.75 (t, *J* = 7.6 Hz, 1H), 2.27 (s, 3H), 2.11 (s, 3H) ppm; <sup>13</sup>C NMR (75 MHz, CDCl<sub>3</sub>) δ 172.6, 162.1, 136.6, 134.7, 134.4, 132.6, 132.0, 128.0, 122.9, 119.3, 118.5, 118.0, 116.5, 114.6, 114.3, 12.6, 8.7 ppm. HRMS (ESI) *m/z* calcd for [C<sub>17</sub>H<sub>14</sub>ClNO<sub>2</sub>-H]<sup>-</sup> 298.0640, found 298.0642.

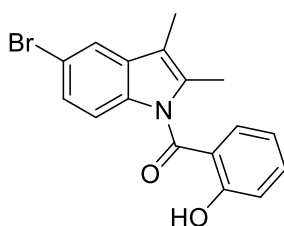

**(5-bromo-2,3-dimethyl-1H-indol-1-yl)(2-hydroxyphenyl)methanone (1g)**

Yellow solid, m. p. 90 – 91 °C; <sup>1</sup>H NMR (300 MHz, CDCl<sub>3</sub>) δ 10.48 (s, 1H), 7.62 – 7.44 (m, 2H), 7.36 (dd, *J* = 8.0, 1.7 Hz, 1H), 7.15 – 7.10 (m, 2H), 6.93 (d, *J* = 8.8 Hz, 1H), 6.88 – 6.76 (m, 1H), 2.36 (s, 3H), 2.19 (s, 3H) ppm; <sup>13</sup>C NMR (75 MHz, CDCl<sub>3</sub>) δ 172.5, 162.2, 136.7, 135.1, 134.2, 132.6, 132.5, 125.5, 121.0, 119.3, 118.5, 116.5, 115.6, 114.7, 114.5, 12.5, 8.7 ppm. HRMS (ESI) *m/z* calcd for [C<sub>17</sub>H<sub>14</sub>BrNO<sub>2</sub>-H]<sup>-</sup> 342.0135, found 342.0130.

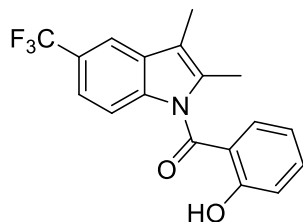

**(2,3-dimethyl-5-(trifluoromethyl)-1H-indol-1-yl)(2-hydroxyphenyl)methanone (1h)**

Yellow solid, m. p. 73 – 74 °C;  $^1\text{H}$  NMR (300 MHz,  $\text{CDCl}_3$ )  $\delta$  10.53 (s, 1H), 7.73 (s, 1H), 7.59 – 7.53 (m, 1H), 7.38 – 7.28 (m, 2H), 7.20 – 6.98 (m, 2H), 6.98 – 6.64 (m, 1H), 2.40 (s, 3H), 2.28 (s, 3H) ppm;  $^{13}\text{C}$  NMR (75 MHz,  $\text{CDCl}_3$ )  $\delta$  172.8, 162.4, 137.8, 137.0, 134.7, 132.6, 130.3, 119.6, 119.6, 119.4, 118.6, 116.3, 115.8, 115.7, 115.0, 113.3, 110.0, 12.4, 8.6 ppm. HRMS (ESI)  $m/z$  calcd for  $[\text{C}_{18}\text{H}_{14}\text{F}_3\text{NO}_2\text{-H}]^-$  332.0904, found 332.0908.

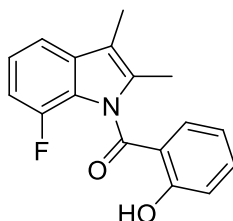

**(7-fluoro-2,3-dimethyl-1H-indol-1-yl)(2-hydroxyphenyl)methanone (1i)**

Yellow solid, m. p. 66 – 67 °C;  $^1\text{H}$  NMR (300 MHz,  $\text{CDCl}_3$ )  $\delta$  10.80 (s, 1H), 7.53 – 7.47 (m, 1H), 7.34 – 7.18 (m, 2H), 7.18 – 6.91 (m, 2H), 6.97 – 6.60 (m, 2H), 2.33 (s, 3H), 2.25 (s, 3H) ppm;  $^{13}\text{C}$  NMR (75 MHz,  $\text{CDCl}_3$ )  $\delta$  174.0, 162.4, 150.8, 147.5, 136.8, 133.8, 131.9, 131.9, 122.5, 122.4, 119.3, 118.2, 114.2, 114.2, 113.5, 109.6, 109.4, 11.8, 8.9 ppm. HRMS (ESI)  $m/z$  calcd for  $[\text{C}_{17}\text{H}_{14}\text{FNO}_2\text{-H}]^-$  282.0936, found 282.0935.

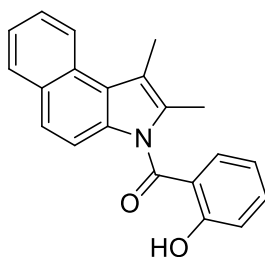

**(1,2-dimethyl-3H-benzo[e]indol-3-yl)(2-hydroxyphenyl)methanone (1j)**

Yellow solid, m. p. 120 – 121 °C;  $^1\text{H}$  NMR (300 MHz,  $\text{CDCl}_3$ )  $\delta$  10.79 (s, 1H), 8.53 (d,  $J$  = 8.4 Hz, 1H), 7.87 (d,  $J$  = 8.1 Hz, 1H), 7.68 – 7.39 (m, 4H), 7.35 (dd,  $J$  = 8.0, 1.7 Hz, 1H), 7.30 – 7.20 (m, 1H), 7.14 (d,  $J$  = 8.4 Hz, 1H), 6.81 (t,  $J$  = 7.6 Hz, 1H), 2.67 (s, 3H), 2.43 (s, 3H) ppm;  $^{13}\text{C}$  NMR (75 MHz,  $\text{CDCl}_3$ )  $\delta$  173.6, 162.6, 136.8, 133.2, 131.2, 130.6, 128.7, 128.5, 126.0, 123.9, 123.6, 123.5, 119.4, 118.4, 116.8, 116.2, 113.8, 12.9, 12.1 ppm. HRMS (ESI)  $m/z$  calcd for  $[\text{C}_{21}\text{H}_{17}\text{NO}_2\text{-H}]^-$  314.1187, found 314.1180.

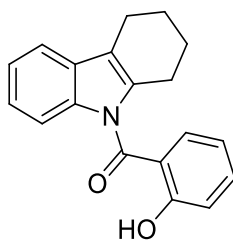

**(3,4-dihydro-1H-carbazol-9(2H)-yl)(2-hydroxyphenyl)methanone (1k)**

Yellow liquid;  $^1\text{H}$  NMR (300 MHz,  $\text{CDCl}_3$ )  $\delta$  10.56 (s, 1H), 7.60 – 7.53 (m, 3H), 7.39 (d,  $J$  = 8.2 Hz, 1H), 7.31 (t,  $J$  = 7.2 Hz, 1H), 7.33 – 7.28 (m, 2H), 6.93 (t,  $J$  = 7.6 Hz, 1H), 3.39 – 2.44 (m, 4H), 1.99 (m, 4H) ppm;  $^{13}\text{C}$  NMR (75 MHz,  $\text{CDCl}_3$ )  $\delta$  172.0, 161.7, 136.7, 136.1, 132.7, 130.1, 123.2, 122.7, 119.2, 118.3, 118.1, 118.0, 117.1, 114.1, 25.2, 23.6, 22.5, 21.2 ppm. HRMS (ESI)  $m/z$  calcd for  $[\text{C}_{19}\text{H}_{17}\text{NO}_2+\text{Na}]^+$  314.1151, found 314.1157.

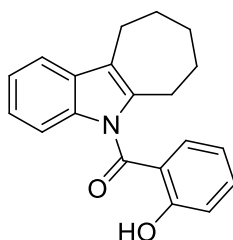

**(2-hydroxyphenyl)(7,8,9,10-tetrahydrocyclohepta[b]indol-5(6H)-yl)methanone (1l)**

Yellow liquid;  $^1\text{H}$  NMR (300 MHz,  $\text{CDCl}_3$ )  $\delta$  10.65 (s, 1H), 7.51 – 7.24 (m, 3H), 7.16 – 7.06 (m, 2H), 7.05 – 6.89 (m, 2H), 6.75 (t,  $J$  = 7.6 Hz, 1H), 2.86 – 2.53 (m, 4H), 1.89 – 1.67 (m, 4H), 1.66 – 1.60 (m, 2H) ppm;  $^{13}\text{C}$  NMR (75 MHz,  $\text{CDCl}_3$ )  $\delta$  173.3, 162.3, 139.3, 136.5, 136.0, 132.8, 130.2, 122.9, 122.3, 122.1, 119.3, 118.3, 117.9, 117.2, 113.2, 31.3, 28.6, 27.3, 27.0, 24.1 ppm. HRMS (ESI)  $m/z$  calcd for  $[\text{C}_{20}\text{H}_{19}\text{NO}_2-\text{H}]^-$  304.1343, found 304.1336.

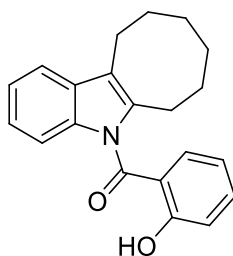

**(6,7,8,9,10,11-hexahydro-5H-cycloocta[b]indol-5-yl)(2-hydroxyphenyl)methanone (1m)**

Yellow solid, m. p. 128 – 129 °C;  $^1\text{H}$  NMR (300 MHz,  $\text{CDCl}_3$ )  $\delta$  10.65 (s, 1H), 7.58 – 7.32 (m, 3H), 7.26 – 7.09 (m, 2H), 7.09 – 6.91 (m, 2H), 6.82 (t,  $J$  = 7.6 Hz, 1H), 3.21 – 2.96 (m, 1H), 2.96 – 2.43 (m, 3H), 1.97 – 1.60 (m, 4H), 1.56 – 1.29 (m, 4H) ppm;  $^{13}\text{C}$  NMR (75 MHz,  $\text{CDCl}_3$ )  $\delta$  172.9, 162.2, 137.6, 136.7, 136.4, 132.8, 129.6, 122.6, 122.2, 120.4, 119.3, 118.4, 118.1, 116.7, 113.6, 29.9, 29.8, 26.5, 25.8, 24.2, 22.8 ppm. HRMS (ESI)  $m/z$  calcd for  $[\text{C}_{21}\text{H}_{21}\text{NO}_2-\text{H}]^-$  318.1500, found 318.1489.

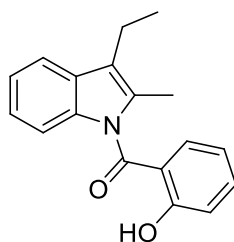

**(3-ethyl-2-methyl-1H-indol-1-yl)(2-hydroxyphenyl)methanone (1n)**

Yellow liquid;  $^1\text{H}$  NMR (300 MHz,  $\text{CDCl}_3$ )  $\delta$  10.49 (s, 1H), 7.40 – 7.31 (m, 3H), 7.15 – 6.81 (m, 4H), 6.81 – 6.16 (m, 1H), 2.60 (q,  $J = 7.5$  Hz, 2H), 2.26 (s, 3H), 1.13 (t,  $J = 7.5$  Hz, 3H) ppm;  $^{13}\text{C}$  NMR (75 MHz,  $\text{CDCl}_3$ )  $\delta$  173.0, 162.1, 136.7, 136.4, 132.9, 132.4, 129.9, 122.8, 122.3, 121.6, 119.3, 118.4, 116.9, 113.6, 17.4, 14.7, 12.4 ppm. HRMS (ESI)  $m/z$  calcd for  $[\text{C}_{18}\text{H}_{17}\text{NO}_2+\text{H}]^+$  280.1332, found 280.1338.

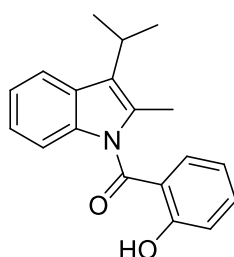

**(2-hydroxyphenyl)(3-isopropyl-2-methyl-1H-indol-1-yl)methanone (1o)**

Yellow solid, m. p. 61 – 62 °C;  $^1\text{H}$  NMR (300 MHz,  $\text{CDCl}_3$ )  $\delta$  10.88 (s, 1H), 7.84 (d,  $J = 7.9$  Hz, 1H), 7.61 (t,  $J = 8.4$  Hz, 2H), 7.39 – 7.23 (m, 3H), 7.23 – 7.10 (m, 1H), 6.94 (t,  $J = 7.6$  Hz, 1H), 3.59 – 2.87 (m, 1H), 2.56 (s, 3H), 1.63 (d,  $J = 7.3$  Hz, 6H) ppm;  $^{13}\text{C}$  NMR (75 MHz,  $\text{CDCl}_3$ )  $\delta$  173.3, 162.4, 137.1, 136.6, 133.0, 131.5, 128.8, 125.1, 122.6, 122.1, 120.0, 119.3, 118.5, 117.0, 113.7, 26.0, 22.4, 12.8 ppm. HRMS (ESI)  $m/z$  calcd for  $[\text{C}_{19}\text{H}_{19}\text{NO}_2+\text{H}]^+$  294.1489, found 294.1495.

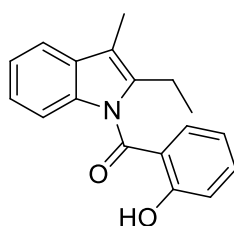

**(2-ethyl-3-methyl-1H-indol-1-yl)(2-hydroxyphenyl)methanone (1p)**

Yellow solid, m. p. 66 – 67 °C;  $^1\text{H}$  NMR (300 MHz,  $\text{CDCl}_3$ )  $\delta$  10.64 (s, 1H), 7.59 – 7.36 (m, 3H), 7.27 – 7.08 (m, 2H), 7.06 – 7.00 (m, 1H), 6.95 (d,  $J = 8.2$  Hz, 1H), 6.90 – 6.72 (m, 1H), 3.06 – 3.03 (m, 1H), 2.78 – 2.73 (m, 1H), 2.27 (s, 3H), 1.15 (t,  $J = 7.5$  Hz, 3H) ppm;  $^{13}\text{C}$  NMR (75 MHz,  $\text{CDCl}_3$ )  $\delta$  173.2, 162.2, 139.3, 136.5, 132.8, 130.7, 122.8, 122.2, 119.3, 118.4, 118.4, 116.7, 114.5, 113.3, 18.9, 14.3, 8.6 ppm. HRMS (ESI)  $m/z$  calcd for  $[\text{C}_{18}\text{H}_{17}\text{NO}_2-\text{H}]^-$  278.1187, found 278.1191.



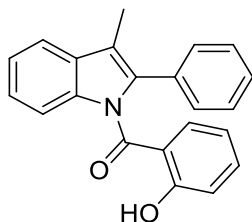

**(2-hydroxyphenyl)(3-methyl-2-phenyl-1H-indol-1-yl)methanone (1q)**

Yellow solid, m. p. 110 – 111 °C;  $^1\text{H}$  NMR (300 MHz,  $\text{CDCl}_3$ )  $\delta$  10.32 (s, 1H), 7.56 – 7.42 (m, 1H), 7.51 – 7.48 (m, 2H), 7.29 – 6.98 (m, 8H), 6.85 (dd,  $J = 8.4, 1.1$  Hz, 1H), 6.64 – 6.53 (m, 1H), 2.25 (s, 3H) ppm;  $^{13}\text{C}$  NMR (75 MHz,  $\text{CDCl}_3$ )  $\delta$  173.3, 161.9, 137.1, 136.4, 136.2, 132.6, 132.3, 130.8, 129.4, 128.4, 127.6, 124.4, 122.9, 119.3, 119.1, 117.9, 117.1, 116.9, 113.4, 9.5 ppm. HRMS (ESI)  $m/z$  calcd for  $[\text{C}_{22}\text{H}_{17}\text{NO}_2\text{-H}]^-$  326.1187, found 326.1184.

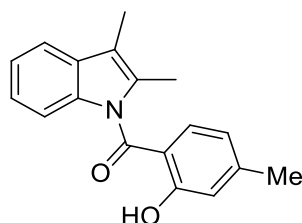

**(2,3-dimethyl-1H-indol-1-yl)(2-hydroxy-4-methylphenyl)methanone (1r)**

Yellow solid, m. p. 91 – 92 °C;  $^1\text{H}$  NMR (300 MHz,  $\text{CDCl}_3$ )  $\delta$  10.62 (s, 1H), 7.36 (d,  $J = 7.7$  Hz, 1H), 7.23 (d,  $J = 8.1$  Hz, 1H), 7.12 – 6.92 (m, 3H), 6.83 (d,  $J = 1.7$  Hz, 1H), 6.55 (dd,  $J = 8.2, 1.6$  Hz, 1H), 2.34 (s, 3H), 2.31 (s, 3H), 2.15 (s, 3H) ppm;  $^{13}\text{C}$  NMR (75 MHz,  $\text{CDCl}_3$ )  $\delta$  172.9, 162.5, 148.2, 136.6, 132.9, 132.8, 130.8, 122.9, 122.2, 120.5, 118.5, 118.3, 114.9, 114.4, 113.4, 22.1, 12.4, 8.8 ppm. HRMS (ESI)  $m/z$  calcd for  $[\text{C}_{18}\text{H}_{17}\text{NO}_2\text{+H}]^+$  280.1332, found 280.1339.

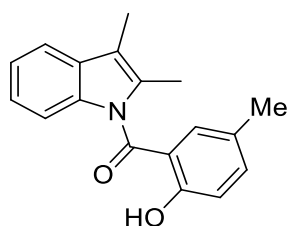

**(2,3-dimethyl-1H-indol-1-yl)(2-hydroxy-5-methylphenyl)methanone (1s)**

Yellow solid, m. p. 61 – 62 °C;  $^1\text{H}$  NMR (300 MHz,  $\text{CDCl}_3$ )  $\delta$  10.23 (s, 1H), 7.30 (d,  $J = 7.7$  Hz, 1H), 7.22 – 7.07 (m, 2H), 7.07 – 6.96 (m, 2H), 6.96 – 6.82 (m, 2H), 2.23 (s, 3H), 2.10 (s, 3H), 2.02 (s, 3H) ppm;  $^{13}\text{C}$  NMR (75 MHz,  $\text{CDCl}_3$ )  $\delta$  172.9, 160.0, 137.4, 136.6, 132.9, 132.4, 130.8, 128.5, 123.0, 122.4, 118.3, 118.2, 116.6, 115.2, 113.4, 20.3, 12.6, 8.8 ppm. HRMS (ESI)  $m/z$  calcd for  $[\text{C}_{18}\text{H}_{17}\text{NO}_2\text{+H}]^+$  280.1332, found 280.1338.

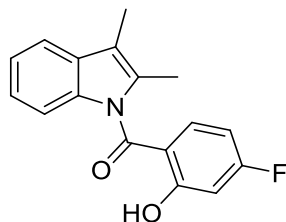

**(2,3-dimethyl-1H-indol-1-yl)(4-fluoro-2-hydroxyphenyl)methanone (1t)**

Yellow solid, m. p. 66 – 67 °C; <sup>1</sup>H NMR (300 MHz, CDCl<sub>3</sub>) δ 10.88 (s, 1H), 7.43 – 7.29 (m, 2H), 7.09 – 7.04 (m, 1H), 7.00 – 6.83 (m, 2H), 6.69 (dd, *J* = 10.2, 2.6 Hz, 1H), 6.51 – 6.37 (m, 1H), 2.27 (s, 4H), 2.13 (s, 3H) ppm; <sup>13</sup>C NMR (75 MHz, CDCl<sub>3</sub>) δ 172.2, 169.3, 165.9, 164.7, 164.6, 136.4, 135.4, 135.2, 132.8, 130.8, 123.0, 122.4, 118.4, 115.4, 113.2, 107.7, 107.4, 105.4, 105.1, 12.4, 8.7 ppm. HRMS (ESI) *m/z* calcd for [C<sub>17</sub>H<sub>14</sub>FNO<sub>2</sub>-H]<sup>-</sup> 282.0936, found 282.0938.

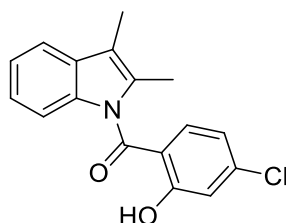

**(4-chloro-2-hydroxyphenyl)(2,3-dimethyl-1H-indol-1-yl)methanone (1u)**

Yellow solid, m. p. 80 – 81 °C; <sup>1</sup>H NMR (300 MHz, CDCl<sub>3</sub>) δ 10.32 (s, 1H), 7.45 – 7.27 (m, 3H), 7.22 – 7.08 (m, 1H), 7.08 – 7.01 (m, 2H), 6.98 (d, *J* = 8.6 Hz, 1H), 2.27 (s, 3H), 2.16 (s, 3H) ppm; <sup>13</sup>C NMR (75 MHz, CDCl<sub>3</sub>) δ 171.6, 160.4, 136.1, 132.5, 131.7, 130.9, 124.1, 123.4, 122.8, 119.9, 118.4, 116.0, 113.3, 12.7, 8.8 ppm. HRMS (ESI) *m/z* calcd for [C<sub>17</sub>H<sub>14</sub>ClNO<sub>2</sub>+H]<sup>+</sup> 345.1155, found 345.1156.

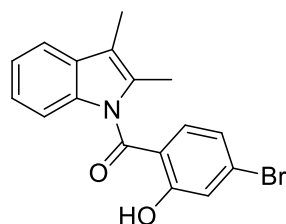

**(4-bromo-2-hydroxyphenyl)(2,3-dimethyl-1H-indol-1-yl)methanone (1v)**

Yellow solid, m. p. 60 – 61 °C; <sup>1</sup>H NMR (300 MHz, CDCl<sub>3</sub>) δ 10.60 (s, 1H), 7.32 (d, *J* = 7.7 Hz, 1H), 7.25 – 7.12 (m, 2H), 7.09 – 7.03 (m, 1H), 7.00 – 6.88 (m, 2H), 6.84 (dd, *J* = 8.5, 1.9 Hz, 1H), 2.25 (s, 3H), 2.12 (s, 3H) ppm; <sup>13</sup>C NMR (75 MHz, CDCl<sub>3</sub>) δ 172.6, 162.6, 143.3, 137.5, 136.1, 132.4, 119.6, 118.8, 118.2, 115.9, 115.4, 114.8, 113.0, 12.5, 8.7 ppm. HRMS (ESI) *m/z* calcd for [C<sub>17</sub>H<sub>14</sub>BrNO<sub>2</sub>-H]<sup>-</sup> 342.0135, found 342.0136.

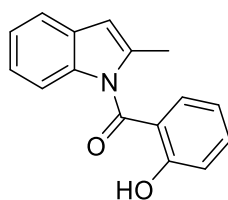

**(2-hydroxyphenyl)(2-methyl-1H-indol-1-yl)methanone (3a)**

Yellow solid, m. p. 54 – 55 °C; <sup>1</sup>H NMR (300 MHz, CDCl<sub>3</sub>) δ 10.39 (s, 1H), 7.31 (d, *J* = 8.0 Hz, 2H), 7.25 (d, *J* = 8.1 Hz, 1H), 7.04 – 6.80 (m, 4H), 6.63 (t, *J* = 7.6 Hz, 1H), 6.28 (s, 1H), 2.29 (s, 3H) ppm; <sup>13</sup>C NMR (75 MHz, CDCl<sub>3</sub>) δ 171.9, 161.0, 136.4, 136.1, 135.4, 131.6, 128.3, 121.6, 121.4, 118.8, 118.1, 117.2, 115.4, 112.3, 107.3, 13.8 ppm. HRMS (ESI) *m/z* calcd for [C<sub>16</sub>H<sub>13</sub>NO<sub>2</sub>+H]<sup>+</sup> 252.0887, found 252.0881.

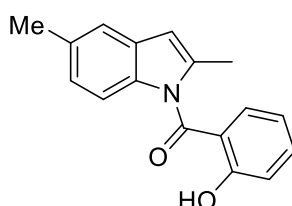

**(2,5-dimethyl-1H-indol-1-yl)(2-hydroxyphenyl)methanone (3b)**

Yellow solid, m. p. 70 – 71 °C; <sup>1</sup>H NMR (300 MHz, CDCl<sub>3</sub>) δ 10.39 (s, 1H), 7.36 – 7.28 (m, 2H), 7.12 (s, 1H), 7.02 – 6.92 (m, 1H), 6.83 (d, *J* = 8.5 Hz, 1H), 6.78 – 6.62 (m, 2H), 6.23 (s, 1H), 2.31 (s, 3H), 2.25 (s, 3H) ppm; <sup>13</sup>C NMR (75 MHz, CDCl<sub>3</sub>) δ 172.5, 161.6, 137.2, 136.0, 135.1, 132.3, 131.6, 129.3, 123.6, 119.5, 118.7, 117.9, 116.2, 112.8, 107.9, 20.8, 14.6 ppm. HRMS (ESI) *m/z* calcd for [C<sub>17</sub>H<sub>15</sub>NO<sub>2</sub>+H]<sup>+</sup> 266.1093, found 266.1090.

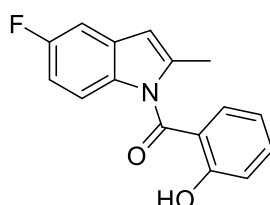

**(5-fluoro-2-methyl-1H-indol-1-yl)(2-hydroxyphenyl)methanone (3c)**

Yellow liquid; <sup>1</sup>H NMR (300 MHz, CDCl<sub>3</sub>) δ 10.26 (s, 1H), 7.36 – 7.31 (m, 1H), 7.19 (dd, *J* = 8.0, 1.7 Hz, 1H), 6.96 – 6.92 (m, 2H), 6.86 (dd, *J* = 9.0, 4.4 Hz, 1H), 6.74 – 6.52 (m, 2H), 6.22 (s, 1H), 2.26 (s, 3H) ppm; <sup>13</sup>C NMR (75 MHz, CDCl<sub>3</sub>) δ 172.7, 162.2, 160.8, 157.6, 139.3, 136.8, 133.6, 132.6, 130.4, 130.3, 119.4, 118.5, 116.4, 114.4, 114.3, 110.6, 110.3, 108.2, 108.2, 105.6, 105.3, 15.0 ppm. HRMS (ESI) *m/z* calcd for [C<sub>16</sub>H<sub>12</sub>FNO<sub>2</sub>+H]<sup>+</sup> 270.0802, found 270.0804.

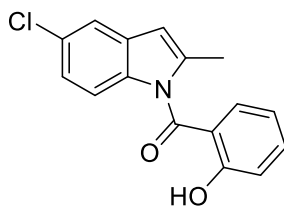

**(5-chloro-2-methyl-1H-indol-1-yl)(2-hydroxyphenyl)methanone (3d)**

Yellow liquid;  $^1\text{H}$  NMR (300 MHz,  $\text{CDCl}_3$ )  $\delta$  10.29 (s, 1H), 7.48 – 7.30 (m, 1H), 7.26 (s, 1H), 7.23 – 7.12 (m, 1H), 6.97 (d,  $J = 8.4$  Hz, 1H), 6.83 (s, 2H), 6.68 (t,  $J = 7.6$  Hz, 1H), 6.22 (s, 1H), 2.29 (s, 3H) ppm;  $^{13}\text{C}$  NMR (75 MHz,  $\text{CDCl}_3$ )  $\delta$  172.2, 161.8, 138.6, 136.4, 135.1, 132.1, 130.1, 127.6, 122.3, 119.1, 118.9, 118.1, 115.7, 113.9, 107.1, 14.5 ppm. HRMS (ESI)  $m/z$  calcd for  $[\text{C}_{16}\text{H}_{12}\text{ClNO}_2+\text{H}]^+$  286.0507, found 286.0510.

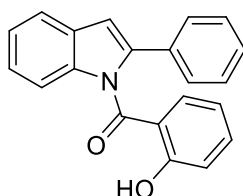

**(2-hydroxyphenyl)(2-methyl-1H-indol-1-yl)methanone (3e)**

Yellow solid, m. p. 129 – 130 °C;  $^1\text{H}$  NMR (300 MHz,  $\text{CDCl}_3$ )  $\delta$  10.45 (s, 1H), 7.57 – 7.45 (m, 1H), 7.38 – 7.34 (m, 1H), 7.33 – 7.20 (m, 4H), 7.18 – 7.06 (m, 5H), 6.89 (d,  $J = 8.3$  Hz, 1H), 6.72 (s, 1H), 6.56 (t,  $J = 7.6$  Hz, 1H) ppm;  $^{13}\text{C}$  NMR (75 MHz,  $\text{CDCl}_3$ )  $\delta$  173.8, 162.3, 141.3, 138.2, 136.7, 132.6, 129.5, 128.6, 127.9, 127.9, 124.2, 123.1, 121.0, 119.3, 118.0, 116.8, 113.3, 109.4 ppm. HRMS (ESI)  $m/z$  calcd for  $[\text{C}_{21}\text{H}_{15}\text{NO}_2+\text{H}]^+$  314.1093, found 314.1090.

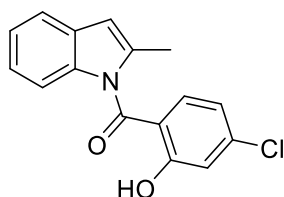

**(4-chloro-2-hydroxyphenyl)(2-methyl-1H-indol-1-yl)methanone (3f)**

Yellow solid, m. p. 134 – 135 °C;  $^1\text{H}$  NMR (300 MHz,  $\text{CDCl}_3$ )  $\delta$  10.29 (s, 1H), 7.45 – 7.35 (m, 2H), 7.33 (d,  $J = 2.8$  Hz, 1H), 7.15 – 6.98 (m, 4H), 6.39 (s, 1H), 2.36 (s, 3H) ppm;  $^{13}\text{C}$  NMR (75 MHz,  $\text{CDCl}_3$ )  $\delta$  171.9, 160.5, 137.3, 136.4, 131.6, 129.5, 124.2, 123.1, 123.0, 120.2, 120.0, 117.5, 113.4, 109.1, 15.1 ppm. HRMS (ESI)  $m/z$  calcd for  $[\text{C}_{16}\text{H}_{12}\text{ClNO}_2+\text{H}]^+$  286.0501, found 286.0510.

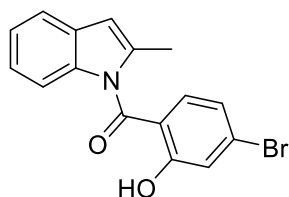

**(4-bromo-2-hydroxyphenyl)(2-methyl-1H-indol-1-yl)methanone (3g)**

Yellow solid, m. p. 95 – 96 °C; <sup>1</sup>H NMR (300 MHz, CDCl<sub>3</sub>) δ 10.56 (s, 1H), 7.36 (d, *J* = 7.7 Hz, 1H), 7.24 – 7.12 (m, 2H), 7.06 – 7.01 (m, 1H), 6.99 – 6.90 (m, 2H), 6.86 (dd, *J* = 8.5, 1.9 Hz, 1H), 6.34 (s, 1H), 2.35 (s, 3H) ppm; <sup>13</sup>C NMR (75 MHz, CDCl<sub>3</sub>) δ 172.0, 162.1, 137.0, 136.6, 133.2, 130.7, 129.0, 122.4, 122.4, 122.3, 121.3, 119.7, 114.9, 112.9, 108.3, 14.5 ppm. HRMS (ESI) *m/z* calcd for [C<sub>16</sub>H<sub>12</sub>BrNO<sub>2</sub>+H]<sup>+</sup> 330.0017, found 330.0015.

**4. General procedure of Pd(II)-catalyzed Wacker cyclization/dearomatization of indoles**

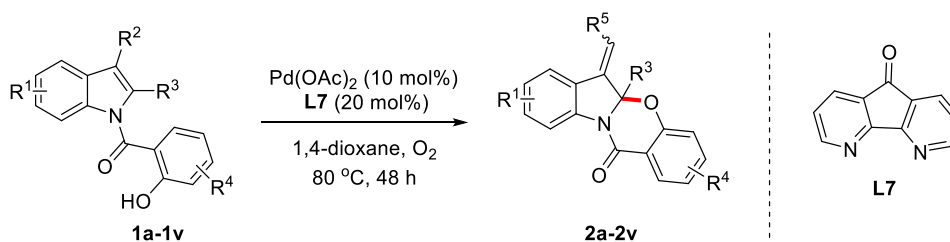

A sealed tube was charged with *N*-acylindole substrate **1** (0.2 mmol, 1 equiv.), Pd(OAc)<sub>2</sub> (0.02 mmol, 10 mol%), ligand (0.04 mmol, 20 mol%), and 1,4-dioxane (2 mL) under O<sub>2</sub> atmosphere. The reaction mixture was vigorously stirred at 80 °C (oil temperature) for 48 h. After cooling to room temperature, the reaction mixture was diluted with EA (10 mL) and filtered through a plug of Celite. The filtrate was washed with water and brine, dried over anhydrous Na<sub>2</sub>SO<sub>4</sub>, and concentrated *in vacuo* to give dark residue, which was purified by flash chromatography on silica gel with PE/EA (*v/v* = 300:1 to 100:1, TLC: R<sub>f</sub> = 0.2 – 0.6, PE/EA = 20:1) to afford dearomatized product **2**.

**5. Further functionalization of dearomatized products**

**5.1 Transformation of C3-*exo* double bonds**

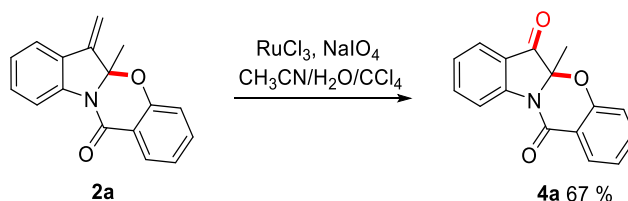

A sealed tube was charged with **2a** (0.2 mmol, 1 equiv.), RuCl<sub>3</sub> (0.006 mmol, 3 mol%), NaIO<sub>4</sub> (1.2 mmol, 6 equiv.), and CH<sub>3</sub>CN/H<sub>2</sub>O/CCl<sub>4</sub> (2 mL, v/v/v = 1.6:1:1) at room temperature for 1 h. The reaction mixture was diluted with EA (10 mL), quenched with aqueous sodium thiosulfate and filtered through a plug of Celite. The filtrate was washed with water and brine, dried over anhydrous Na<sub>2</sub>SO<sub>4</sub>, and concentrated *in vacuo* to give dark residue, which was purified by flash chromatography on silica gel with PE/EA (v/v = 50:1 to 20:1, TLC: R<sub>f</sub> = 0.3, PE/EA = 20:1) to afford **4a**.

#### **5a-methyl-5aH-benzo[5,6][1,3]oxazino[3,2-a]indole-6,12-dione (4a)**

35.5 mg, 67% yield, pale yellow solid, m. p. 117 – 118 °C; <sup>1</sup>H NMR (300 MHz, CDCl<sub>3</sub>) δ 8.32 (d, *J* = 8.3 Hz, 1H), 7.96 (dd, *J* = 7.7, 1.7 Hz, 1H), 7.82 – 7.71 (m, 1H), 7.67 – 7.63 (m, 1H), 7.53 – 7.35 (m, 1H), 7.27 – 7.14 (m, 1H), 7.14 – 6.90 (m, 2H), 1.60 (s, 3H) ppm; <sup>13</sup>C NMR (75 MHz, CDCl<sub>3</sub>) δ 193.6, 157.7, 155.5, 150.0, 138.5, 135.3, 128.5, 125.2, 125.0, 123.4, 120.8, 118.2, 118.1, 117.2, 90.7, 20.5 ppm. HRMS (ESI) *m/z* calcd for [C<sub>16</sub>H<sub>11</sub>NO<sub>3</sub>+H]<sup>+</sup> 266.0812, found 266.0811.

### 5.2 Cross coupling of **2g** with phenylboronic acid

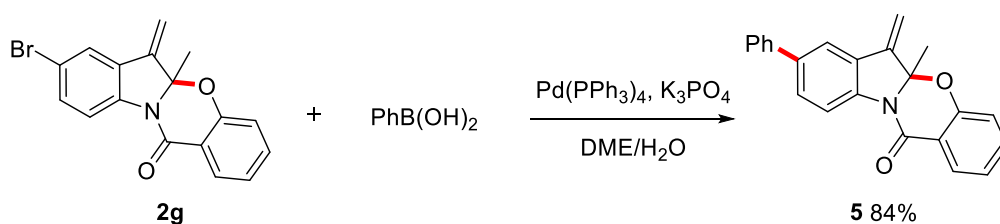

A sealed tube was charged with **2g** (0.2 mmol, 1 equiv.), phenylboronic acid (0.24 mmol, 1.2 equiv.), Pd(PPh<sub>3</sub>)<sub>4</sub> (0.004 mmol, 2 mol%), K<sub>3</sub>PO<sub>4</sub> (0.4 mmol, 2 equiv.), and DME/H<sub>2</sub>O (2 mL, v/v = 4:1) under argon atmosphere at 65 °C for 8 h. The reaction mixture was diluted with EA (10 mL) and filtered through a plug of Celite. The filtrate was washed with water and brine, dried over anhydrous Na<sub>2</sub>SO<sub>4</sub>, and concentrated *in vacuo* to give dark residue, which was purified by flash chromatography on silica gel with PE/EA (v/v = 200:1 to 150:1, TLC: R<sub>f</sub> = 0.5, PE/EA = 20:1) to afford **5**.

#### **5a-methyl-6-methylene-8-phenyl-5aH-benzo[5,6][1,3]oxazino[3,2-a]indol-12(6H)-one (5)**

57.0 mg, 84% yield, white solid, m. p. 102 – 103 °C; <sup>1</sup>H NMR (300 MHz, CDCl<sub>3</sub>) δ 8.28 (d, *J* = 8.4 Hz, 1H), 8.10 (dd, *J* = 7.8, 1.7 Hz, 1H), 7.77 (d, *J* = 1.9 Hz, 1H), 7.63 – 7.57 (m, 3H), 7.55 – 7.43 (m, 3H), 7.37 (d, *J* = 7.2 Hz, 1H), 7.18 (t, *J* = 7.6 Hz, 1H), 7.10 (d, *J* = 8.2 Hz, 1H), 5.84 (s, 1H), 5.58 (s, 1H), 1.67 (s, 3H) ppm; <sup>13</sup>C NMR (75 MHz, CDCl<sub>3</sub>) δ 157.9, 155.1, 146.5, 140.6, 140.5, 137.8, 134.7, 129.9, 128.8, 128.3, 127.3, 127.0, 126.4, 122.8, 119.6, 118.8, 117.6, 116.5, 106.2, 95.7, 25.5 ppm. HRMS (ESI) *m/z* calcd for [C<sub>23</sub>H<sub>17</sub>NO<sub>2</sub>+Na]<sup>+</sup> 362.1152, found 362.1151.

### 5.3 Cross coupling of **2v** with phenylacetylene

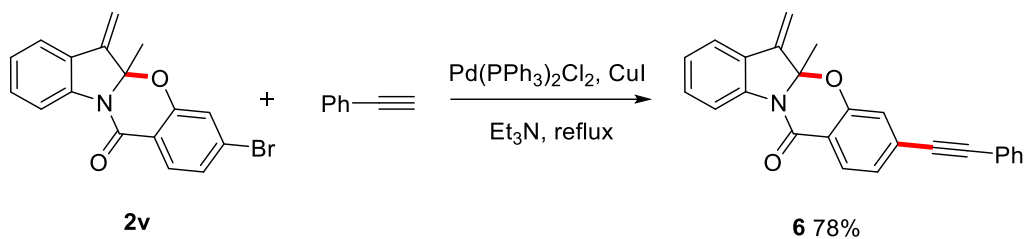

A sealed tube was charged with **2v** (0.2 mmol, 1 equiv.), Pd(PPh<sub>3</sub>)<sub>2</sub>Cl<sub>2</sub> (0.004 mmol, 2 mol%), CuI (0.008 mmol, 4 mol%), phenylacetylene (0.4 mmol, 2 equiv.), and Et<sub>3</sub>N (2 mL). The reaction mixture was then vigorously stirred under argon atmosphere at 90 °C (oil temperature) for 4 h. After cooling to room temperature, the reaction mixture was diluted with EA (20 mL) and filtered through a plug of celite. The mixture was concentrated *in vacuo* and purified by flash chromatography on silica gel with PE/EA (v/v = 300:1 to 100:1, TLC: R<sub>f</sub> = 0.4, PE/EA = 20:1) to afford the desired product **6**.

#### **5a-methyl-6-methylene-3-(phenylethynyl)-5aH-benzo[5,6][1,3]oxazino[3,2-a]indol-12(6H)-one (6)**

56.6 mg, 78% yield, yellow solid, m. p. 129 – 130 °C; <sup>1</sup>H NMR (300 MHz, CDCl<sub>3</sub>) δ 8.22 (d, *J* = 8.1 Hz, 1H), 8.04 (d, *J* = 8.0 Hz, 1H), 7.57 – 7.53 (m, 3H), 7.40 – 7.30 (m, 5H), 7.27 – 7.20 (m, 1H), 7.15 (t, *J* = 7.5 Hz, 1H), 5.78 (s, 1H), 5.54 (s, 1H), 1.68 (s, 3H) ppm; <sup>13</sup>C NMR (75 MHz, CDCl<sub>3</sub>) δ 157.4, 154.9, 146.4, 141.1, 131.8, 130.8, 129.7, 128.9, 128.4, 128.2, 126.0, 125.8, 124.5, 122.5, 121.0, 120.4, 118.4, 116.3, 106.1, 95.6, 92.7, 88.3, 25.5 ppm. HRMS (ESI) *m/z* calcd for [C<sub>25</sub>H<sub>17</sub>NO<sub>2</sub>+H]<sup>+</sup> 364.1332, found 364.1336.

## 6. Optimization for synthesis of indolones

**Table S1 Screening of reaction conditions<sup>a,b</sup>**

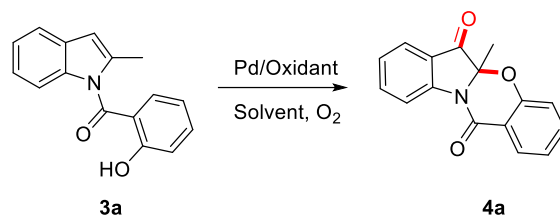

| Entry           | Cat.                                               | Oxidant              | Solvent<br>(2 mL) | T<br>(°C) | Yield<br>(%) <sup>b</sup> |
|-----------------|----------------------------------------------------|----------------------|-------------------|-----------|---------------------------|
| 1               | Pd(OAc) <sub>2</sub>                               | <i>p</i> -BQ         | DMF               | 80        | trace                     |
| 2               | Pd(OAc) <sub>2</sub>                               | CuCl                 | DMF               | 80        | 48                        |
| 3               | PdCl <sub>2</sub>                                  | CuCl                 | DMF               | 80        | 48                        |
| 4               | Pd(PPh <sub>3</sub> ) <sub>2</sub> Cl <sub>2</sub> | CuCl                 | DMF               | 80        | 44                        |
| 5               | Pd(dppf)Cl <sub>2</sub>                            | CuCl                 | DMF               | 80        | 45                        |
| 6               | Pd(OAc) <sub>2</sub>                               | CuCl <sub>2</sub>    | DMF               | 80        | 47                        |
| 7               | Pd(OAc) <sub>2</sub>                               | CuBr                 | DMF               | 80        | trace                     |
| 8               | Pd(OAc) <sub>2</sub>                               | Cu(OAc) <sub>2</sub> | DMF               | 80        | 35                        |
| 9               | Pd(OAc) <sub>2</sub>                               | AgSbF <sub>6</sub>   | DMF               | 80        | 36                        |
| 10              | Pd(OAc) <sub>2</sub>                               | CuCl                 | DME               | 80        | 68                        |
| 11              | Pd(OAc) <sub>2</sub>                               | CuCl                 | THF               | 80        | 56                        |
| 12              | Pd(OAc) <sub>2</sub>                               | CuCl                 | DMA               | 80        | 31                        |
| 13              | Pd(OAc) <sub>2</sub>                               | CuCl                 | MeOH              | 80        | 39                        |
| 14              | Pd(OAc) <sub>2</sub>                               | CuCl                 | DCM               | 80        | 32                        |
| 15              | Pd(OAc) <sub>2</sub>                               | CuCl                 | 1,4-Dioxane       | 80        | 39                        |
| 16              | Pd(OAc) <sub>2</sub>                               | CuCl                 | Toluene           | 80        | 34                        |
| 17              | Pd(OAc) <sub>2</sub>                               | CuCl                 | DME               | 70        | 67                        |
| 18              | Pd(OAc) <sub>2</sub>                               | CuCl                 | DME               | 60        | 70                        |
| 19              | Pd(OAc) <sub>2</sub>                               | CuCl                 | DME               | 50        | 72                        |
| 20              | Pd(OAc) <sub>2</sub>                               | CuCl                 | DME               | 40        | 75                        |
| 21              | Pd(OAc) <sub>2</sub>                               | CuCl                 | DME               | rt        | 27                        |
| 22 <sup>c</sup> | Pd(OAc) <sub>2</sub>                               | CuCl                 | DME               | 40        | 69                        |
| 23 <sup>d</sup> | Pd(OAc) <sub>2</sub>                               | CuCl                 | DME               | 40        | trace                     |

<sup>a</sup> Reaction conditions: **3a** (0.2 mmol), catalyst (10 mol%), oxidant (1 equiv.), DME (2 mL), O<sub>2</sub>, 12 h. <sup>b</sup> Isolated yield. <sup>c</sup> Under air atmosphere. <sup>d</sup> Under argon atmosphere.



## 7. General procedure of Pd(II)-catalyzed oxidative dearomatization of 2-substituted indoles

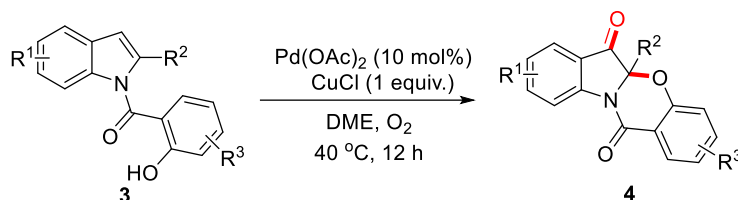

A sealed tube was charged with *N*-acylindole substrate **3** (0.2 mmol, 1 equiv.), Pd(OAc)<sub>2</sub> (0.02 mmol, 10 mol%), CuCl (0.2 mmol, 1 equiv.), and DME (2 mL) under O<sub>2</sub> atmosphere. The reaction mixture was vigorously stirred at 40 °C (oil temperature) for 12 h. After cooling to room temperature, the reaction mixture was diluted with EA (10 mL) and filtered through a plug of Celite. The filtrate was washed with water and brine, dried over anhydrous Na<sub>2</sub>SO<sub>4</sub>, and concentrated *in vacuo* to give dark residue, which was purified by flash chromatography on silica gel with PE/EA (*v/v* = 50:1 to 40:1, TLC: R<sub>f</sub> = 0.5 – 0.6, PE/EA = 20:1) to afford dearomatized product **4**.

## 8. Preliminary asymmetric study

Table S2 Preliminary asymmetric study <sup>a-c</sup>

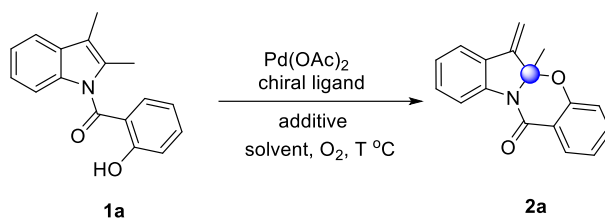

| Entry          | Ligand    | Additive | Solvent     | Temperature | Yield (%) | ee (%) |
|----------------|-----------|----------|-------------|-------------|-----------|--------|
| 1              | <b>L1</b> | /        | 1,4-dioxane | 80 °C       | trace     | /      |
| 2              | <b>L2</b> | /        | 1,4-dioxane | 80 °C       | 30        | 5      |
| 3              | <b>L3</b> | /        | 1,4-dioxane | 80 °C       | 75        | 2      |
| 4 <sup>d</sup> | <b>L4</b> | /        | 1,4-dioxane | 80 °C       | 43        | 6      |
| 5              | <b>L5</b> | /        | 1,4-dioxane | 80 °C       | 41        | 2      |
| 6              | <b>L6</b> | /        | 1,4-dioxane | 80 °C       | 40        | 8      |
| 7              | <b>L7</b> | /        | 1,4-dioxane | 80 °C       | 21        | 18     |
| 8              | <b>L8</b> | /        | 1,4-dioxane | 80 °C       | 25        | 16     |

|                       |            |                        |                    |              |           |           |
|-----------------------|------------|------------------------|--------------------|--------------|-----------|-----------|
| 9                     | <b>L9</b>  | /                      | 1,4-dioxane        | 80 °C        | 18        | 9         |
| 10                    | <b>L10</b> | /                      | 1,4-dioxane        | 80 °C        | trace     | /         |
| <b>11<sup>d</sup></b> | <b>L7</b>  | <b>pyridine</b>        | <b>1,4-dioxane</b> | <b>80 °C</b> | <b>43</b> | <b>36</b> |
| 12                    | <b>L7</b>  | 4,5-diaza-9-fluorenone | 1,4-dioxane        | 80 °C        | 60        | 7         |
| 13                    | <b>L7</b>  | 2,2'-bipyridine        | 1,4-dioxane        | 80 °C        | 41        | 4         |
| 14                    | <b>L7</b>  | pyridine               | DME                | 80 °C        | 20        | 14        |
| 15                    | <b>L7</b>  | pyridine               | DMF                | 80 °C        | trace     | /         |
| 16                    | <b>L7</b>  | pyridine               | DMA                | 80 °C        | 35        | 7         |
| 17                    | <b>L7</b>  | pyridine               | MeOH               | 80 °C        | trace     | /         |
| 18                    | <b>L7</b>  | pyridine               | NMP                | 80 °C        | trace     | /         |
| 19                    | <b>L7</b>  | pyridine               | toluene            | 80 °C        | 56        | 11        |
| 20                    | <b>L7</b>  | pyridine               | 1,4-dioxane        | 50 °C        | 39        | 31        |

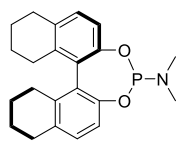

L1

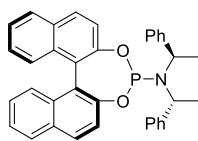

L2

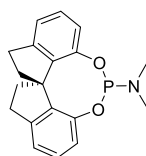

L3

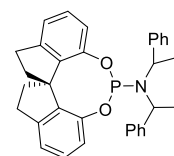

L4

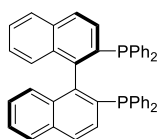

(R)-BINAP

L5

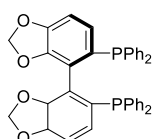

L6

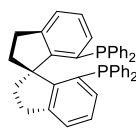

(R)-SDP

L7

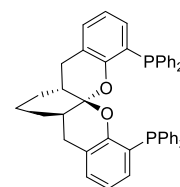

L8

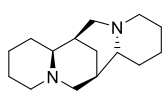(+)Sparteine  
L9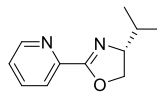

L10

<sup>a</sup> Reaction conditions: **1a** (0.1 mmol), Pd(OAc)<sub>2</sub> (10 mol%) and ligand (12 mol%) in solvent (2 mL) for 26 h under O<sub>2</sub> atmosphere. <sup>b</sup> Isolated yield. <sup>c</sup> The ee values of the products were determined by chiral-phase HPLC analysis. <sup>d</sup> Pyridine (20 mol%) was added.

## Rac-2a

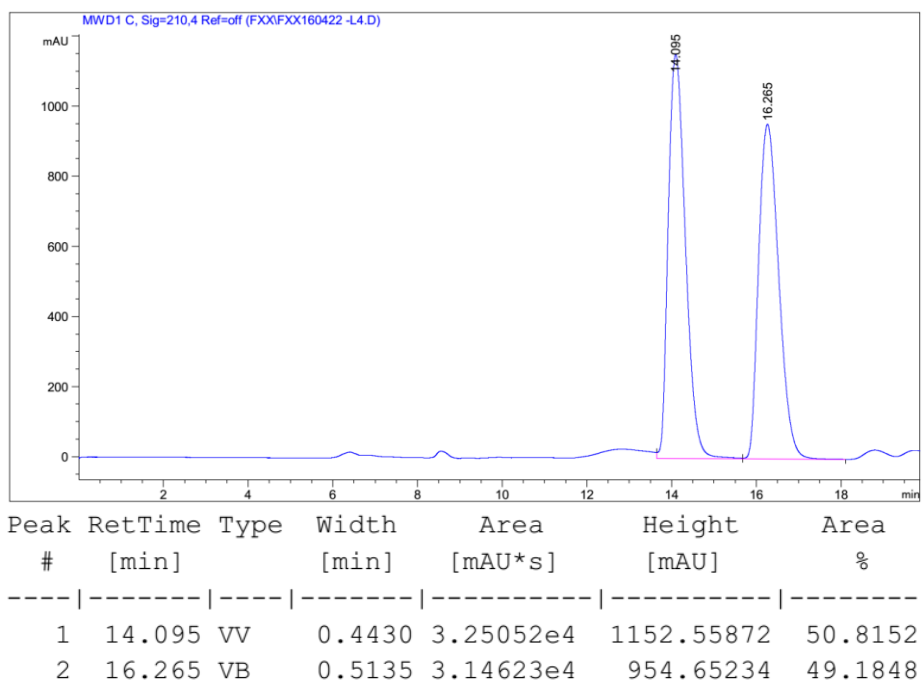

Optically active-2a (Table S1 entry 11)

HPLC data for compound 2a: CHIRALCEL OJ-H, *i*-PrOH: Hexane = 15:85,  $[\alpha]_D^{20} = +51.7$  ( $c = 0.3$ , EA), 0.5 mL/min, 210 nm, 36% ee.

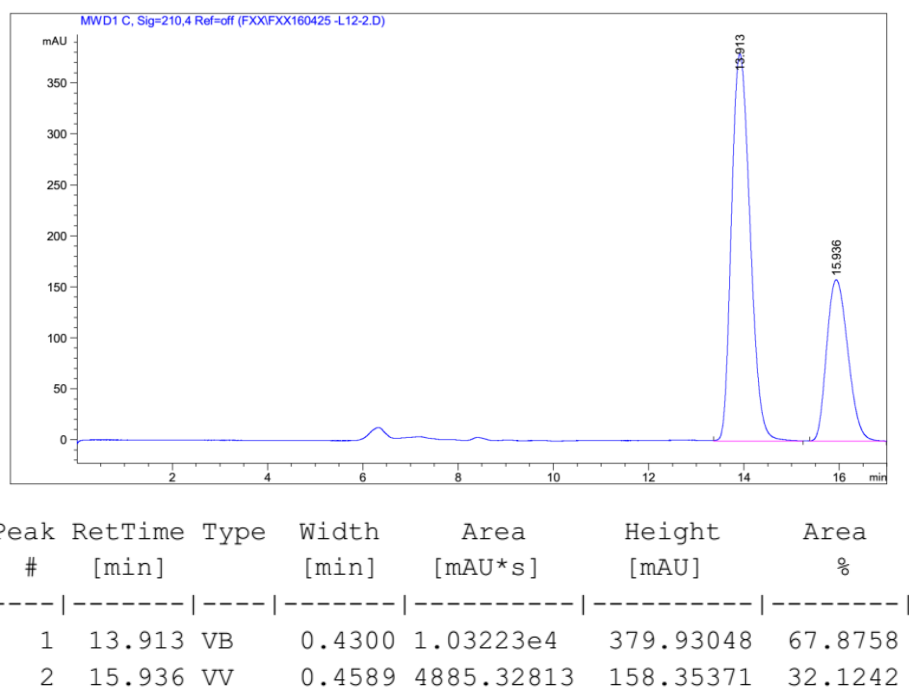

## 9. Characterization of the dearomatized products

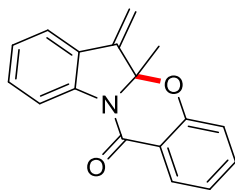

### 5a-methyl-6-methylene-5aH-benzo[5,6][1,3]oxazino[3,2-a]indol-12(6H)-one (2a)

41.0 mg, 78% yield, white solid, m. p. 49 – 50 °C;  $^1\text{H}$  NMR (300 MHz,  $\text{CDCl}_3$ )  $\delta$  8.23 (d,  $J = 8.1$  Hz, 1H), 8.06 (dd,  $J = 7.7, 1.7$  Hz, 1H), 7.66 – 7.42 (m, 2H), 7.39 – 7.33 (m, 1H), 7.13 (m, 2H), 7.16 – 7.10 (m, 1H), 5.75 (s, 1H), 5.53 (s, 1H), 1.64 (s, 3H) ppm;  $^{13}\text{C}$  NMR (75 MHz,  $\text{CDCl}_3$ )  $\delta$  157.9, 155.1, 146.5, 141.2, 134.7, 130.7, 128.3, 125.8, 124.5, 122.7, 121.1, 118.7, 117.6, 116.3, 106.1, 95.4, 25.4 ppm. HRMS (ESI)  $m/z$  calcd for  $[\text{C}_{17}\text{H}_{13}\text{NO}_2+\text{H}]^+$  264.1019, found 264.1017.

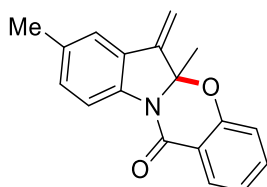

### 5a,8-dimethyl-6-methylene-5aH-benzo[5,6][1,3]oxazino[3,2-a]indol-12(6H)-one (2b)

41.6 mg, 75% yield, yellow liquid;  $^1\text{H}$  NMR (300 MHz,  $\text{CDCl}_3$ )  $\delta$  7.98 – 7.84 (m, 2H), 7.35 – 7.29 (m, 1H), 7.20 (d,  $J = 1.7$  Hz, 1H), 7.04 – 6.96 (m, 2H), 6.91 (d,  $J = 8.2$  Hz, 1H), 5.58 (s, 1H), 5.36 (s, 1H), 2.20 (s, 3H), 1.49 (s, 3H) ppm;  $^{13}\text{C}$  NMR (75 MHz,  $\text{CDCl}_3$ )  $\delta$  157.6, 155.0, 146.5, 139.0, 134.5, 134.2, 131.5, 128.2, 125.8, 122.7, 121.4, 118.8, 117.5, 116.0, 105.7, 95.5, 25.4, 21.2 ppm. HRMS (ESI)  $m/z$  calcd for  $[\text{C}_{18}\text{H}_{15}\text{NO}_2+\text{H}]^+$  278.1176, found 278.1180.

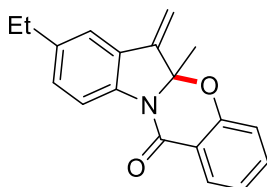

### 8-ethyl-5a-methyl-6-methylene-5aH-benzo[5,6][1,3]oxazino[3,2-a]indol-12(6H)-one (2c)

44.2 mg, 76% yield, yellow liquid;  $^1\text{H}$  NMR (300 MHz,  $\text{CDCl}_3$ )  $\delta$  8.04 (d,  $J = 8.2$  Hz, 1H), 7.97 (dd,  $J = 7.8, 1.7$  Hz, 1H), 7.43 – 7.37 (m, 1H), 7.30 (d,  $J = 1.8$  Hz, 1H), 7.21 – 7.02 (m, 2H), 6.98 (dd,  $J = 8.2, 1.1$  Hz, 1H), 5.67 (s, 1H), 5.44 (s, 1H), 2.58 (q,  $J = 7.6$  Hz, 2H), 1.57 (s, 3H), 1.17 (t,  $J = 7.6$  Hz, 3H) ppm;  $^{13}\text{C}$  NMR (75 MHz,  $\text{CDCl}_3$ )  $\delta$  157.7, 155.1, 146.7, 140.8, 139.2, 134.5, 130.5, 128.2, 125.9, 122.7, 120.2, 118.8, 117.5, 116.2, 105.6, 95.5, 28.7, 25.4, 15.8 ppm. HRMS (ESI)  $m/z$  calcd for  $[\text{C}_{19}\text{H}_{17}\text{NO}_2+\text{H}]^+$  292.1332, found 292.1337.

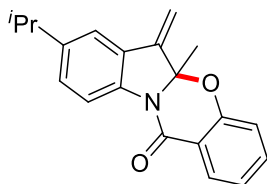

**8-isopropyl-5a-methyl-6-methylene-5aH-benzo[5,6][1,3]oxazino[3,2-a]indol-12(6H)-one (2d)**

51.3 mg, 84% yield, white solid, m. p. 79 – 80 °C;  $^1\text{H}$  NMR (300 MHz,  $\text{CDCl}_3$ )  $\delta$  8.05 (dd,  $J = 8.3, 1.5$  Hz, 1H), 8.01 – 7.93 (m, 1H), 7.45 – 7.34 (m, 1H), 7.32 (d,  $J = 1.9$  Hz, 1H), 7.17 (d,  $J = 8.1$  Hz, 1H), 7.06 (t,  $J = 7.6$  Hz, 1H), 6.97 (d,  $J = 8.2$  Hz, 1H), 5.68 (s, 1H), 5.43 (s, 1H), 2.89 – 2.80 (m, 1H), 1.56 (s, 3H), 1.19 (d,  $J = 1.5$  Hz, 3H), 1.17 (d,  $J = 1.5$  Hz, 3H) ppm;  $^{13}\text{C}$  NMR (75 MHz,  $\text{CDCl}_3$ )  $\delta$  157.7, 155.1, 146.8, 145.5, 139.3, 134.5, 129.2, 128.2, 125.8, 122.7, 118.8, 118.7, 117.5, 116.2, 105.6, 95.6, 34.0, 25.4, 24.2 ppm. HRMS (ESI)  $m/z$  calcd for  $[\text{C}_{20}\text{H}_{19}\text{NO}_2+\text{H}]^+$  306.3704, found 306.3706.

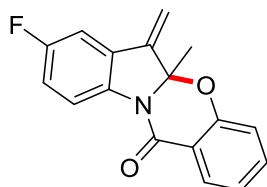

**8-fluoro-5a-methyl-6-methylene-5aH-benzo[5,6][1,3]oxazino[3,2-a]indol-12(6H)-one (2e)**

39.9 mg, 71% yield, white solid, m. p. 69 – 70 °C;  $^1\text{H}$  NMR (300 MHz,  $\text{CDCl}_3$ )  $\delta$  8.19 (dd,  $J = 8.8, 4.7$  Hz, 1H), 8.05 (dd,  $J = 7.7, 1.7$  Hz, 1H), 7.53 – 7.47 (m, 1H), 7.30 – 7.12 (m, 2H), 7.11 – 6.98 (m, 2H), 5.76 (s, 1H), 5.60 (s, 1H), 1.66 (s, 3H) ppm;  $^{13}\text{C}$  NMR (75 MHz,  $\text{CDCl}_3$ )  $\delta$  161.5, 158.2, 157.7, 154.9, 145.9, 134.7, 128.2, 127.4, 122.9, 118.6, 117.6, 117.4, 117.3, 117.3, 108.1, 107.8, 107.5, 95.6, 25.4 ppm. HRMS (ESI)  $m/z$  calcd for  $[\text{C}_{17}\text{H}_{12}\text{FNO}_2+\text{H}]^+$  282.0925, found 282.0922.

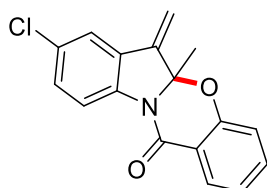

**8-chloro-5a-methyl-6-methylene-5aH-benzo[5,6][1,3]oxazino[3,2-a]indol-12(6H)-one (2f)**

38.6 mg, 65% yield, yellow liquid;  $^1\text{H}$  NMR (300 MHz,  $\text{CDCl}_3$ )  $\delta$  8.06 (d,  $J = 8.6$  Hz, 1H), 7.96 (dd,  $J = 7.8, 1.7$  Hz, 1H), 7.48 – 7.34 (m, 2H), 7.23 (dd,  $J = 8.6, 2.2$  Hz, 1H), 7.09 – 7.04 (m, 1H), 7.01 – 6.85 (m, 1H), 5.68 (s, 1H), 5.50 (s, 1H), 1.56 (s, 3H) ppm;  $^{13}\text{C}$  NMR (75 MHz,  $\text{CDCl}_3$ )  $\delta$  157.8, 155.0, 145.5, 139.6, 134.8, 130.6, 129.7, 128.3, 127.4, 122.9, 121.2, 118.5, 117.6, 117.3, 107.5, 95.6, 25.4 ppm. HRMS (ESI)  $m/z$  calcd for  $[\text{C}_{17}\text{H}_{12}\text{ClNO}_2+\text{H}]^+$  298.0629, found 298.0633.

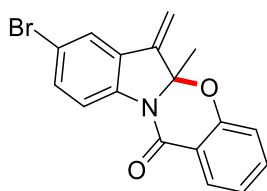

**8-bromo-5a-methyl-6-methylene-5aH-benzo[5,6][1,3]oxazino[3,2-a]indol-12(6H)-one (2g)**

40.9 mg, 60% yield, white liquid;  $^1\text{H}$  NMR (300 MHz,  $\text{CDCl}_3$ )  $\delta$  8.06 – 7.92 (m, 2H), 7.57 (d,  $J = 2.0$  Hz, 1H), 7.48 – 7.32 (m, 2H), 7.13 – 7.03 (m, 1H), 7.03 – 6.92 (m, 1H), 5.68 (s, 1H), 5.50 (s, 1H), 1.56 (s, 3H) ppm;  $^{13}\text{C}$  NMR (75 MHz,  $\text{CDCl}_3$ )  $\delta$  157.9, 155.0, 145.4, 140.1, 134.9, 133.4, 128.3, 127.8, 124.1, 122.9, 118.5, 117.7, 117.6, 117.2, 107.6, 95.5, 25.4 ppm. HRMS (ESI)  $m/z$  calcd for  $[\text{C}_{17}\text{H}_{12}\text{BrNO}_2+\text{H}]^+$  342.0124, found 342.0129.

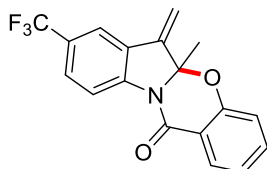

**5a-methyl-6-methylene-8-(trifluoromethyl)-5aH-benzo[5,6][1,3]oxazino[3,2-a]indol-12(6H)-one (2h)**

35.1 mg, 53% yield, white solid, m. p. 94 – 95 °C;  $^1\text{H}$  NMR (300 MHz,  $\text{CDCl}_3$ )  $\delta$  8.20 (d,  $J = 8.4$  Hz, 1H), 7.96 (dd,  $J = 7.8, 1.7$  Hz, 1H), 7.69 (d,  $J = 1.8$  Hz, 1H), 7.53 (dd,  $J = 8.5, 1.8$  Hz, 1H), 7.45 – 7.39 (m, 1H), 7.14 – 7.02 (m, 1H), 6.98 (d,  $J = 8.2$  Hz, 1H), 5.77 (s, 1H), 5.55 (s, 1H), 1.57 (s, 3H) ppm;  $^{13}\text{C}$  NMR (75 MHz,  $\text{CDCl}_3$ )  $\delta$  158.2, 155.0, 145.3, 143.5, 135.1, 128.4, 127.9, 127.9, 127.8, 127.8, 126.7, 126.2, 125.9, 123.0, 122.3, 118.4, 118.3, 118.3, 118.2, 117.7, 116.1, 108.0, 95.7, 25.4 ppm. HRMS (ESI)  $m/z$  calcd for  $[\text{C}_{18}\text{H}_{12}\text{F}_3\text{NO}_2+\text{H}]^+$  332.0893, found 332.0896.

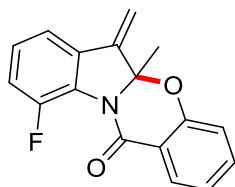

**10-fluoro-5a-methyl-6-methylene-5aH-benzo[5,6][1,3]oxazino[3,2-a]indol-12(6H)-one (2i)**

34.8 mg, 62% yield, yellow liquid;  $^1\text{H}$  NMR (300 MHz,  $\text{CDCl}_3$ )  $\delta$  7.98 (dd,  $J = 7.7, 1.7$  Hz, 1H), 7.43 – 7.38 (m, 1H), 7.31 – 7.21 (m, 1H), 7.13 – 6.93 (m, 4H), 5.70 (s, 1H), 5.48 (s, 1H), 1.56 (s, 3H) ppm;  $^{13}\text{C}$  NMR (75 MHz,  $\text{CDCl}_3$ )  $\delta$  156.3, 154.6, 152.3, 148.9, 146.3, 146.2, 134.5, 130.0, 129.9, 128.8, 126.0, 125.9, 123.0, 119.4, 119.1, 117.3, 116.9, 116.9, 107.0, 96.4, 25.6 ppm. HRMS (ESI)  $m/z$  calcd for  $[\text{C}_{17}\text{H}_{12}\text{FNO}_2+\text{H}]^+$  282.0925, found 282.0929.

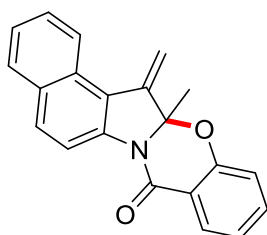

**13a-methyl-14-methylene-13a,14-dihydro-8H-benzo[e]benzo[5,6][1,3]oxazino[3,2-a]indol-8-one (2j)**

38.8 mg, 62% yield, yellow solid, m. p. 115 – 116 °C; <sup>1</sup>H NMR (300 MHz, CDCl<sub>3</sub>) δ 8.47 (d, *J* = 8.9 Hz, 1H), 8.20 (d, *J* = 8.5 Hz, 1H), 8.00 (dd, *J* = 7.8, 1.7 Hz, 1H), 7.89 – 7.65 (m, 2H), 7.59 – 7.21 (m, 3H), 7.14 – 6.87 (m, 2H), 6.05 (s, 1H), 5.66 (s, 1H), 1.58 (s, 3H) ppm; <sup>13</sup>C NMR (75 MHz, CDCl<sub>3</sub>) δ 157.9, 155.2, 147.4, 141.0, 134.7, 132.1, 131.4, 129.5, 129.3, 128.3, 128.0, 124.8, 123.1, 122.8, 118.8, 118.0, 117.6, 116.1, 108.4, 95.6, 25.5 ppm. HRMS (ESI) *m/z* calcd for [C<sub>21</sub>H<sub>15</sub>NO<sub>2</sub>+H]<sup>+</sup> 314.1176, found 314.1176.

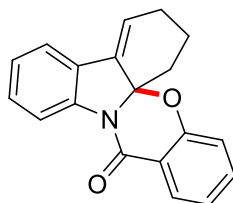

**2,3-dihydrobenzo[5,6][1,3]oxazino[2,3-k]carbazol-10(1H)-one (2k)**

38.2 mg, 66% yield, yellow solid, m. p. 90 – 91 °C; <sup>1</sup>H NMR (300 MHz, CDCl<sub>3</sub>) δ 8.02 (t, *J* = 8.5 Hz, 2H), 7.49 – 7.42 (m, 2H), 7.15 (t, *J* = 7.8 Hz, 1H), 7.03 – 6.94 (m, 2H), 6.88 (d, *J* = 8.2 Hz, 1H), 6.24 (t, *J* = 4.3 Hz, 1H), 2.56 – 2.46 (m, 2H), 2.37 – 2.25 (m, 1H), 2.06 – 1.71 (m, 1H), 1.63 – 1.40 (m, 2H) ppm; <sup>13</sup>C NMR (75 MHz, CDCl<sub>3</sub>) δ 160.2, 154.7, 141.9, 135.0, 134.5, 128.7, 128.0, 126.3, 124.3, 123.6, 122.1, 119.5, 116.9, 114.4, 93.0, 29.2, 23.3, 15.4 ppm. HRMS (ESI) *m/z* calcd for [C<sub>19</sub>H<sub>15</sub>NO<sub>2</sub>+H]<sup>+</sup> 290.1176, found 290.1177.

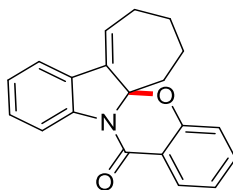

**3,4-dihydro-1H-benzo[5,6][1,3]oxazino[3,2-a]cyclohepta[b]indol-11(2H)-one (2l)**

44.3 mg, 73% yield, white solid, m. p. 124 – 125 °C; <sup>1</sup>H NMR (300 MHz, CDCl<sub>3</sub>) δ 8.05 (d, *J* = 8.0 Hz, 1H), 7.99 – 7.84 (m, 1H), 7.39 (t, *J* = 7.7 Hz, 1H), 7.27 (s, 1H), 7.16 (t, *J* = 7.7 Hz, 1H), 7.10 – 6.85 (m, 3H), 6.56 – 6.52 (m, 1H), 2.92 – 2.80 (m, 1H), 2.39 – 2.32 (m, 1H), 2.25 – 2.15 (m, 1H), 1.91 – 1.55 (m, 4H), 1.54 – 1.29 (m, 1H) ppm; <sup>13</sup>C NMR (75 MHz, CDCl<sub>3</sub>) δ 158.6, 154.6, 141.6, 140.3, 134.7, 129.3, 128.2, 126.7, 125.6, 124.3, 122.7, 119.7, 119.6, 117.5, 115.7, 98.0, 32.9, 27.8, 26.5, 26.3 ppm. HRMS (ESI) *m/z* calcd for [C<sub>20</sub>H<sub>17</sub>NO<sub>2</sub>+H]<sup>+</sup> 304.1332, found 304.1338.

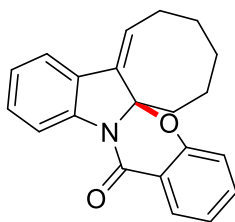

**2,3,4,5-tetrahydrobenzo[5,6][1,3]oxazino[3,2-a]cycloocta[b]indol-12(1H)-one (2m)**

40.6 mg, 64% yield, white solid, m. p. 159 – 160 °C;  $^1\text{H}$  NMR (300 MHz,  $\text{CDCl}_3$ )  $\delta$  8.13 (d,  $J = 8.0$  Hz, 1H), 7.95 (dd,  $J = 7.7, 1.7$  Hz, 1H), 7.45 – 7.28 (m, 2H), 7.21 – 7.16 (m, 1H), 7.06 – 6.97 (m, 3H), 6.38 – 6.32 (m, 1H), 3.34 – 3.04 (m, 1H), 2.60 – 2.35 (m, 1H), 2.25 – 2.17 (m, 1H), 1.88 – 1.30 (m, 6H), 1.38 – 1.27 (m, 1H) ppm;  $^{13}\text{C}$  NMR (75 MHz,  $\text{CDCl}_3$ )  $\delta$  157.8, 154.3, 140.1, 137.5, 134.5, 129.3, 128.0, 127.2, 124.3, 123.3, 122.7, 119.9, 119.1, 117.5, 116.3, 98.3, 37.7, 28.4, 25.4, 23.3, 20.6 ppm. HRMS (ESI)  $m/z$  calcd for  $[\text{C}_{21}\text{H}_{19}\text{NO}_2 + \text{H}]^+$  318.1489, found 318.1489.

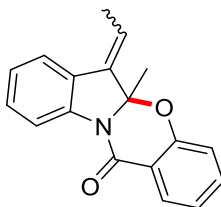

**(Z/E)-6-ethylidene-5a-methyl-5aH-benzo[5,6][1,3]oxazino[3,2-a]indol-12(6H)-one (2n)**

Inseparable mixture,  $Z/E = 1.6:1$ , 41.6 mg, 75% yield, pale yellow liquid;  $^1\text{H}$  NMR (300 MHz,  $\text{CDCl}_3$ )  $\delta$  8.19 – 8.17 (m, 0.7H) (minor), 8.10 – 8.07 (m, 1H) (major), 7.95 – 7.92 (m, 1.7H), 7.52 – 7.49 (m, 0.8H), 7.35 – 7.10 (m, 4.6H), 7.06 – 6.95 (m, 2.7H), 6.93 – 6.88 (m, 2.3H), 6.14 – 6.06 (q,  $J = 7.5$  Hz, 1H) (major), 6.04 – 5.96 (q,  $J = 7.4$  Hz, 0.6H) (minor), 2.02 – 1.98 (m, 5H), 1.55 (s, 3H) (major), 1.44 (s, 2H) (minor) ppm;  $^{13}\text{C}$  NMR (75 MHz,  $\text{CDCl}_3$ )  $\delta$  158.0, 157.7, 155.0, 154.8, 141.2, 139.9, 138.5, 137.4, 134.6, 134.5, 129.3, 129.2, 128.2, 128.1, 127.2, 126.3, 124.6, 124.4, 124.3, 122.7, 122.6, 121.3, 120.0, 119.7, 118.8, 117.6, 117.5, 116.1, 116.1, 96.1, 95.6, 25.7, 23.1, 14.2, 13.9 ppm. HRMS (ESI)  $m/z$  calcd for  $[\text{C}_{18}\text{H}_{15}\text{NO}_2 + \text{Na}]^+$  300.0995, found 300.0997.



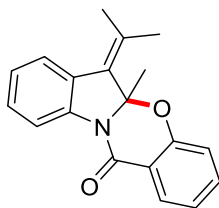

**5a-methyl-6-(propan-2-ylidene)-5aH-benzo[5,6][1,3]oxazino[3,2-a]indol-12(6H)-one (2o)**

35.5 mg, 61% yield, white solid, m. p. 90 – 91 °C; <sup>1</sup>H NMR (300 MHz, CDCl<sub>3</sub>) δ 8.23 – 8.18 (m, 1H), 7.94 (dd, *J* = 7.7, 1.8 Hz, 1H), 7.45 (d, *J* = 7.8 Hz, 1H), 7.36 – 7.31 (m, 1H), 7.16 – 7.11 (m, 1H), 7.03 – 6.94 (m, 2H), 6.93 – 6.84 (m, 1H), 2.15 (s, 3H), 2.04 (s, 3H), 1.54 (s, 3H) ppm; <sup>13</sup>C NMR (75 MHz, CDCl<sub>3</sub>) δ 157.8, 154.7, 140.5, 134.5, 133.4, 131.2, 128.2, 128.0, 127.8, 124.4, 124.1, 122.6, 118.9, 117.5, 115.9, 96.6, 23.3, 23.1, 23.0 ppm. HRMS (ESI) *m/z* calcd for [C<sub>19</sub>H<sub>17</sub>NO<sub>2</sub>+H]<sup>+</sup> 292.1332, found 292.1333.

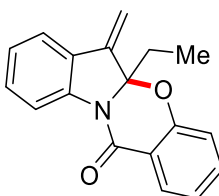

**5a-ethyl-6-methylene-5aH-benzo[5,6][1,3]oxazino[3,2-a]indol-12(6H)-one (2p)**

36.0 mg, 65% yield, white solid, m. p. 72 – 73 °C; <sup>1</sup>H NMR (300 MHz, CDCl<sub>3</sub>) δ 8.14 (d, *J* = 8.1 Hz, 1H), 7.96 (dd, *J* = 7.8, 1.9 Hz, 1H), 7.64 – 7.33 (m, 2H), 7.26 (t, *J* = 7.8 Hz, 1H), 7.12 – 6.87 (m, 3H), 5.73 (s, 1H), 5.44 (s, 1H), 2.17 – 1.73 (m, 2H), 0.71 – 0.66 (m, 3H) ppm; <sup>13</sup>C NMR (75 MHz, CDCl<sub>3</sub>) δ 157.9, 155.0, 144.5, 142.0, 134.7, 130.6, 128.2, 126.6, 124.4, 122.6, 120.6, 118.8, 117.4, 116.0, 106.8, 97.8, 30.8, 7.1 ppm. HRMS (ESI) *m/z* calcd for [C<sub>18</sub>H<sub>15</sub>NO<sub>2</sub>+Na]<sup>+</sup> 300.0995, found 300.0996.

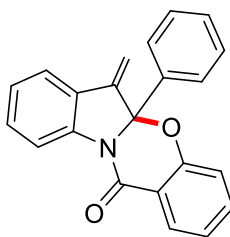

**6-methylene-5a-phenyl-5aH-benzo[5,6][1,3]oxazino[3,2-a]indol-12(6H)-one (2q)**

19.5 mg, 30% yield, white solid, m. p. 174 – 175 °C; <sup>1</sup>H NMR (300 MHz, CDCl<sub>3</sub>) δ 8.31 (d, *J* = 8.1 Hz, 1H), 7.85 (dd, *J* = 7.8, 1.7 Hz, 1H), 7.49 – 7.27 (m, 5H), 7.19 – 7.08 (m, 5H), 6.96 (t, *J* = 7.5 Hz, 1H), 5.69 (s, 1H), 5.58 (s, 1H) ppm; <sup>13</sup>C NMR (75 MHz, CDCl<sub>3</sub>) δ 158.7, 155.4, 146.5, 142.6, 140.6, 134.7, 130.9, 128.8, 128.7, 128.3, 125.5, 124.9, 124.7, 122.9, 121.5, 119.7, 117.7, 115.5, 107.4, 96.7 ppm. HRMS (ESI) *m/z* calcd for [C<sub>22</sub>H<sub>15</sub>NO<sub>2</sub>+H]<sup>+</sup> 326.1176, found 326.1176.

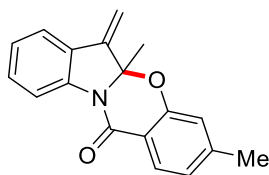

**3,5a-dimethyl-6-methylene-5aH-benzo[5,6][1,3]oxazino[3,2-a]indol-12(6H)-one (2r)**

45.4 mg, 82% yield, white liquid;  $^1\text{H}$  NMR (300 MHz,  $\text{CDCl}_3$ )  $\delta$  8.12 (d,  $J = 8.1$  Hz, 1H), 7.85 (d,  $J = 7.9$  Hz, 1H), 7.45 (d,  $J = 7.7$  Hz, 1H), 7.27 (t,  $J = 7.8$  Hz, 1H), 7.03 (t,  $J = 7.5$  Hz, 1H), 6.87 (d,  $J = 8.0$  Hz, 1H), 6.79 (s, 1H), 5.66 (s, 1H), 5.43 (s, 1H), 2.29 (s, 3H), 1.56 (s, 3H) ppm;  $^{13}\text{C}$  NMR (75 MHz,  $\text{CDCl}_3$ )  $\delta$  158.1, 155.1, 146.7, 145.9, 130.7, 128.1, 125.8, 124.2, 124.0, 123.8, 121.0, 120.2, 117.8, 116.2, 105.7, 95.4, 25.4, 21.8 ppm. HRMS (ESI)  $m/z$  calcd for  $[\text{C}_{18}\text{H}_{15}\text{NO}_2+\text{H}]^+$  278.1176, found 278.1175.

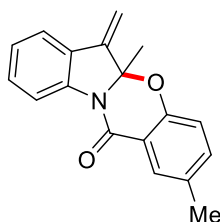

**2,5a-dimethyl-6-methylene-5aH-benzo[5,6][1,3]oxazino[3,2-a]indol-12(6H)-one (2s)**

41.6 mg, 75% yield, white solid, m. p. 65 – 66 °C;  $^1\text{H}$  NMR (300 MHz,  $\text{CDCl}_3$ )  $\delta$  8.22 (d,  $J = 8.1$  Hz, 1H), 7.85 (d,  $J = 2.2$  Hz, 1H), 7.60 – 7.47 (m, 1H), 7.39 – 7.33 (m, 1H), 7.27 (dd,  $J = 8.3, 2.3$  Hz, 1H), 7.18 – 7.06 (m, 1H), 6.95 (d,  $J = 8.3$  Hz, 1H), 5.74 (s, 1H), 5.51 (s, 1H), 2.35 (s, 3H), 1.63 (s, 3H) ppm;  $^{13}\text{C}$  NMR (75 MHz,  $\text{CDCl}_3$ )  $\delta$  158.1, 153.0, 146.6, 141.2, 135.4, 132.3, 130.7, 128.2, 125.8, 124.3, 121.0, 118.4, 117.3, 116.3, 105.9, 95.3, 25.3, 20.6 ppm. HRMS (ESI)  $m/z$  calcd for  $[\text{C}_{18}\text{H}_{15}\text{NO}_2+\text{H}]^+$  278.1176, found 278.1180.

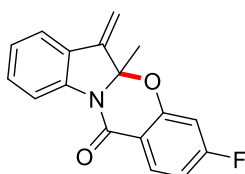

**3-fluoro-5a-methyl-6-methylene-5aH-benzo[5,6][1,3]oxazino[3,2-a]indol-12(6H)-one (2t)**

39.9 mg, 71% yield, yellow liquid;  $^1\text{H}$  NMR (300 MHz,  $\text{CDCl}_3$ )  $\delta$  8.25 (d,  $J = 8.1$  Hz, 1H), 8.12 (dd,  $J = 8.7, 6.4$  Hz, 1H), 7.58 (d,  $J = 7.6$  Hz, 1H), 7.41 (t,  $J = 7.8$  Hz, 1H), 7.18 (t,  $J = 7.6$  Hz, 1H), 6.94 – 6.88 (m, 1H), 6.83 (dd,  $J = 9.4, 2.3$  Hz, 1H), 5.81 (s, 1H), 5.57 (s, 1H), 1.72 (s, 3H) ppm;  $^{13}\text{C}$  NMR (75 MHz,  $\text{CDCl}_3$ )  $\delta$  168.2, 164.8, 157.1, 146.1, 141.0, 130.8, 130.5, 130.3, 125.6, 124.5, 121.1, 116.2, 115.3, 110.7, 110.4, 106.2, 105.2, 104.8, 96.0, 25.4 ppm. HRMS (ESI)  $m/z$  calcd for  $[\text{C}_{17}\text{H}_{12}\text{FNO}_2+\text{Na}]^+$  304.0744, found 304.0743.

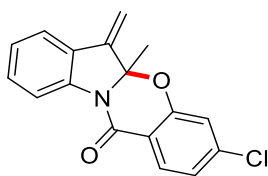

**3-chloro-5a-methyl-6-methylene-5aH-benzo[5,6][1,3]oxazino[3,2-a]indol-12(6H)-one (2u)**

34.5 mg, 58% yield, white solid, m. p. 103 – 104 °C; <sup>1</sup>H NMR (300 MHz, CDCl<sub>3</sub>) δ 8.20 (d, *J* = 8.1 Hz, 1H), 8.03 (d, *J* = 2.7 Hz, 1H), 7.62 – 7.50 (m, 1H), 7.51 – 7.30 (m, 2H), 7.19 – 7.14 (m, 1H), 7.03 (d, *J* = 8.7 Hz, 1H), 5.78 (s, 1H), 5.53 (s, 1H), 1.66 (s, 3H) ppm; <sup>13</sup>C NMR (75 MHz, CDCl<sub>3</sub>) δ 153.5, 146.1, 140.9, 134.5, 130.8, 128.1, 127.9, 125.8, 124.7, 121.1, 119.9, 119.1, 116.3, 106.2, 95.7, 25.4 ppm. HRMS (ESI) *m/z* calcd for [C<sub>17</sub>H<sub>12</sub>ClNO<sub>2</sub>+Na]<sup>+</sup> 320.0449, found 320.0450.

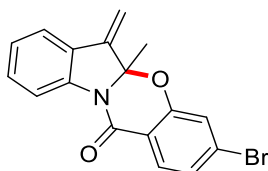

**3-bromo-5a-methyl-6-methylene-5aH-benzo[5,6][1,3]oxazino[3,2-a]indol-12(6H)-one (2v)**

38.2 mg, 56% yield, white solid, m. p. 75 – 76 °C; <sup>1</sup>H NMR (300 MHz, CDCl<sub>3</sub>) δ 8.09 (d, *J* = 8.1 Hz, 1H), 7.82 (d, *J* = 8.1 Hz, 1H), 7.44 (d, *J* = 7.6 Hz, 1H), 7.33 – 7.12 (m, 3H), 7.05 (t, *J* = 7.5 Hz, 1H), 5.67 (s, 1H), 5.42 (s, 1H), 1.56 (s, 3H) ppm; <sup>13</sup>C NMR (75 MHz, CDCl<sub>3</sub>) δ 157.2, 155.5, 146.1, 141.0, 130.8, 129.5, 128.6, 126.2, 125.7, 124.6, 121.1, 120.9, 117.8, 116.3, 106.2, 95.9, 25.5 ppm. HRMS (ESI) *m/z* calcd for [C<sub>17</sub>H<sub>12</sub>BrNO<sub>2</sub>+Na]<sup>+</sup> 365.9925, found 365.9929.

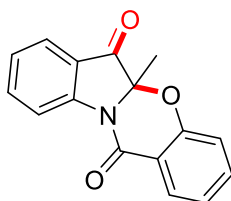

**5a-methyl-5aH-benzo[5,6][1,3]oxazino[3,2-a]indole-6,12-dione (4a)**

39.8 mg, 75% yield, pale yellow solid, m. p. 117 – 118 °C; <sup>1</sup>H NMR (300 MHz, CDCl<sub>3</sub>) δ 8.32 (d, *J* = 8.3 Hz, 1H), 7.96 (dd, *J* = 7.7, 1.7 Hz, 1H), 7.82 – 7.71 (m, 1H), 7.67 – 7.63 (m, 1H), 7.53 – 7.35 (m, 1H), 7.27 – 7.14 (m, 1H), 7.14 – 6.90 (m, 2H), 1.60 (s, 3H) ppm; <sup>13</sup>C NMR (75 MHz, CDCl<sub>3</sub>) δ 193.6, 157.7, 155.5, 150.0, 138.5, 135.3, 128.5, 125.2, 125.0, 123.4, 120.8, 118.2, 118.1, 117.2, 90.7, 20.5 ppm. HRMS (ESI) *m/z* calcd for [C<sub>16</sub>H<sub>11</sub>NO<sub>3</sub>+H]<sup>+</sup> 266.0812, found 266.0811.

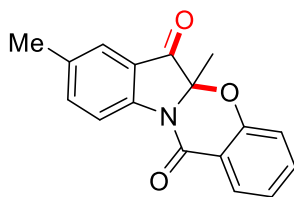

**5a,8-dimethyl-12H-benzo[5,6][1,3]oxazino[3,2-a]indole-6,12(5aH)-dione (4b)**

41.3 mg, 74% yield, white solid, m. p. 130 – 131 °C; <sup>1</sup>H NMR (300 MHz, CDCl<sub>3</sub>) δ 8.20 (d, *J* = 8.3 Hz, 1H), 7.97 (dd, *J* = 7.8, 1.7 Hz, 1H), 7.55 – 7.54 (m, 1H), 7.58 – 7.40 (m, 2H), 7.16 – 7.03 (m, 2H), 2.33 (s, 3H), 1.60 (s, 3H) ppm; <sup>13</sup>C NMR (75 MHz, CDCl<sub>3</sub>) δ 193.7, 157.5, 155.6, 148.1, 139.6, 135.2, 128.4, 128.0, 124.9, 123.3, 120.9, 118.4, 118.1, 117.0, 90.9, 20.9, 20.5 ppm. HRMS (ESI) *m/z* calcd for [C<sub>17</sub>H<sub>13</sub>NO<sub>3</sub>+Na]<sup>+</sup> 302.0788, found 302.0785.

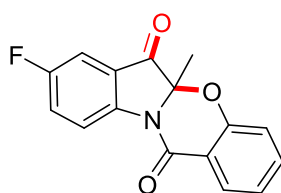

**8-fluoro-5a-methyl-12H-benzo[5,6][1,3]oxazino[3,2-a]indole-6,12(5aH)-dione (4c)**

38.5 mg, 68% yield, white solid, m. p. 134 – 135 °C; <sup>1</sup>H NMR (300 MHz, CDCl<sub>3</sub>) δ 8.42 (dd, *J* = 9.6, 4.3 Hz, 1H), 8.04 (dd, *J* = 7.8, 1.7 Hz, 1H), 7.58 – 7.44 (m, 3H), 7.28 – 7.10 (m, 2H), 1.71 (s, 3H) ppm; <sup>13</sup>C NMR (75 MHz, CDCl<sub>3</sub>) δ 192.8, 161.1, 157.9, 157.4, 155.4, 146.4, 135.4, 134.9, 128.5, 128.0, 125.9, 125.6, 123.5, 118.9, 118.8, 118.1, 111.0, 110.7, 91.1, 20.5 ppm. HRMS (ESI) *m/z* calcd for [C<sub>16</sub>H<sub>10</sub>FNO<sub>3</sub>+H]<sup>+</sup> 284.0717, found 284.0717.

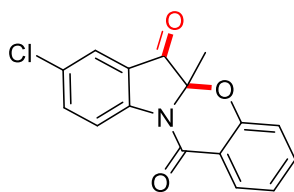

**8-chloro-5a-methyl-12H-benzo[5,6][1,3]oxazino[3,2-a]indole-6,12(5aH)-dione (4d)**

34.7 mg, 58% yield, white solid, m. p. 173 – 174 °C; <sup>1</sup>H NMR (300 MHz, CDCl<sub>3</sub>) δ 8.39 (d, *J* = 8.7 Hz, 1H), 8.13 – 8.00 (m, 1H), 7.81 (d, *J* = 2.2 Hz, 1H), 7.71 (dd, *J* = 8.7, 2.3 Hz, 1H), 7.57 (t, *J* = 7.5 Hz, 1H), 7.31 – 7.11 (m, 2H), 1.71 (s, 3H) ppm; <sup>13</sup>C NMR (75 MHz, CDCl<sub>3</sub>) δ 192.5, 157.6, 155.5, 148.4, 138.3, 135.6, 130.7, 128.6, 124.8, 123.6, 122.2, 118.5, 118.2, 118.0, 91.1, 20.5 ppm. HRMS (ESI) *m/z* calcd for [C<sub>16</sub>H<sub>10</sub>ClNO<sub>3</sub>+Na]<sup>+</sup> 322.0241, found 322.0238.

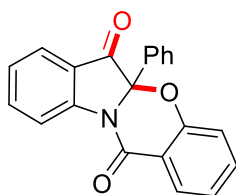

**5a-phenyl-12H-benzo[5,6][1,3]oxazino[3,2-a]indole-6,12(5aH)-dione (4e)**

30.7 mg, 47% yield, white solid, m. p. 185 – 186 °C;  $^1\text{H}$  NMR (300 MHz,  $\text{CDCl}_3$ )  $\delta$  8.58 (d,  $J = 8.2$  Hz, 1H), 7.94 (dd,  $J = 7.8, 1.7$  Hz, 1H), 7.82 – 7.76 (m, 2H), 7.56 (dd,  $J = 6.7, 3.0$  Hz, 2H), 7.46 – 7.41 (m, 1H), 7.35 – 7.22 (m, 4H), 7.19 (d,  $J = 8.2$  Hz, 1H), 7.06 (t,  $J = 7.6$  Hz, 1H) ppm;  $^{13}\text{C}$  NMR (75 MHz,  $\text{CDCl}_3$ )  $\delta$  191.4, 158.4, 155.9, 150.9, 138.5, 135.2, 133.6, 129.9, 129.0, 128.4, 126.5, 125.9, 125.3, 123.5, 120.7, 119.2, 118.1, 116.7, 92.2 ppm. HRMS (ESI)  $m/z$  calcd for  $[\text{C}_{21}\text{H}_{13}\text{NO}_3+\text{Na}]^+$  350.0788, found 350.0785.

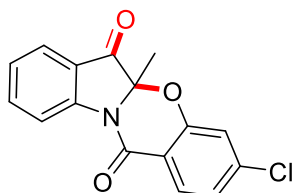

**3-chloro-5a-methyl-12H-benzo[5,6][1,3]oxazino[3,2-a]indole-6,12(5aH)-dione (4f)**

31.7 mg, 53% yield, white solid, m. p. 218 – 219 °C;  $^1\text{H}$  NMR (300 MHz,  $\text{CDCl}_3$ )  $\delta$  8.31 (d,  $J = 8.3$  Hz, 1H), 7.93 (d,  $J = 2.6$  Hz, 1H), 7.77 (dd,  $J = 7.8, 1.3$  Hz, 1H), 7.72 – 7.66 (m, 1H), 7.41 (dd,  $J = 8.8, 2.7$  Hz, 1H), 7.28 – 7.18 (m, 1H), 7.04 (d,  $J = 8.7$  Hz, 1H), 1.62 (s, 3H) ppm;  $^{13}\text{C}$  NMR (75 MHz,  $\text{CDCl}_3$ )  $\delta$  193.0, 156.5, 154.0, 149.7, 138.6, 135.2, 128.9, 128.1, 125.3, 120.8, 119.6, 119.4, 117.3, 90.9, 20.5 ppm. HRMS (ESI)  $m/z$  calcd for  $[\text{C}_{16}\text{H}_{10}\text{ClNO}_3+\text{Na}]^+$  322.0241, found 322.0251.

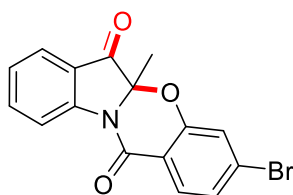

**3-bromo-5a-methyl-12H-benzo[5,6][1,3]oxazino[3,2-a]indole-6,12(5aH)-dione (4g)**

39.1 mg, 57% yield, white solid, m. p. 120 – 121 °C;  $^1\text{H}$  NMR (300 MHz,  $\text{CDCl}_3$ )  $\delta$  8.38 (d,  $J = 8.2$  Hz, 1H), 7.91 (d,  $J = 8.7$  Hz, 1H), 7.85 (dd,  $J = 7.8, 1.4$  Hz, 1H), 7.80 – 7.74 (m, 1H), 7.39 – 7.27 (m, 3H), 1.71 (s, 3H) ppm;  $^{13}\text{C}$  NMR (75 MHz,  $\text{CDCl}_3$ )  $\delta$  192.9, 157.0, 155.9, 149.8, 138.6, 129.7, 129.5, 127.0, 125.3, 125.2, 121.4, 120.8, 117.2, 91.0, 20.6 ppm. HRMS (ESI)  $m/z$  calcd for  $[\text{C}_{16}\text{H}_{10}\text{BrNO}_3+\text{Na}]^+$  365.9736, found 365.9736.

10. NOE analysis of 2n

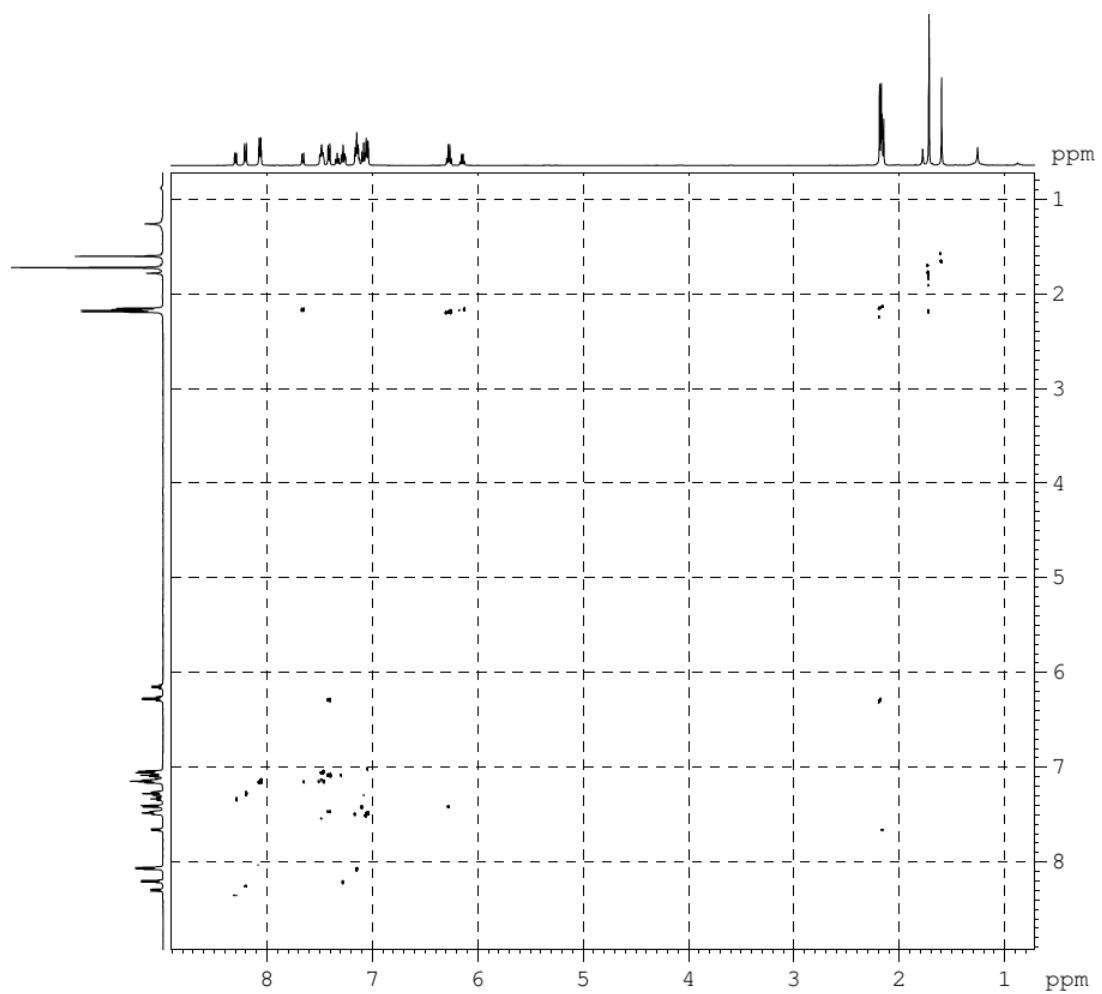

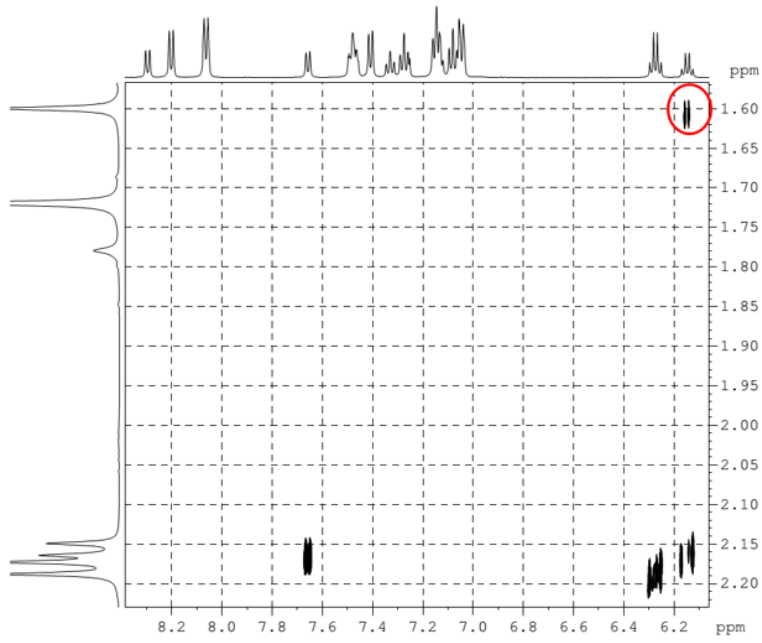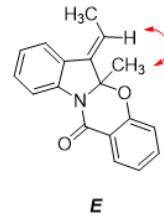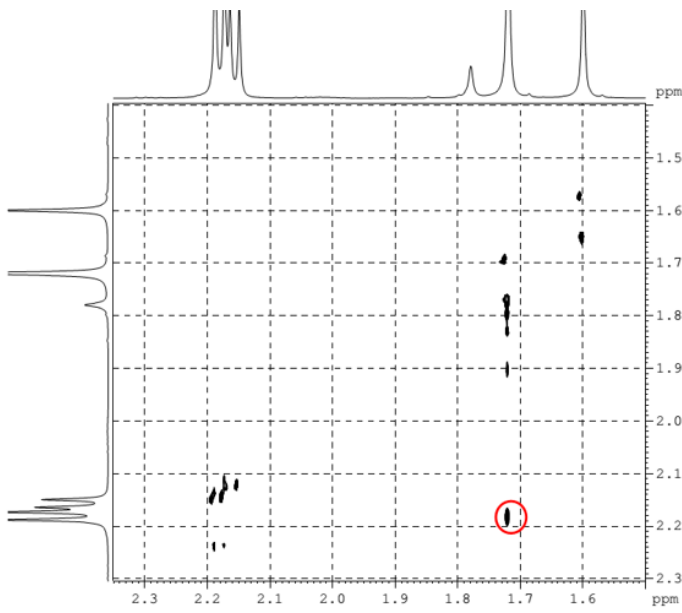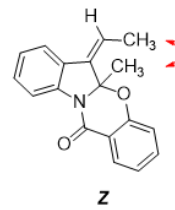

## 11. Crystal structures of 2q and 4a

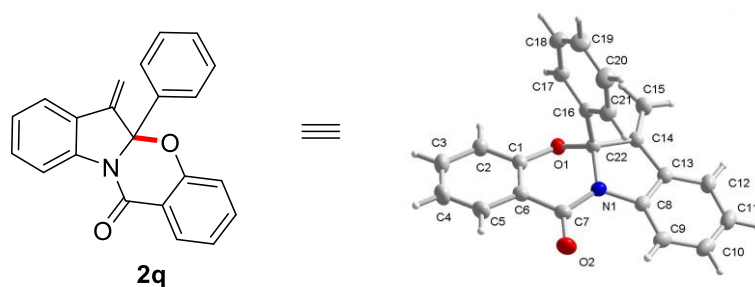

Figure S1. ORTEP plot of the crystal structure of 2q.

### X-ray crystallographic data of 2q

|                                  |                                                   |
|----------------------------------|---------------------------------------------------|
| CCDC number                      | 1508997                                           |
| Empirical formula                | C <sub>22</sub> H <sub>15</sub> NO <sub>2</sub>   |
| Formula weight                   | 325.35                                            |
| Temperature                      | 296 K                                             |
| Wavelength                       | 0.71073 Å                                         |
| Space group                      | Pbca                                              |
| Unit cell dimensions             | a= 8.874(6) Å =90 °                               |
|                                  | b= 13.733(9) Å =90 °                              |
|                                  | c= 27.215(17) Å =90 °                             |
| Volume                           | 3317(4) Å <sup>3</sup>                            |
| Z                                | 8                                                 |
| Density (calculated)             | 1.303 Mg/m <sup>3</sup>                           |
| F(000)                           | 1360.0                                            |
| Completeness to theta = 25.010 ° | 94.1%                                             |
| Absorption correction            | MULTI-SCAN                                        |
| Max. and min. transmission       | 0.996 and 0.990                                   |
| R indices (all data)             | R= 0.0354(2726)<br>wR2(reflections)= 0.0962(3390) |



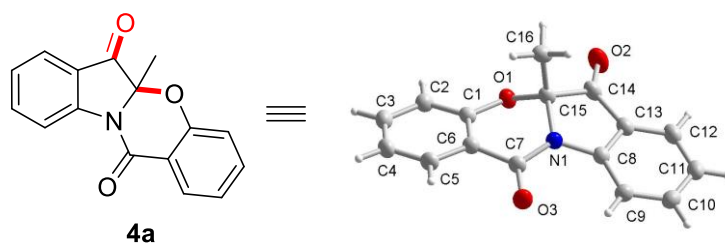

Figure S2. ORTEP plot of the crystal structure of 4a.

*X-ray crystallographic data of 4a*

|                                  |                                                   |
|----------------------------------|---------------------------------------------------|
| CCDC number                      | 1508996                                           |
| Empirical formula                | C <sub>16</sub> H <sub>11</sub> NO <sub>3</sub>   |
| Formula weight                   | 265.26                                            |
| Temperature                      | 296 K                                             |
| Wavelength                       | 0.71073 Å                                         |
| Space group                      | P21/c                                             |
| Unit cell dimensions             | a= 8.269(3) Å      =90 °                          |
|                                  | b= 9.296(4) Å      =93.281(4) °                   |
|                                  | c= 16.904(7) Å      =90 °                         |
| Volume                           | 1297.3(9) Å <sup>3</sup>                          |
| Z                                | 4                                                 |
| Density (calculated)             | 1.358 Mg/m <sup>3</sup>                           |
| F(000)                           | 552.0                                             |
| Completeness to theta = 25.010 ° | 91.1%                                             |
| Absorption correction            | MULTI-SCAN                                        |
| Max. and min. transmission       | 0.991 and 0.989                                   |
| R indices (all data)             | R= 0.0372(2113)<br>wR2(reflections)= 0.1039(2581) |

## 12. <sup>1</sup>H and <sup>13</sup>C NMR spectra of title compounds

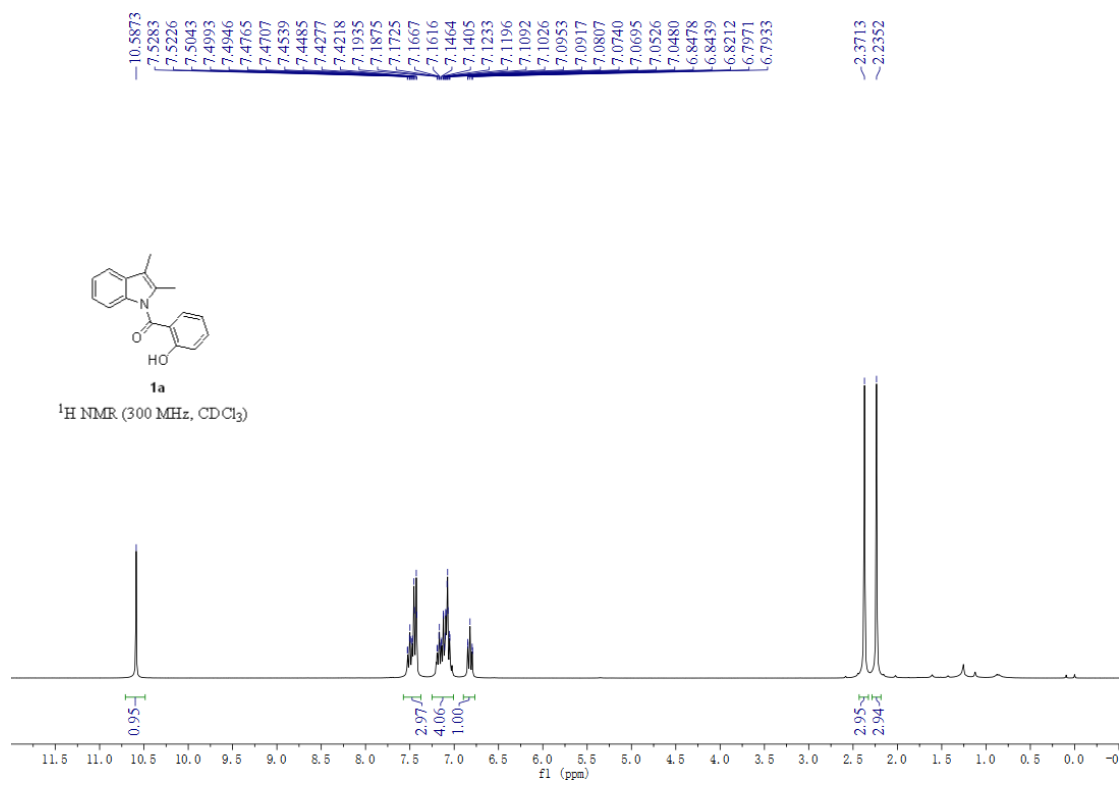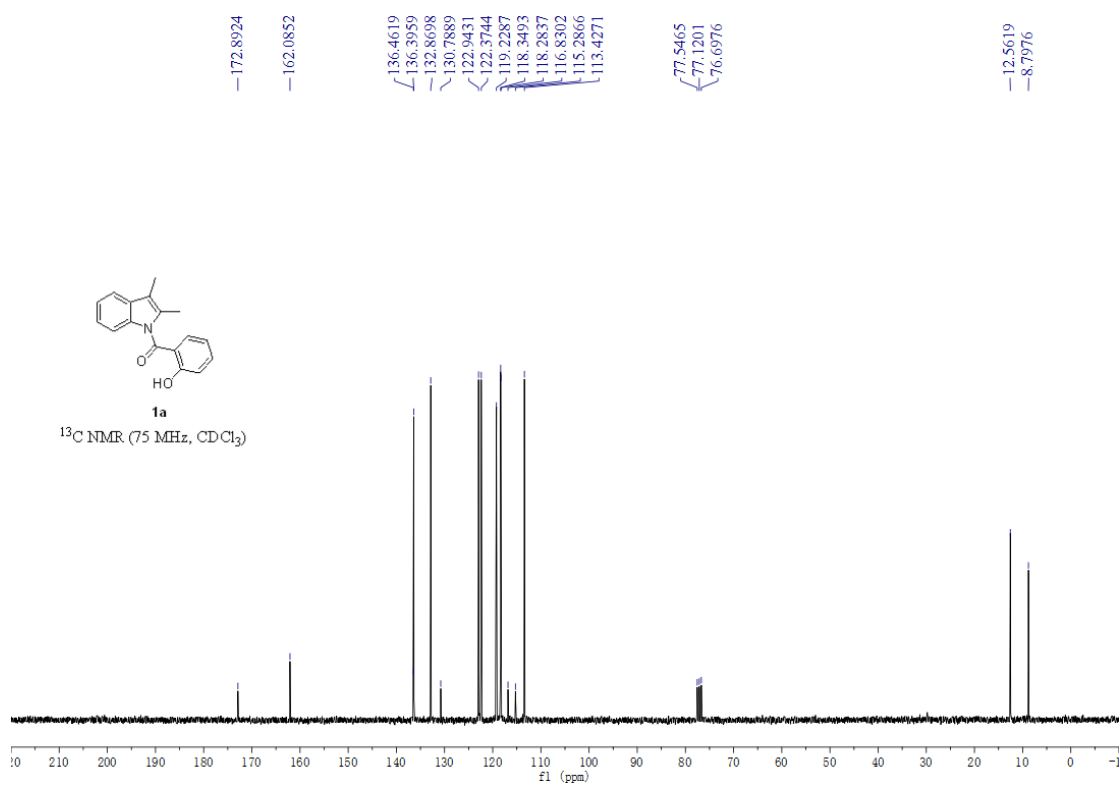

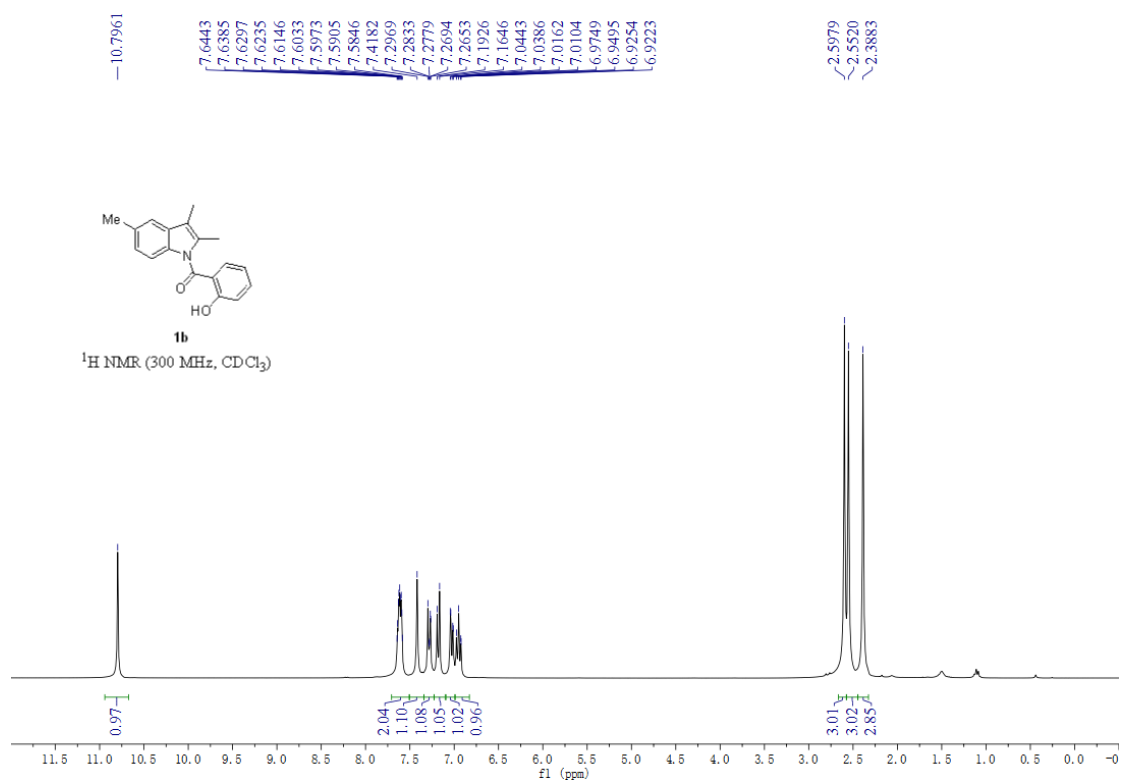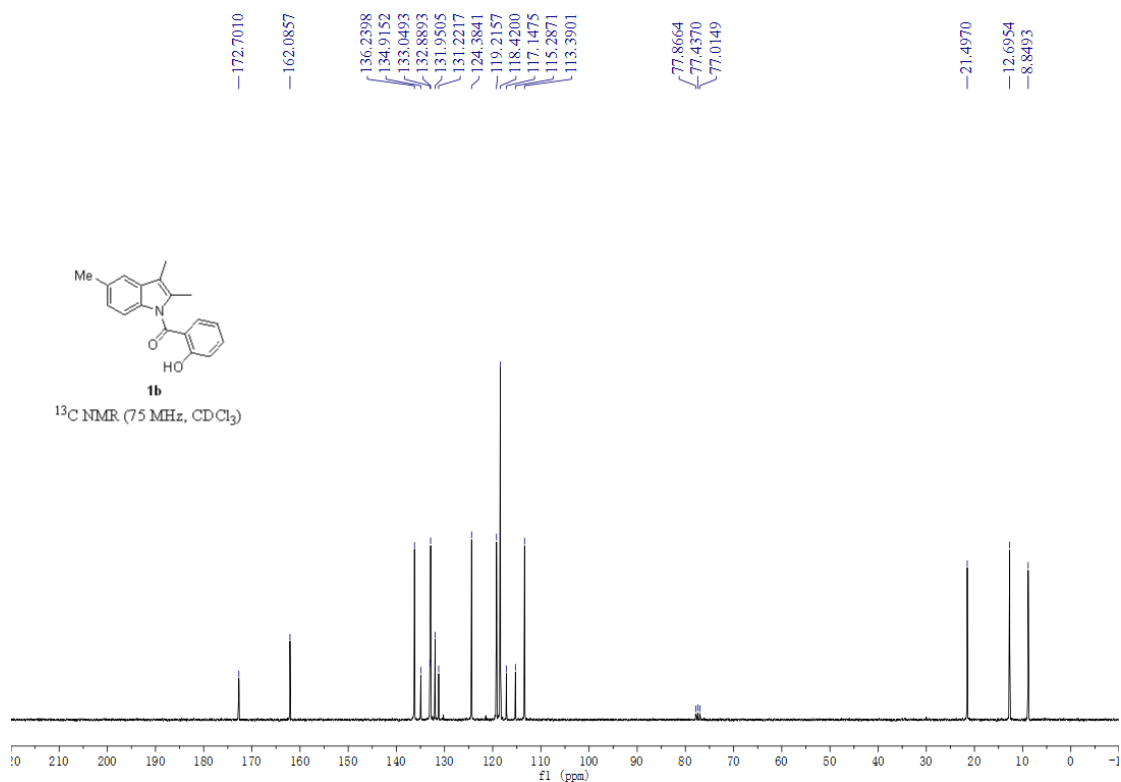

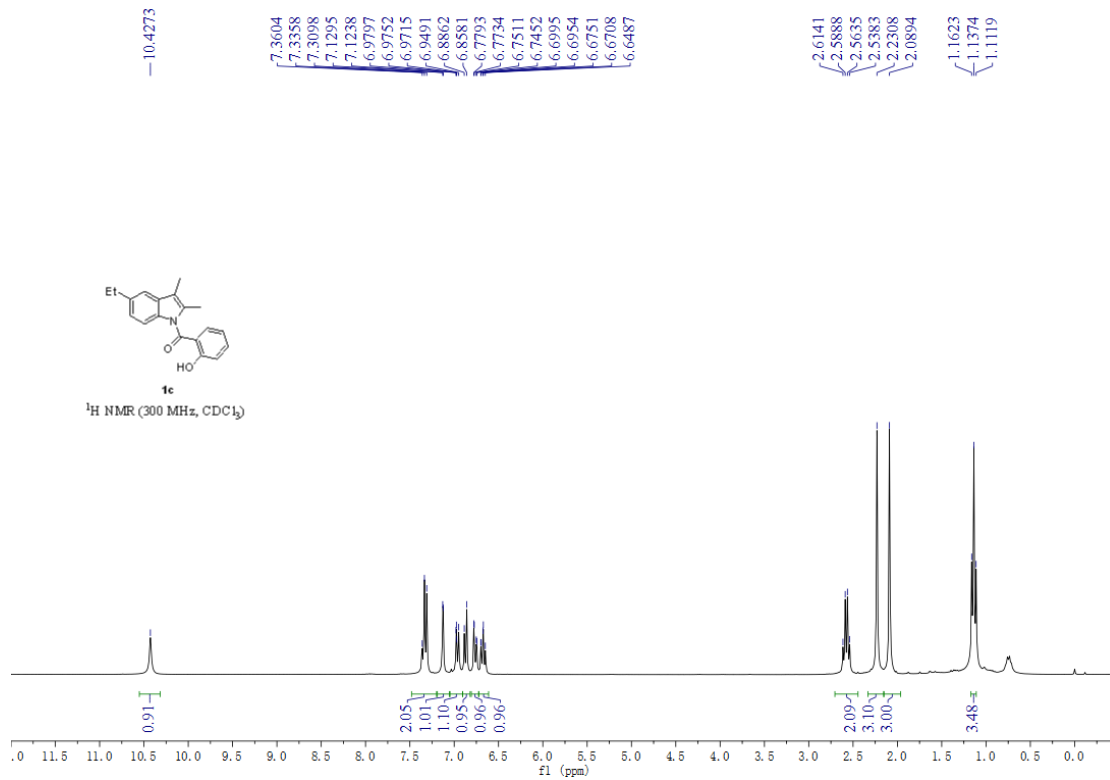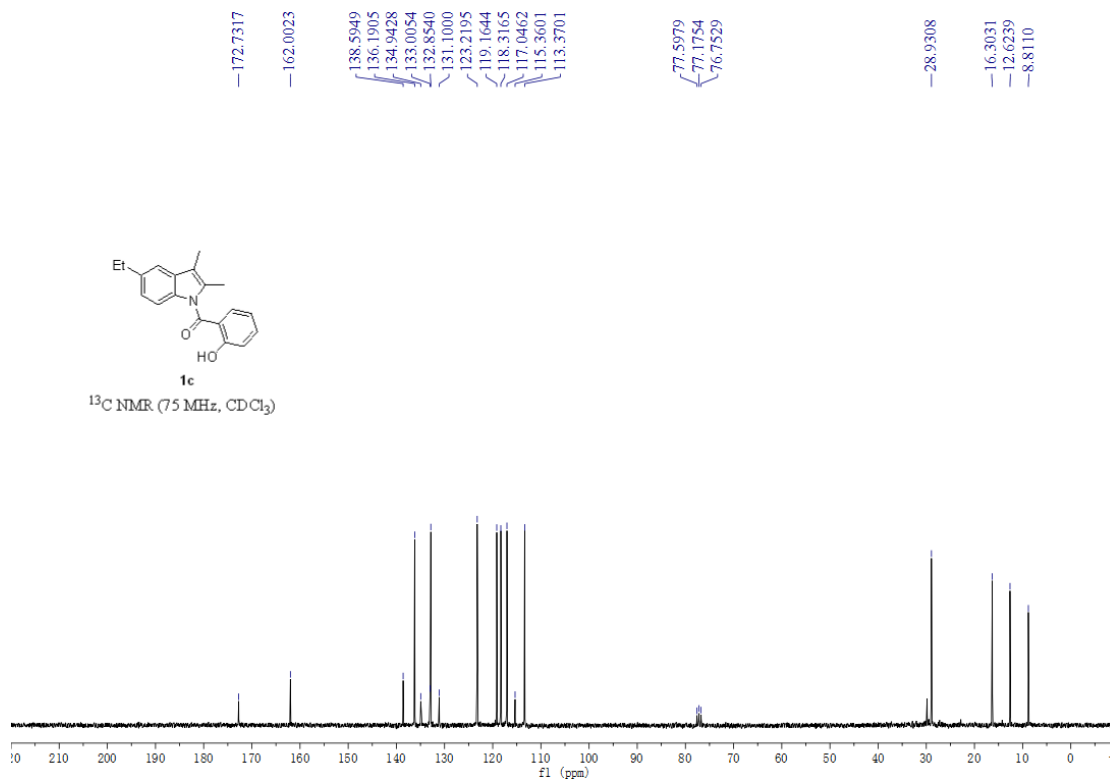

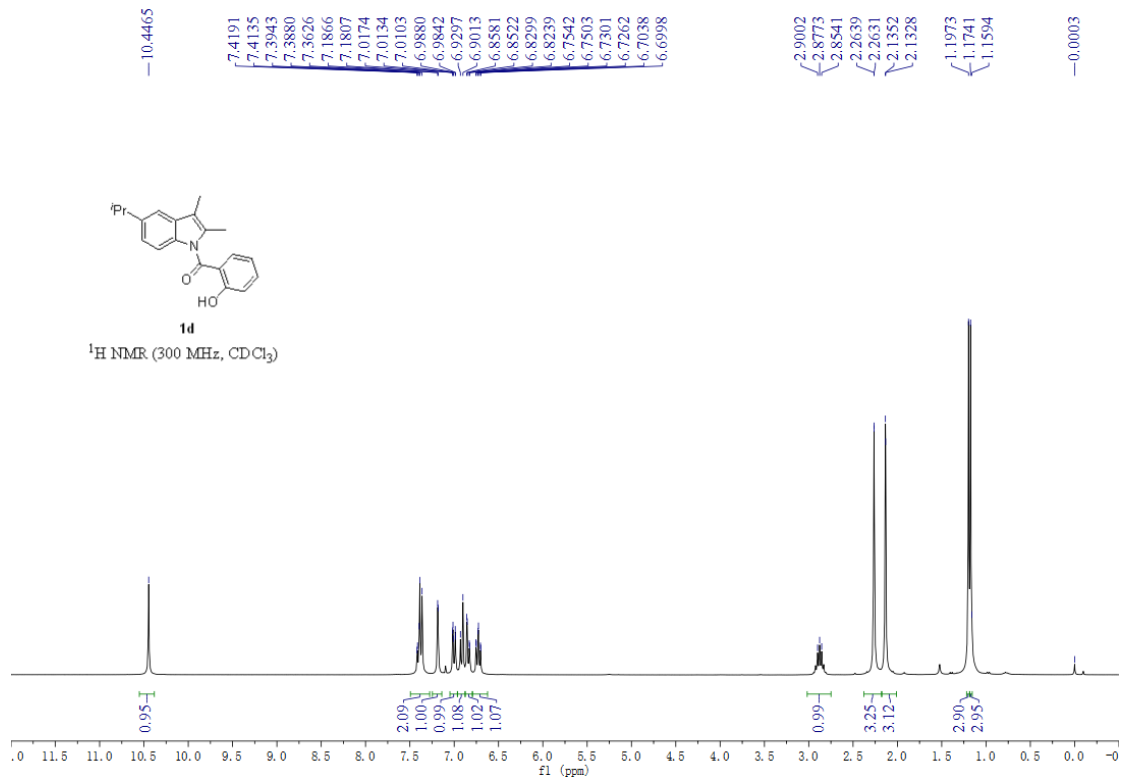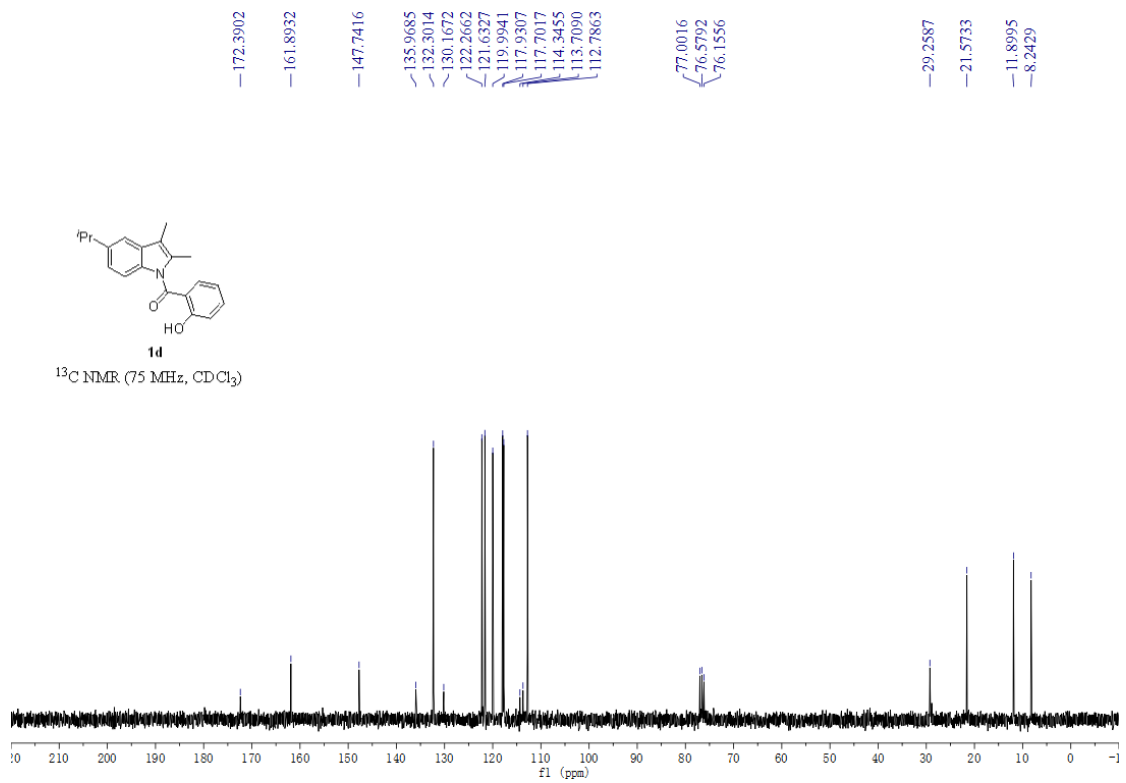

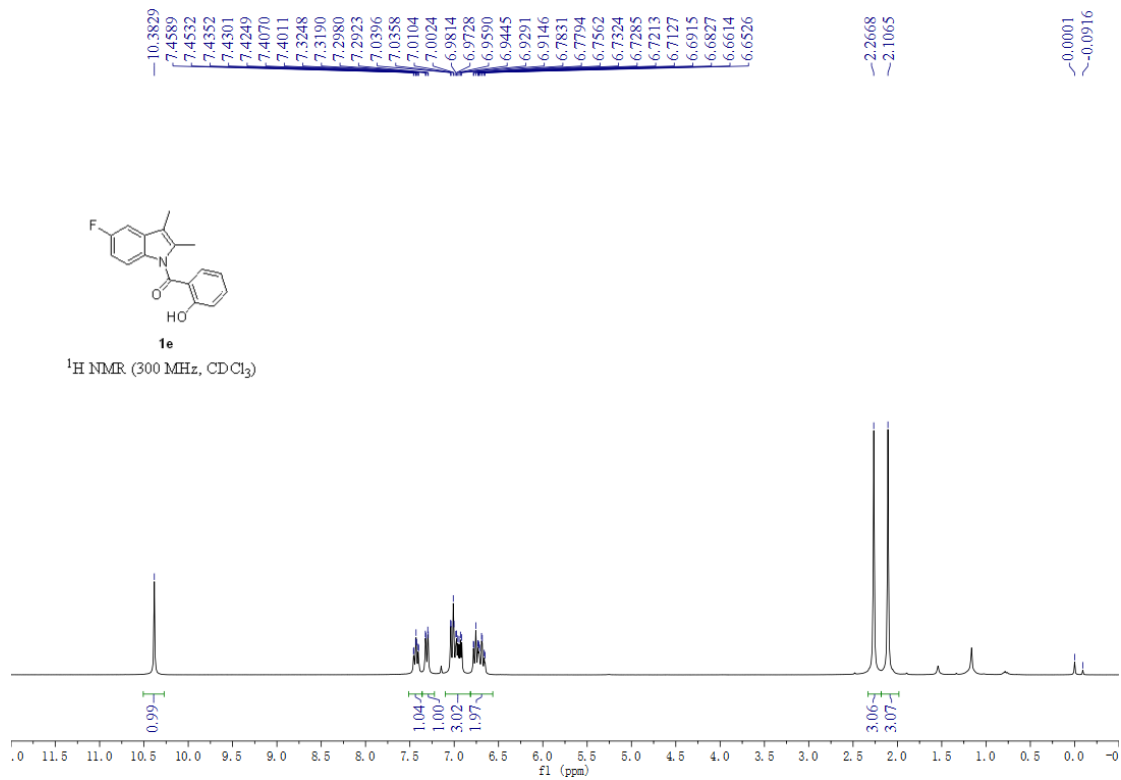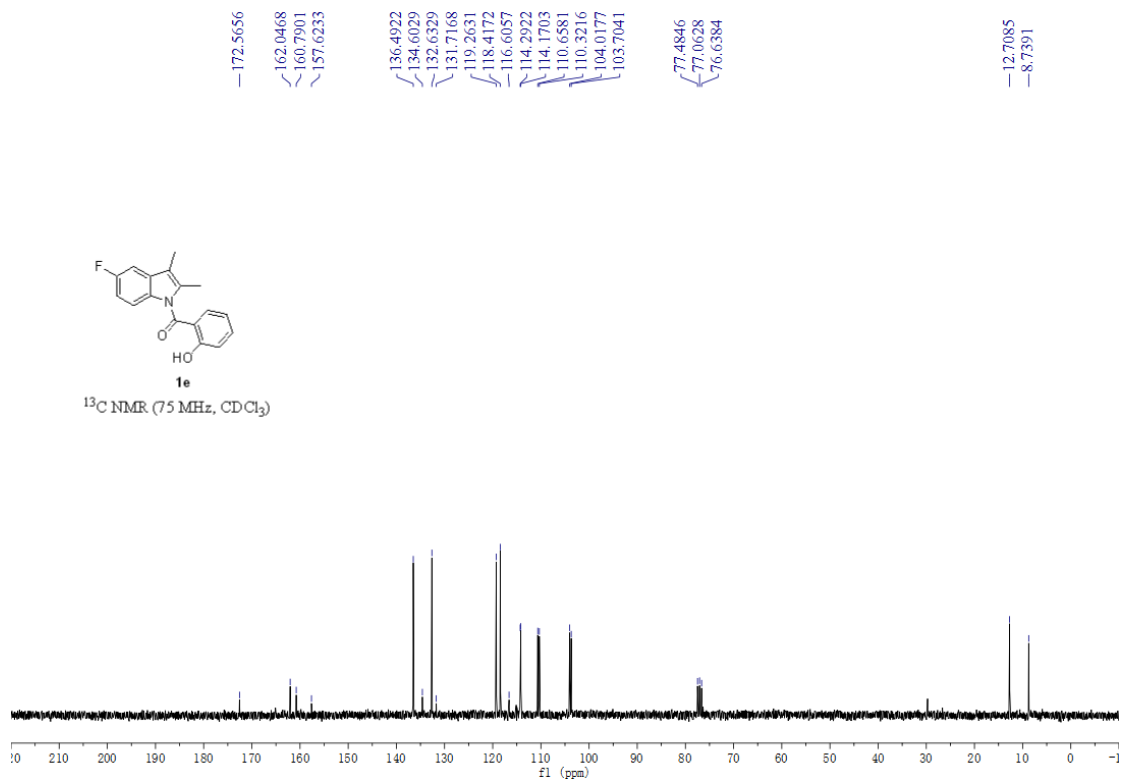

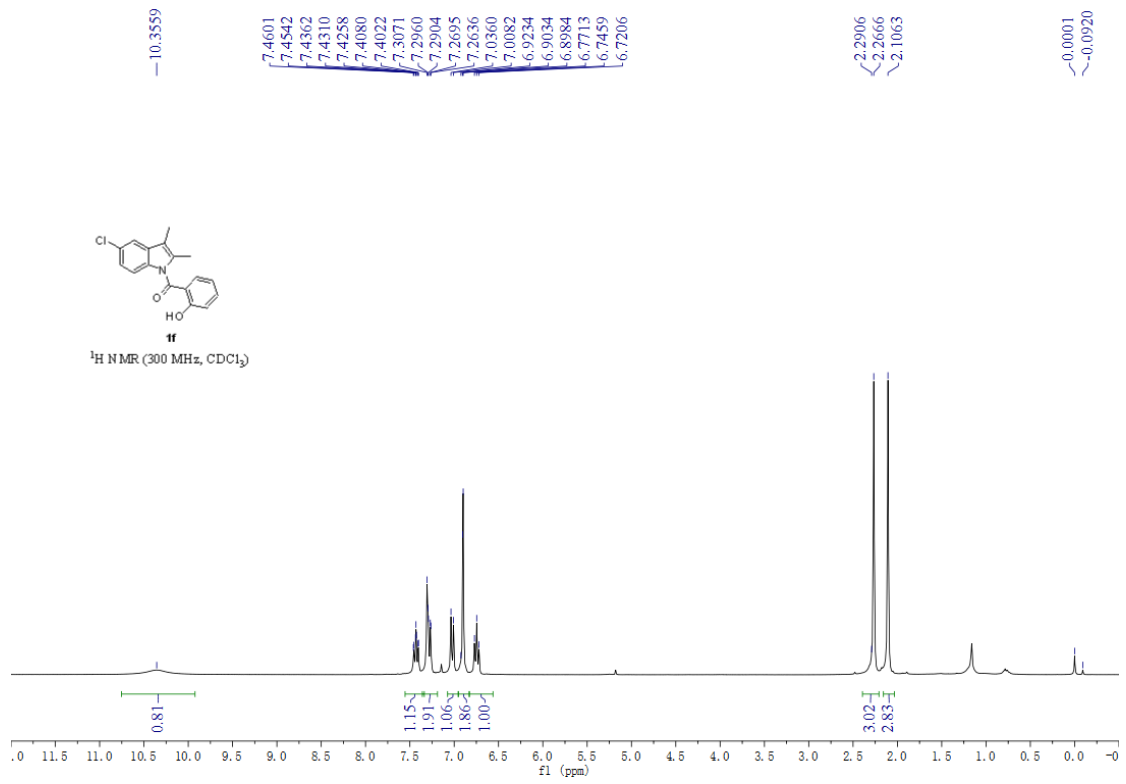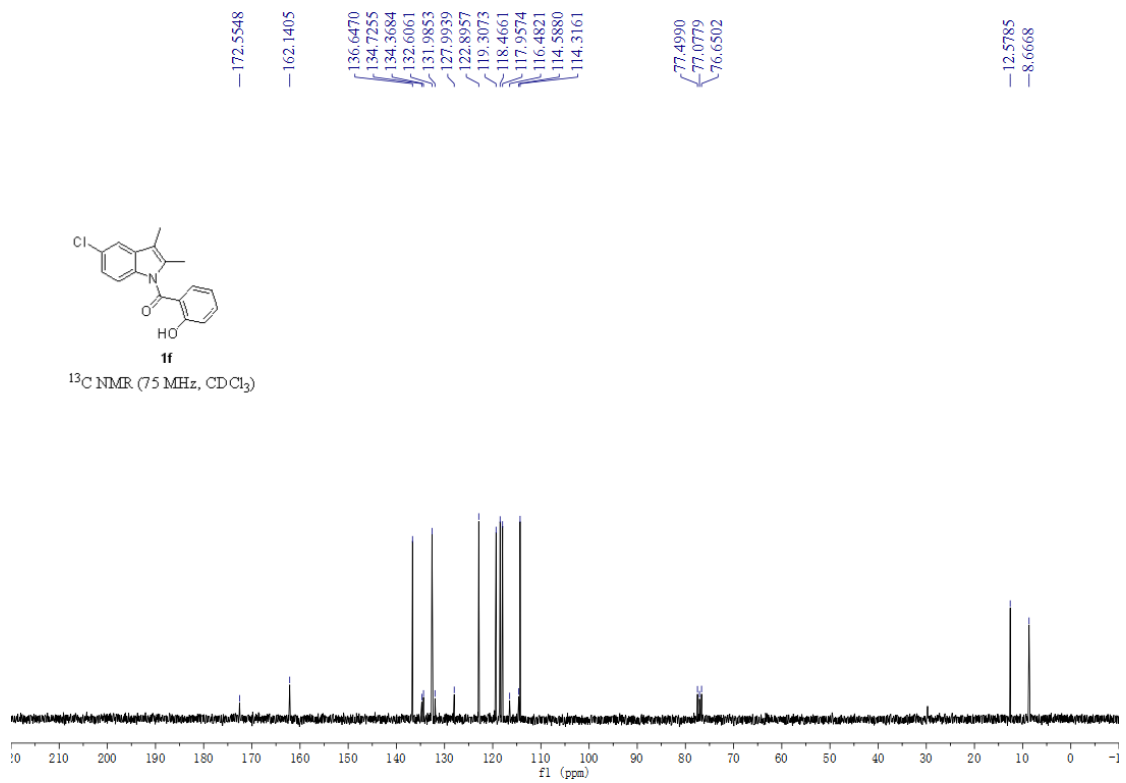

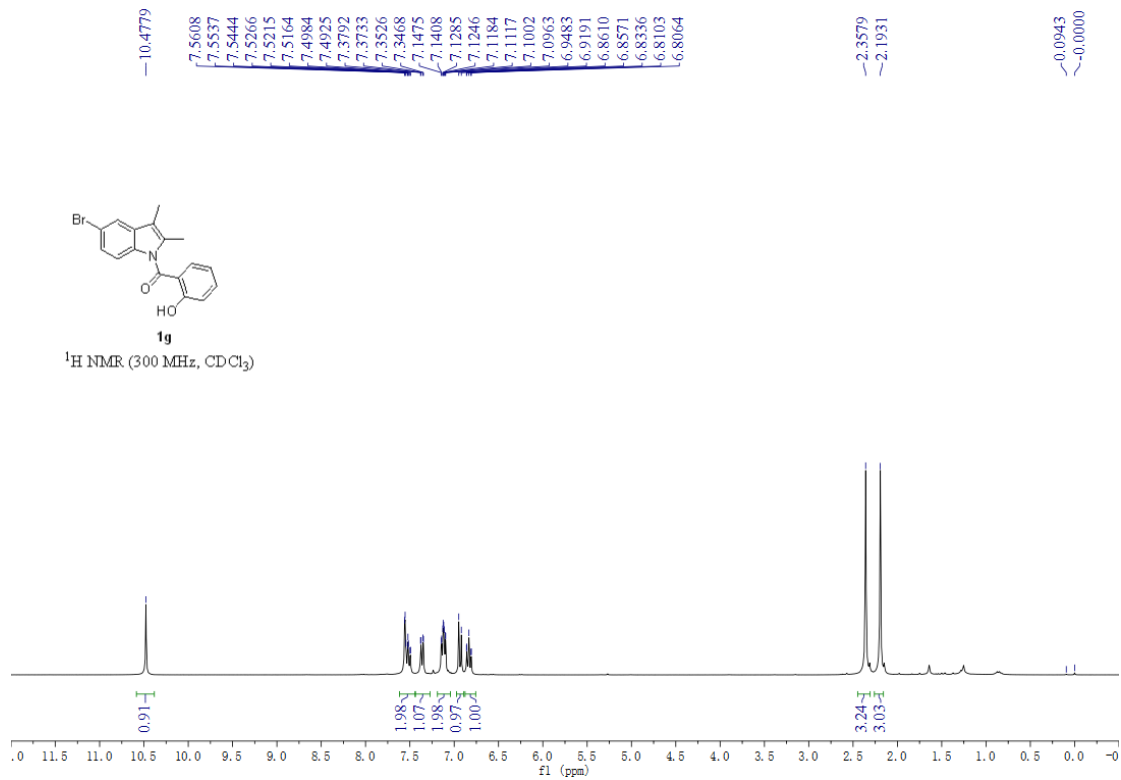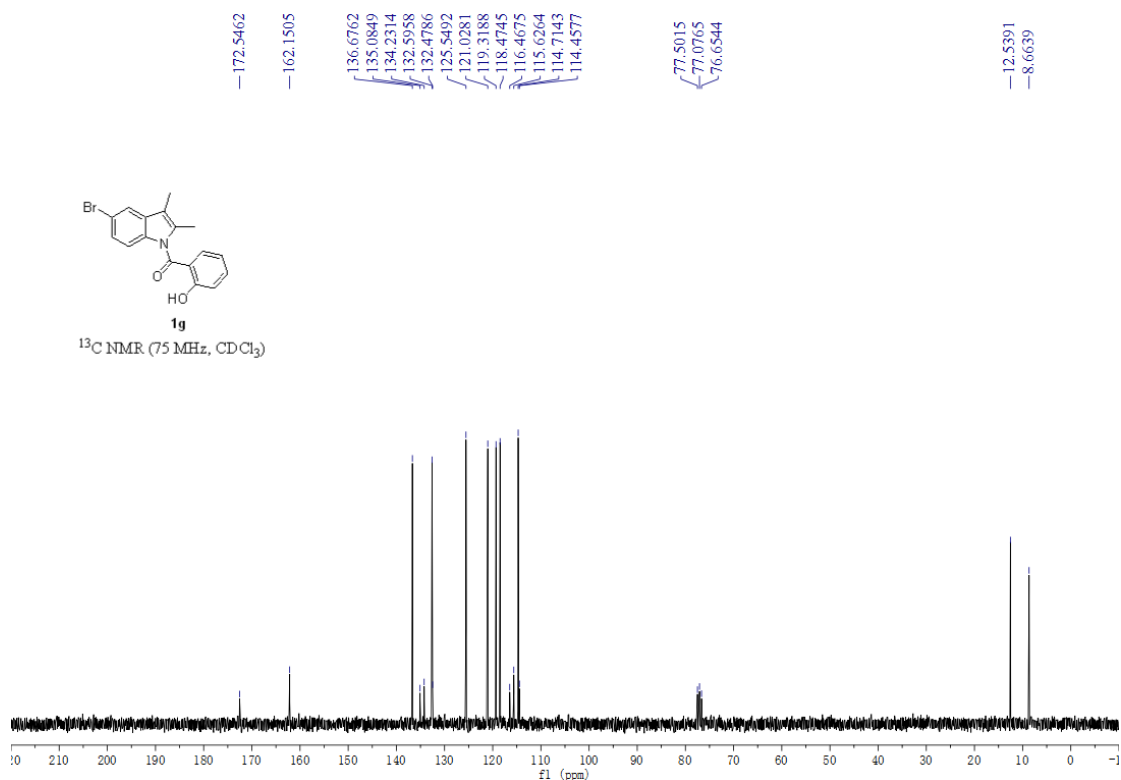



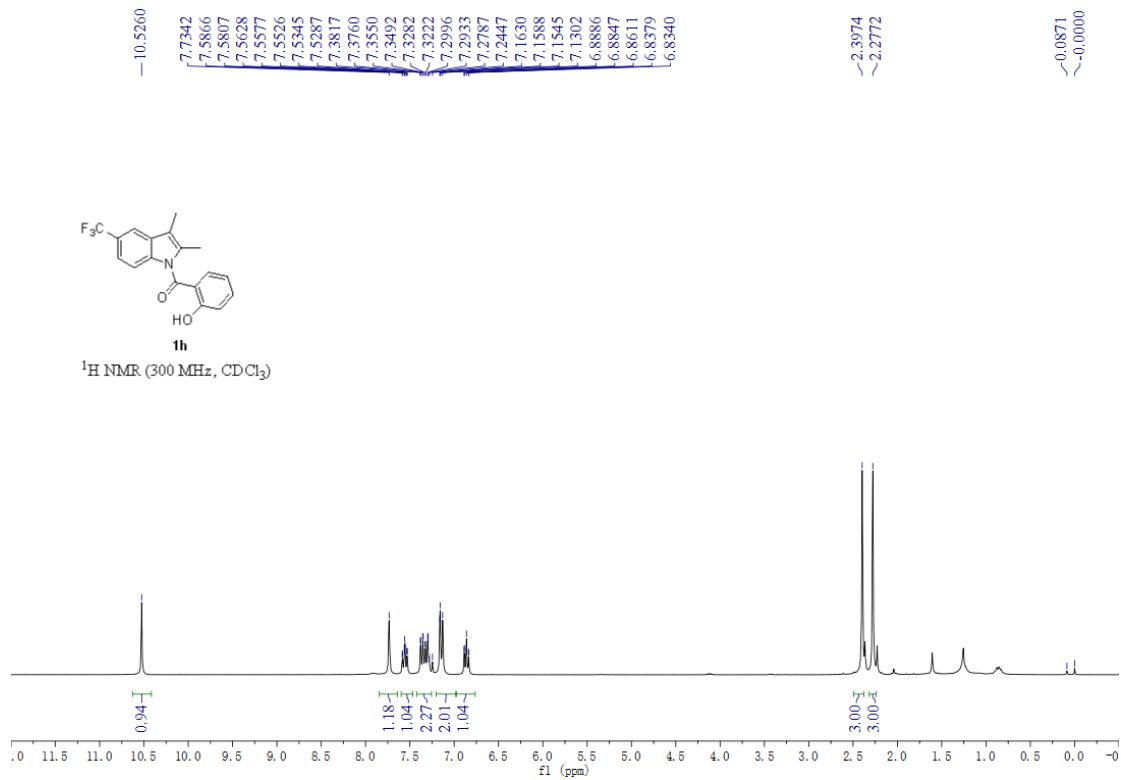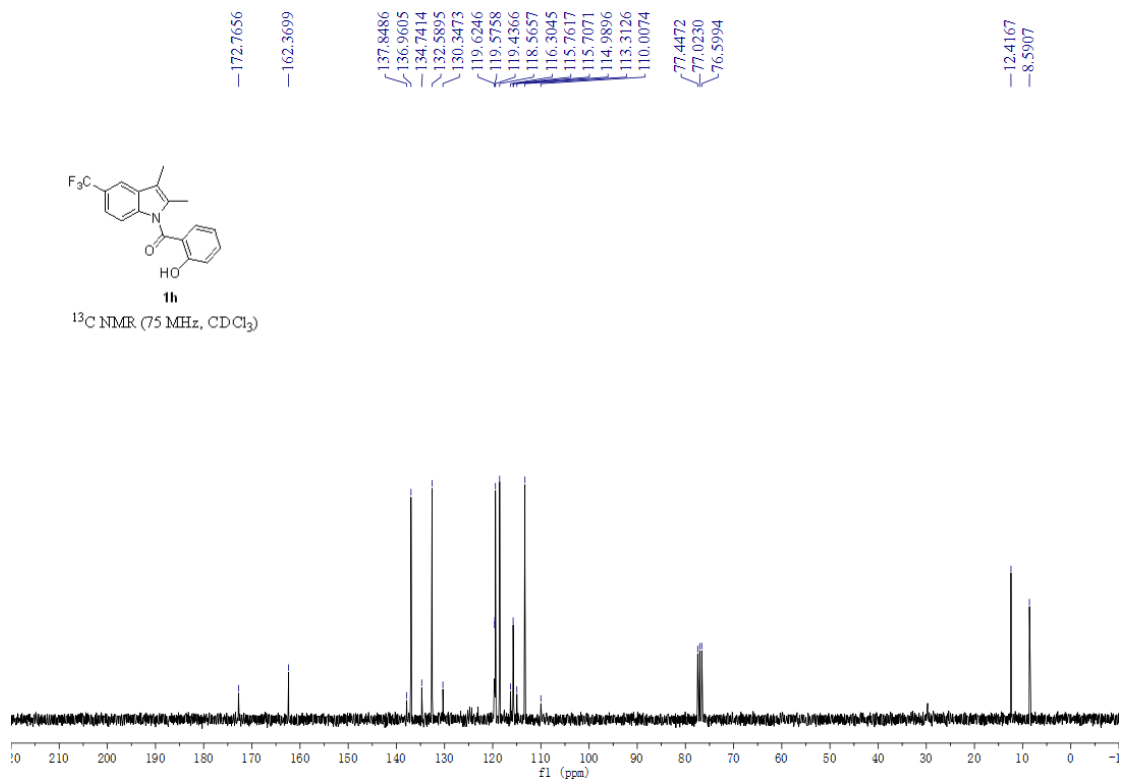

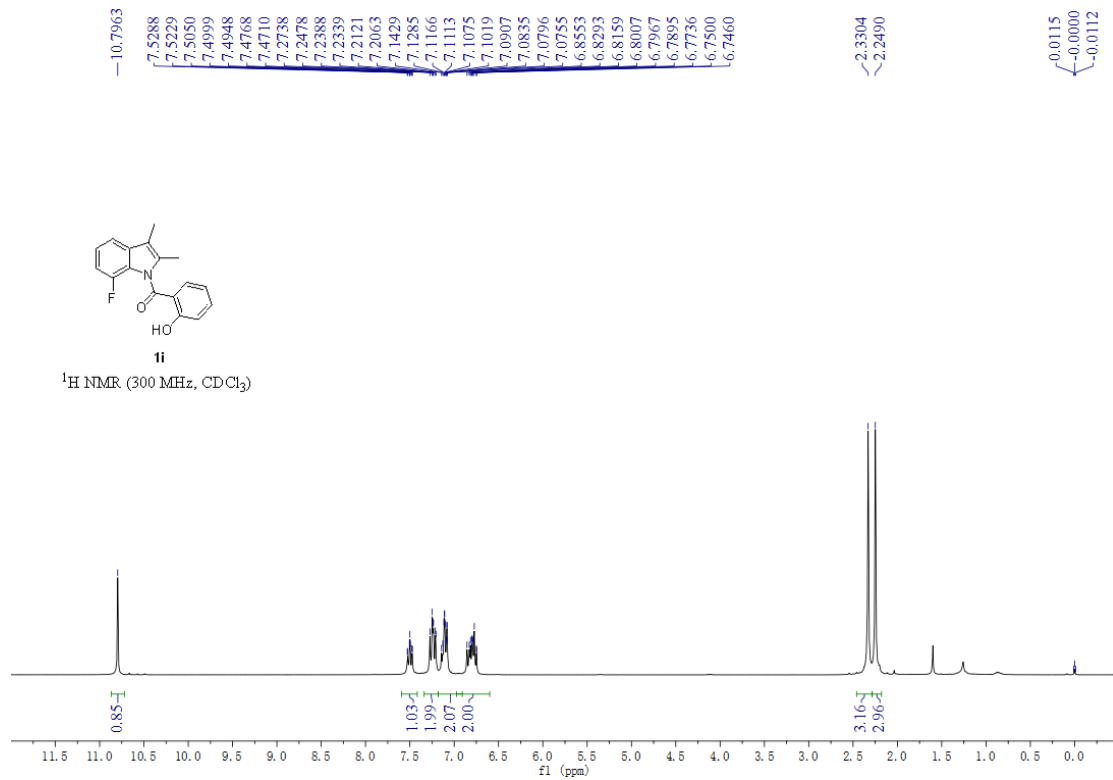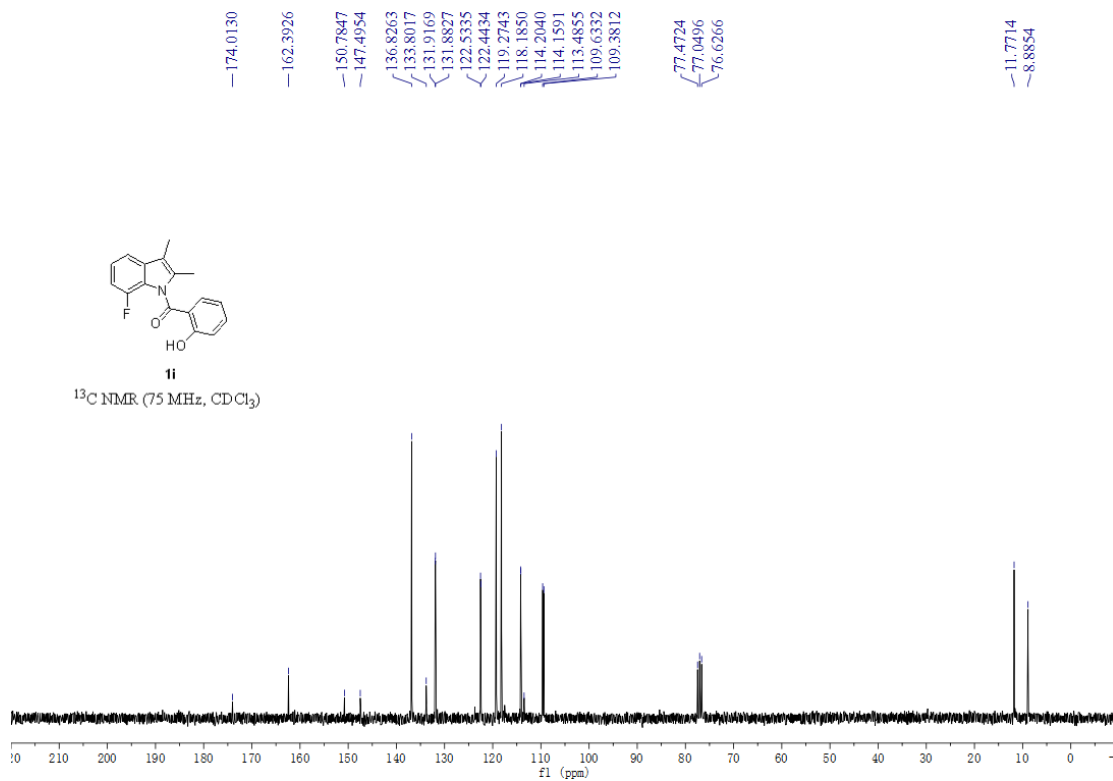

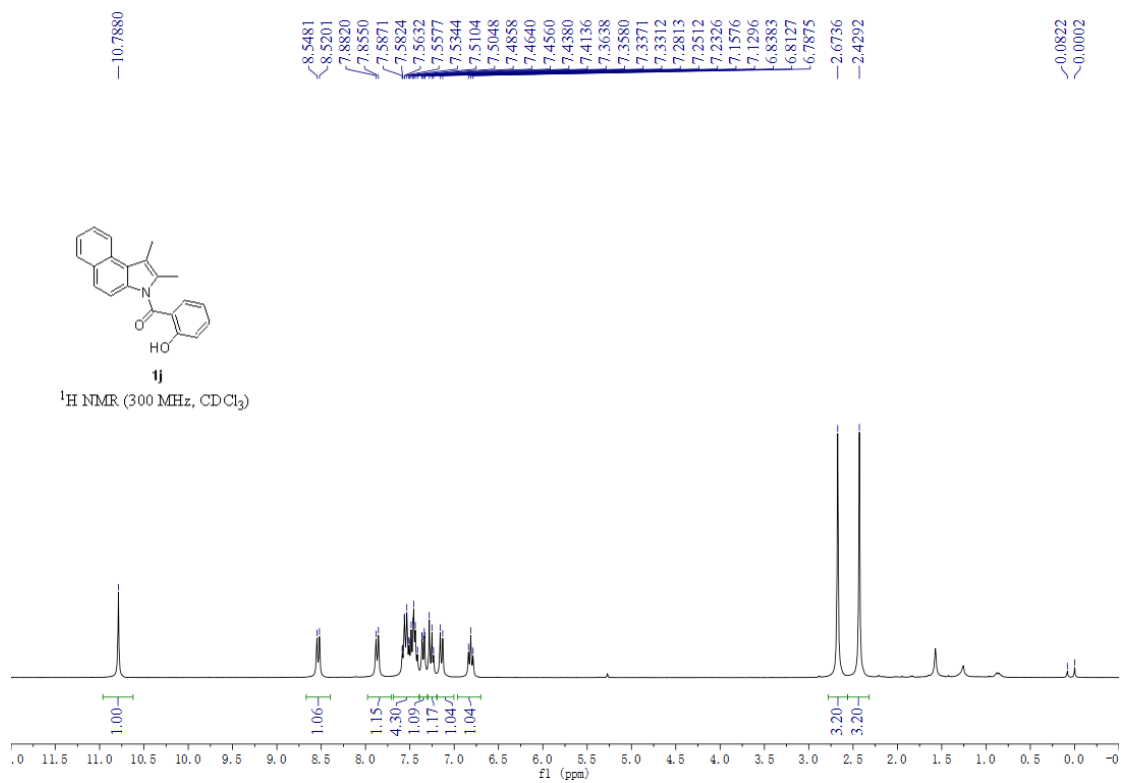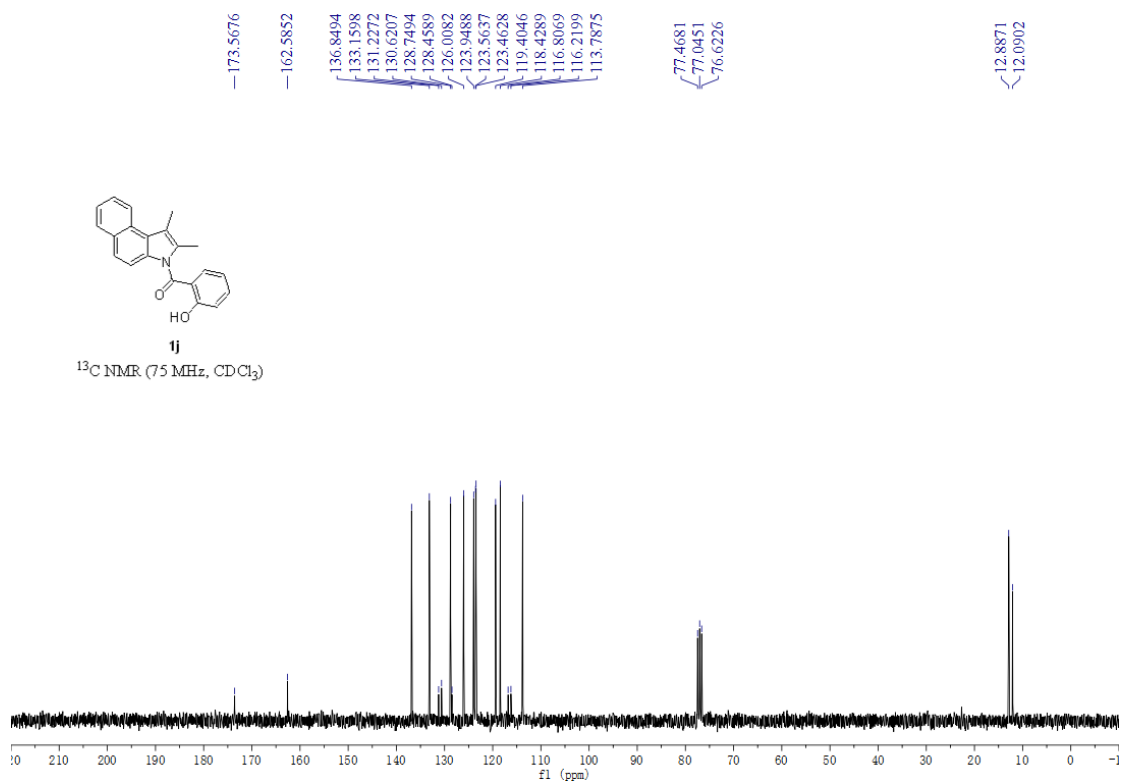

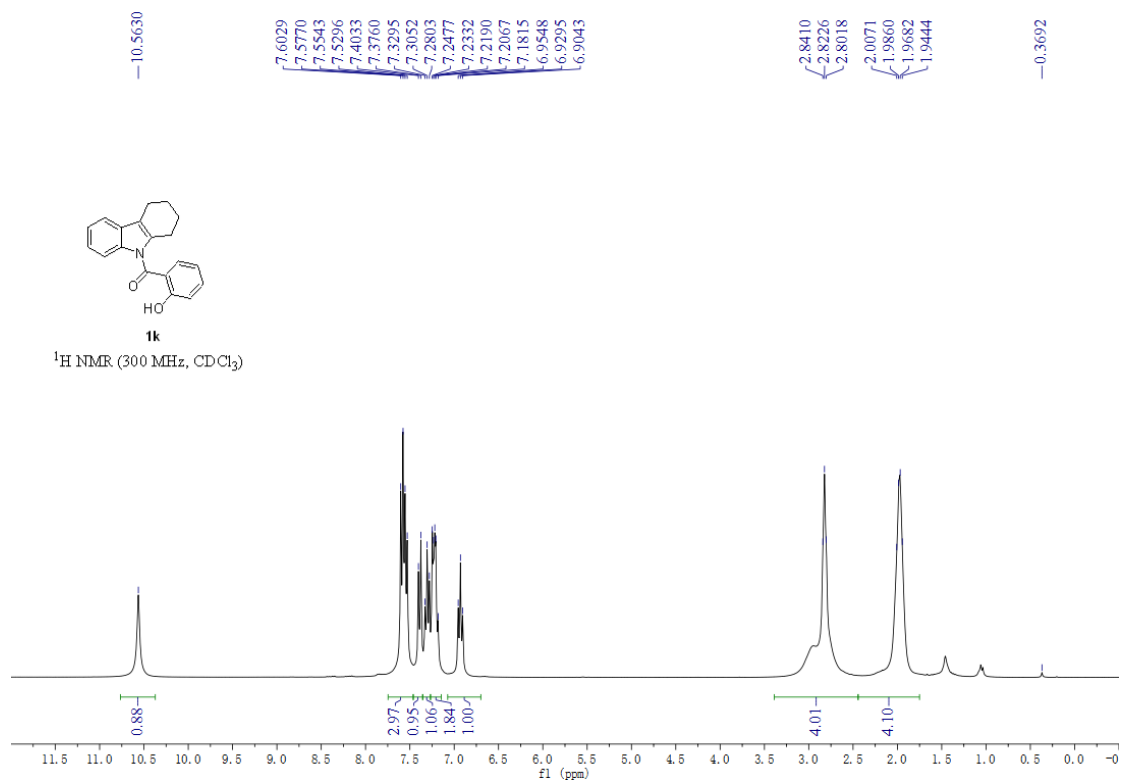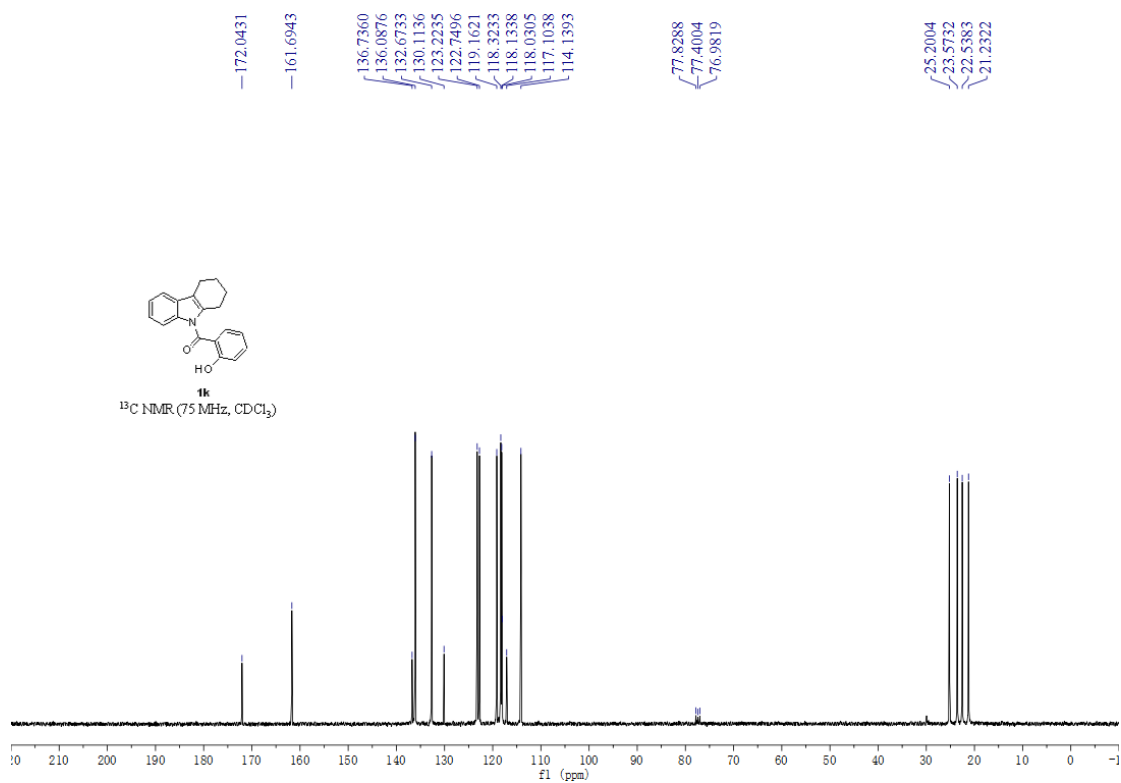

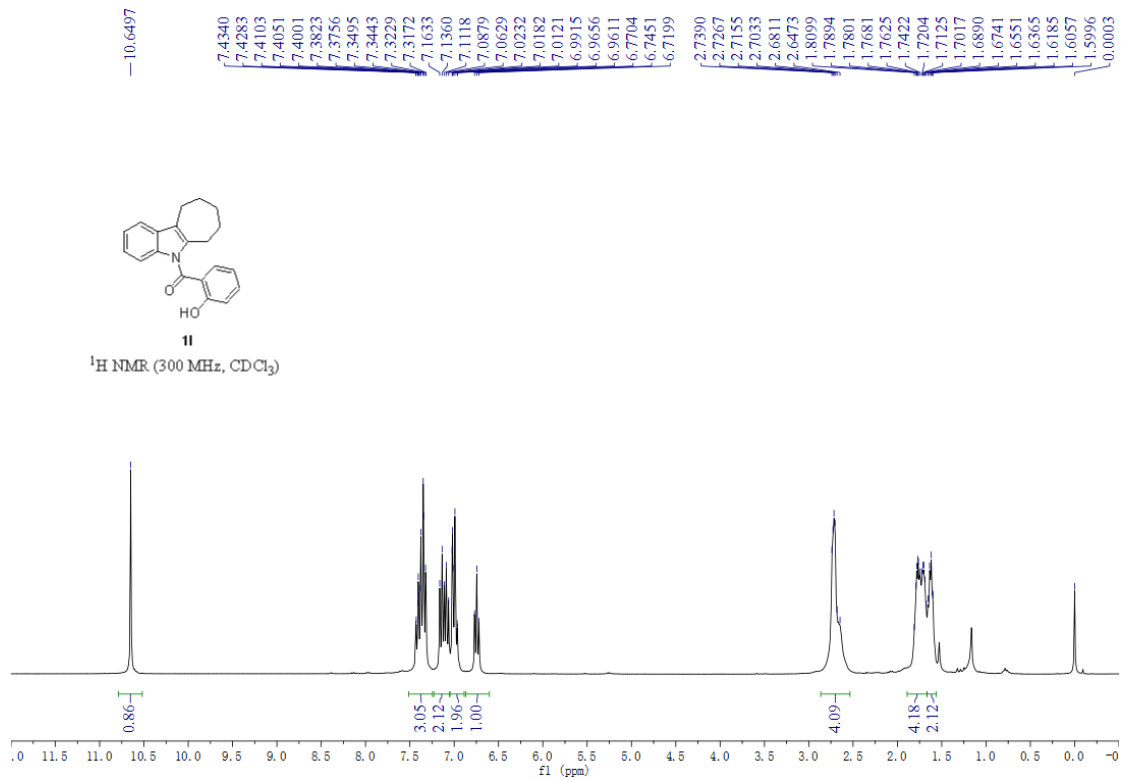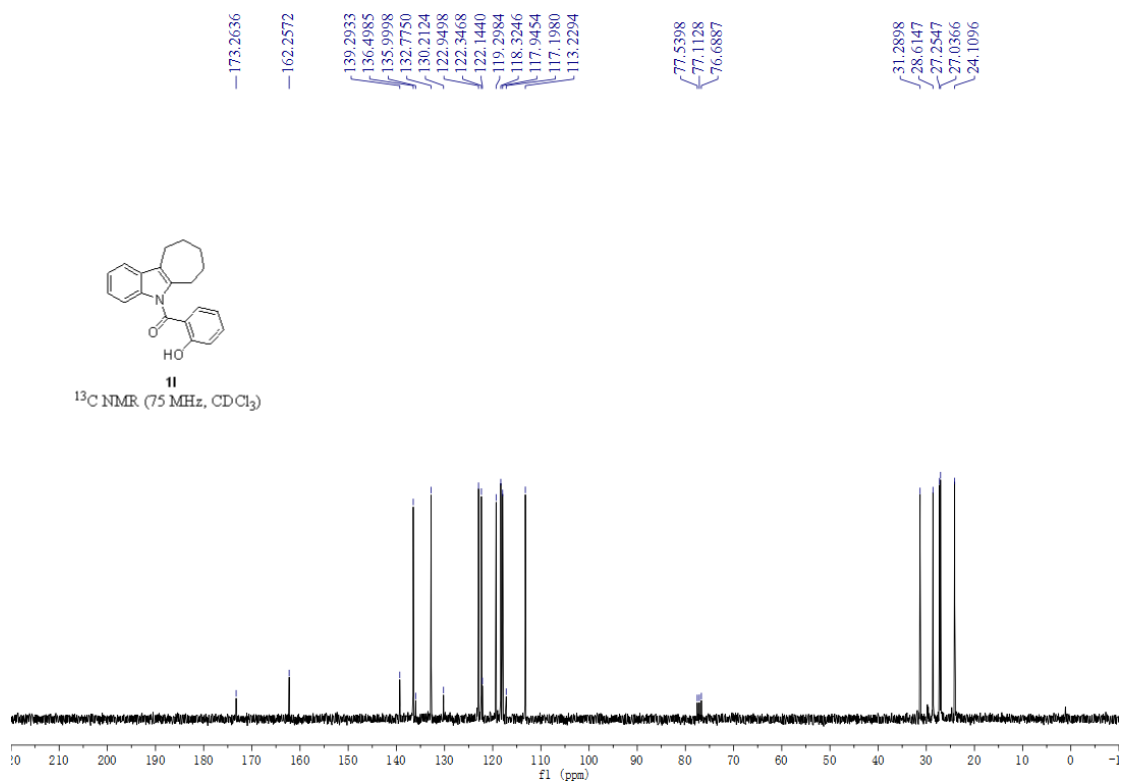

10.6472  
7.5419  
7.5195  
7.5139  
7.4959  
7.4897  
7.4706  
7.4408  
7.4350  
7.4141  
7.4083  
7.1969  
7.1907  
7.1761  
7.1701  
7.1643  
7.1503  
7.1424  
7.1361  
7.1091  
7.0430  
7.0390  
7.0189  
6.8456  
6.8203  
6.7949  
2.9117  
2.8865  
2.8649  
2.8439  
2.8359  
2.8184  
1.7740  
1.7654  
1.7476  
1.7311  
1.7239  
1.7129  
1.7035  
1.5705  
1.5232  
1.5037  
1.4871  
1.4691  
1.4215  
1.3929  
1.2659  
1.2561

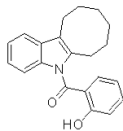

1m

<sup>1</sup>H NMR (300 MHz, CDCl<sub>3</sub>)

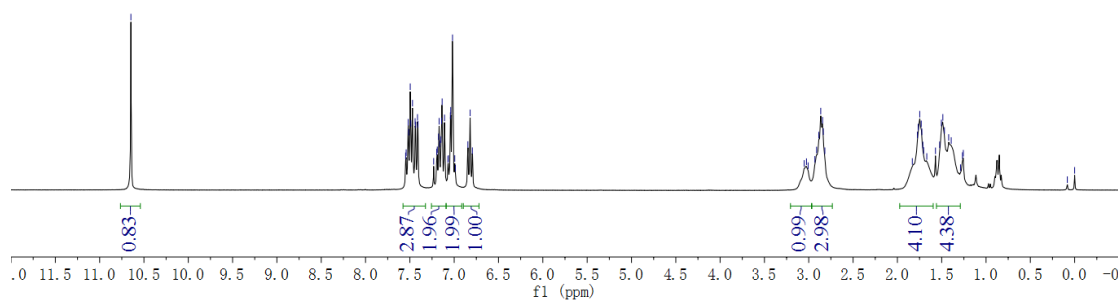

172.9423  
162.2117  
137.5510  
136.7409  
136.4472  
132.8034  
129.5525  
122.6133  
122.1761  
120.3960  
119.2636  
118.3604  
118.0512  
116.6799  
113.6072  
77.4832  
77.0569  
76.6344  
29.9096  
29.7916  
26.4625  
25.7511  
24.1833  
22.8241

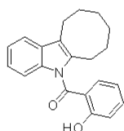

1m

<sup>13</sup>C NMR (75 MHz, CDCl<sub>3</sub>)

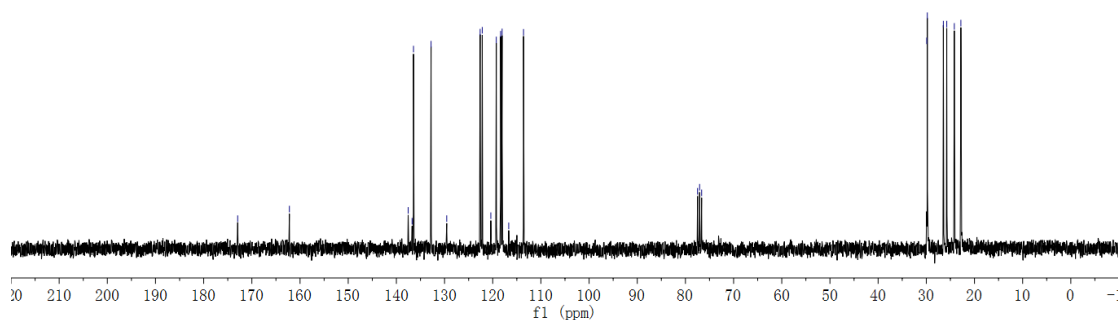

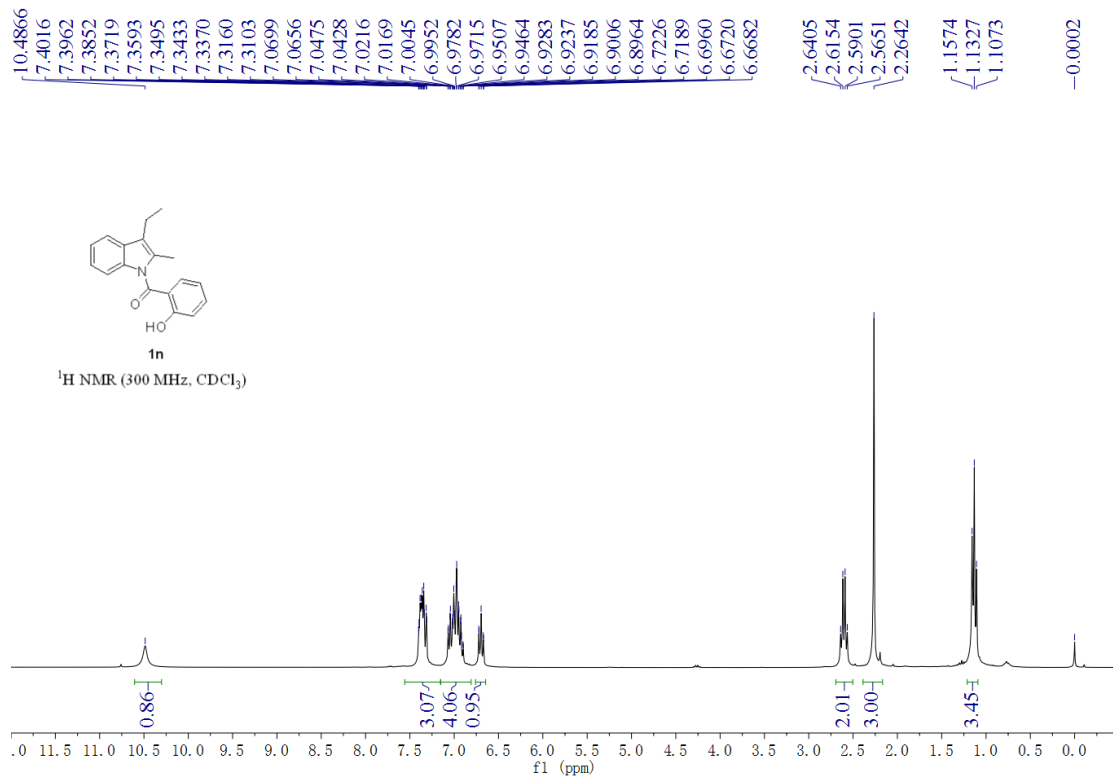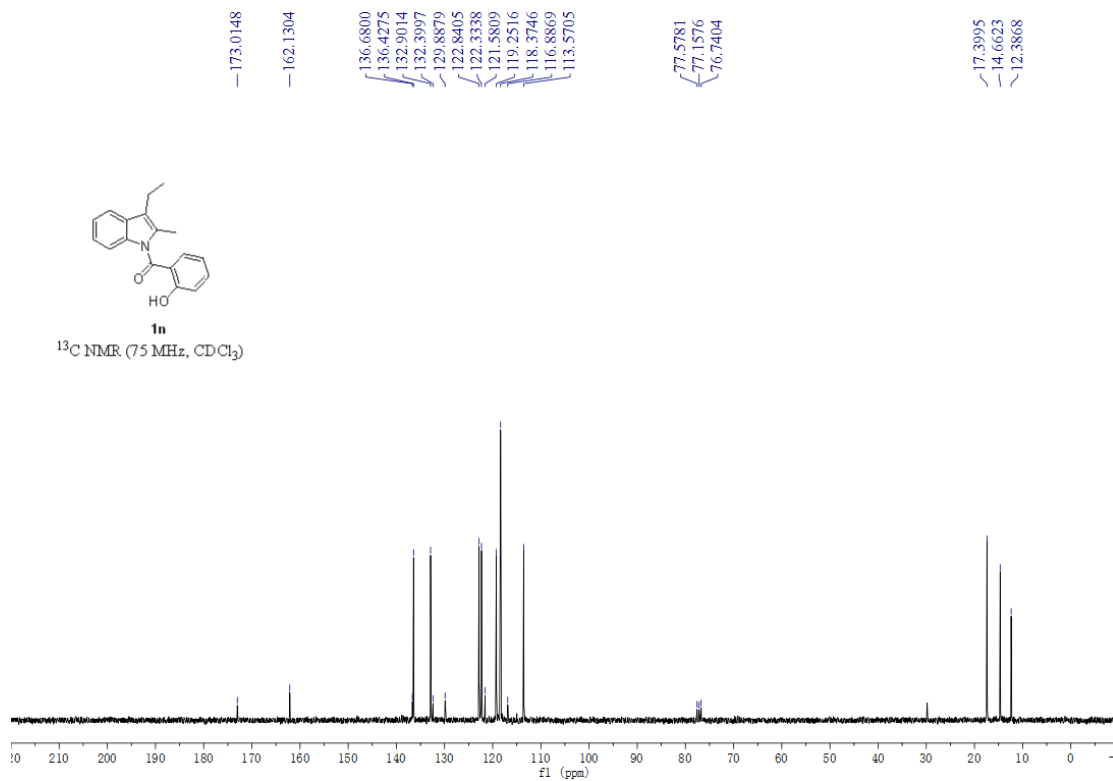

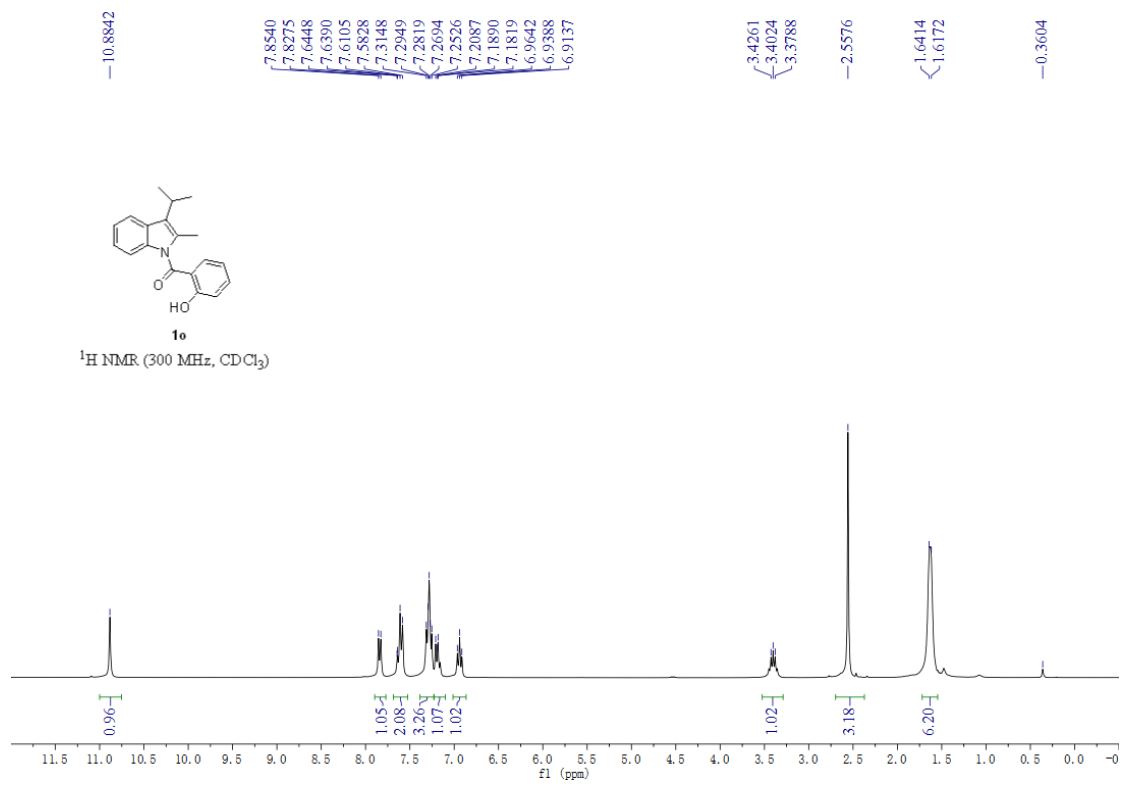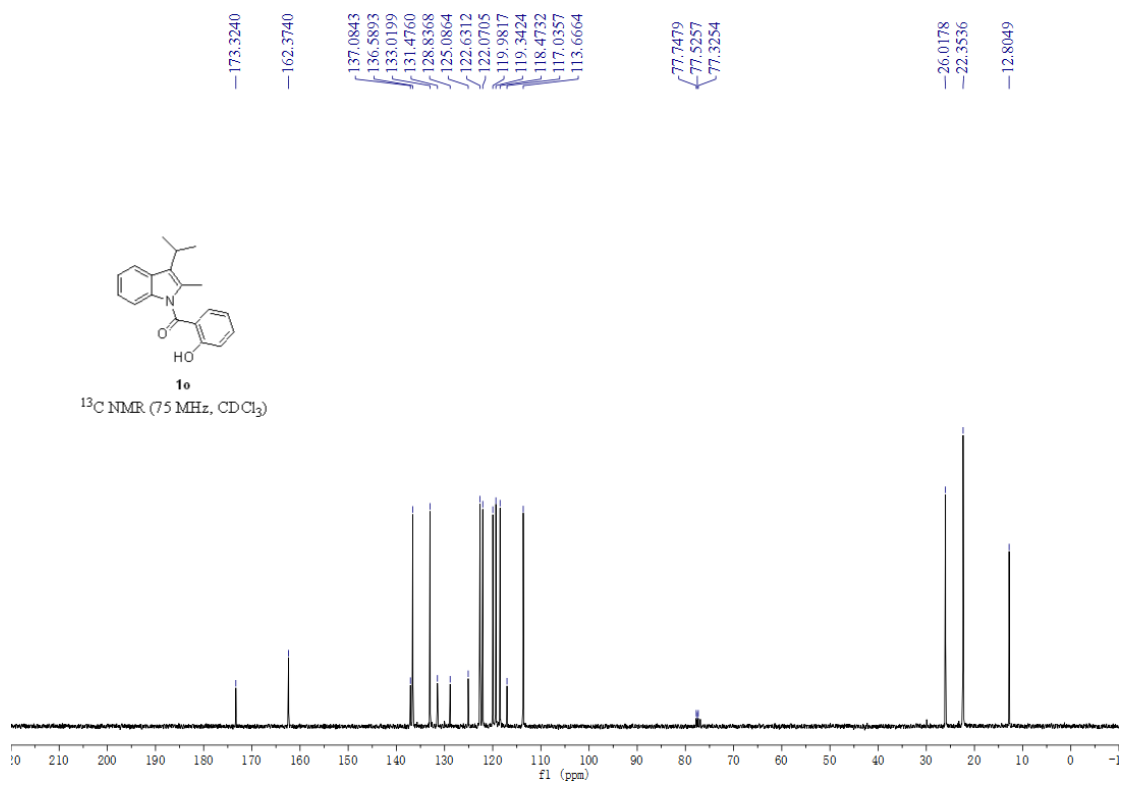



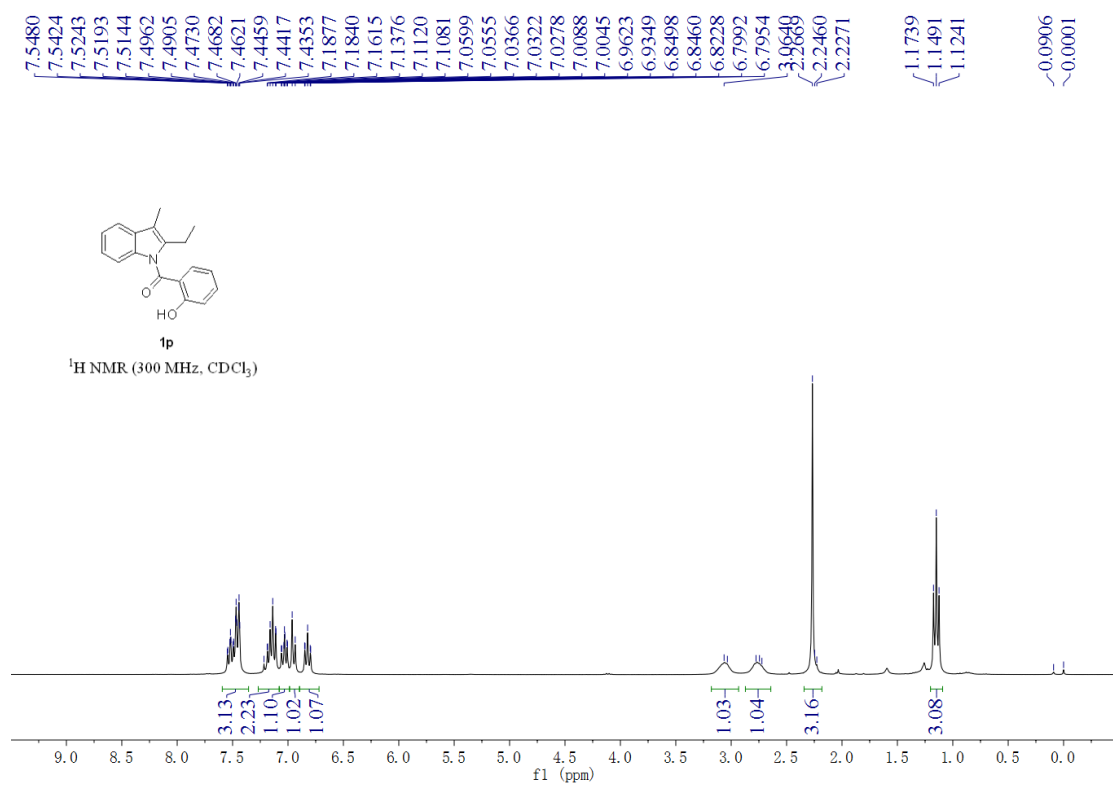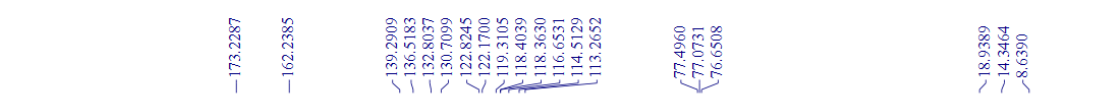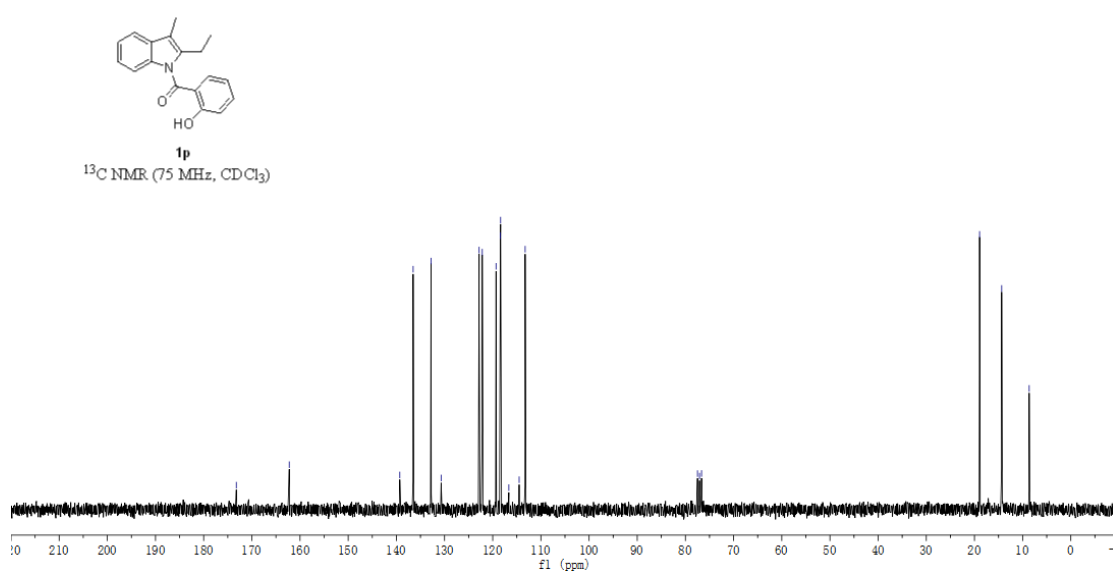

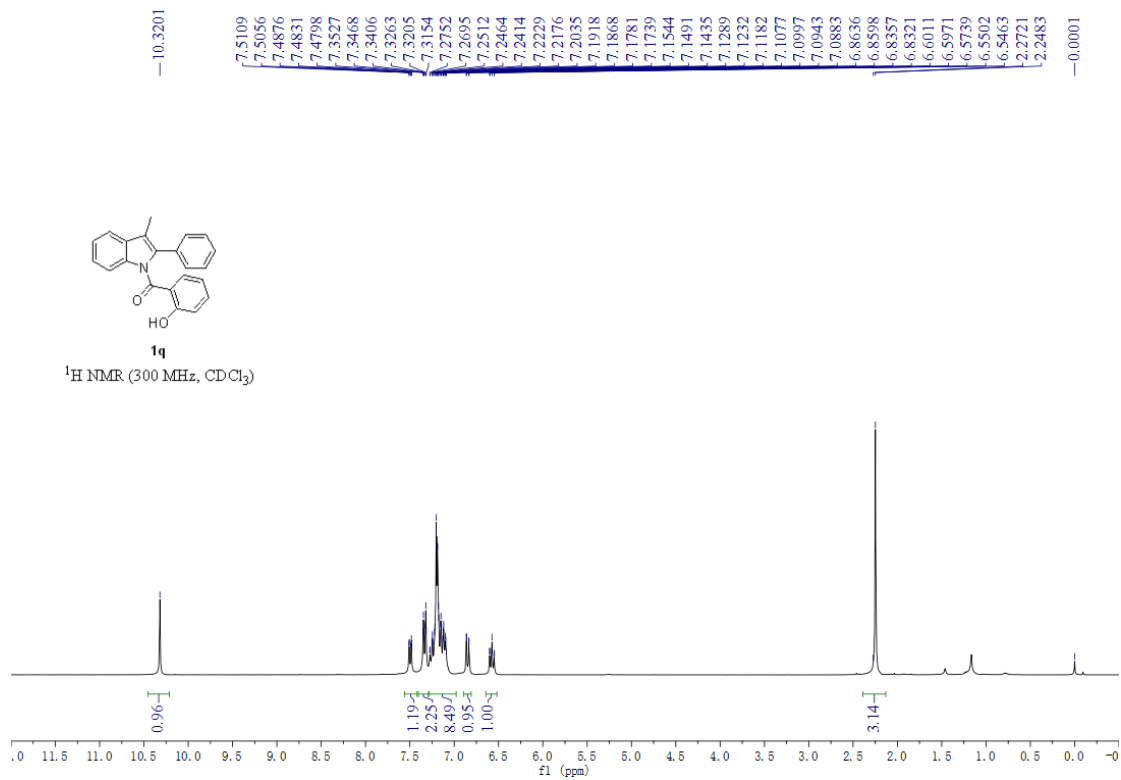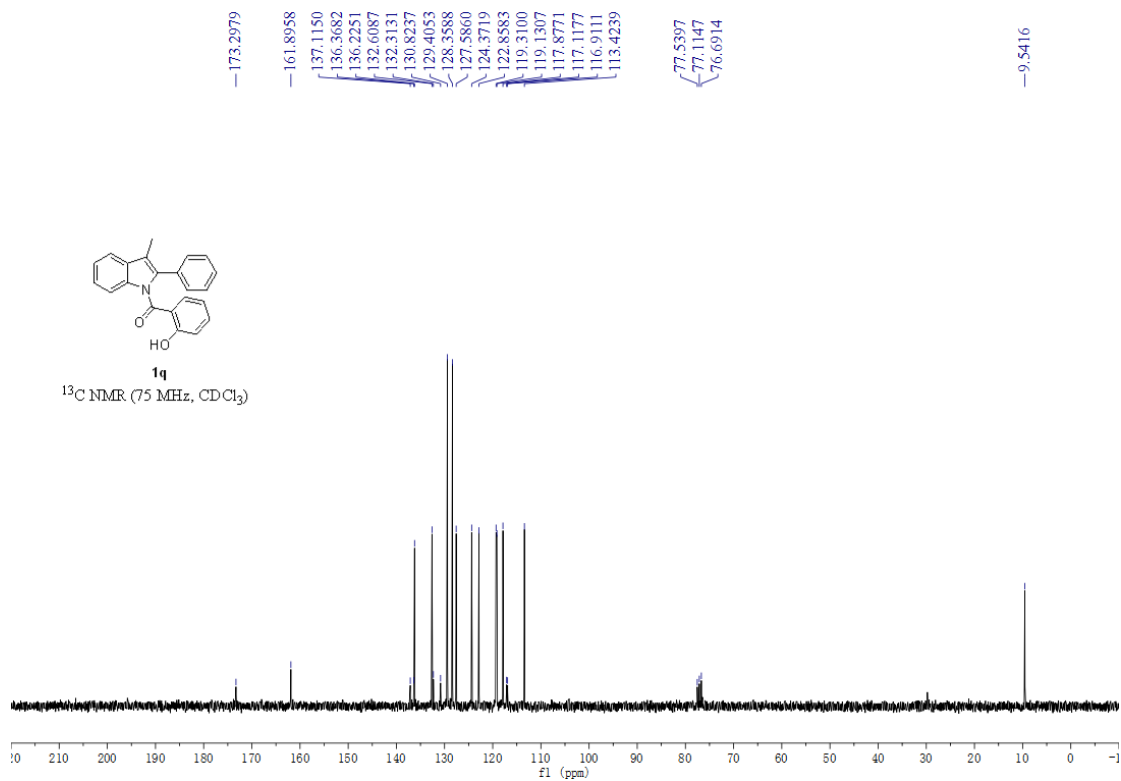

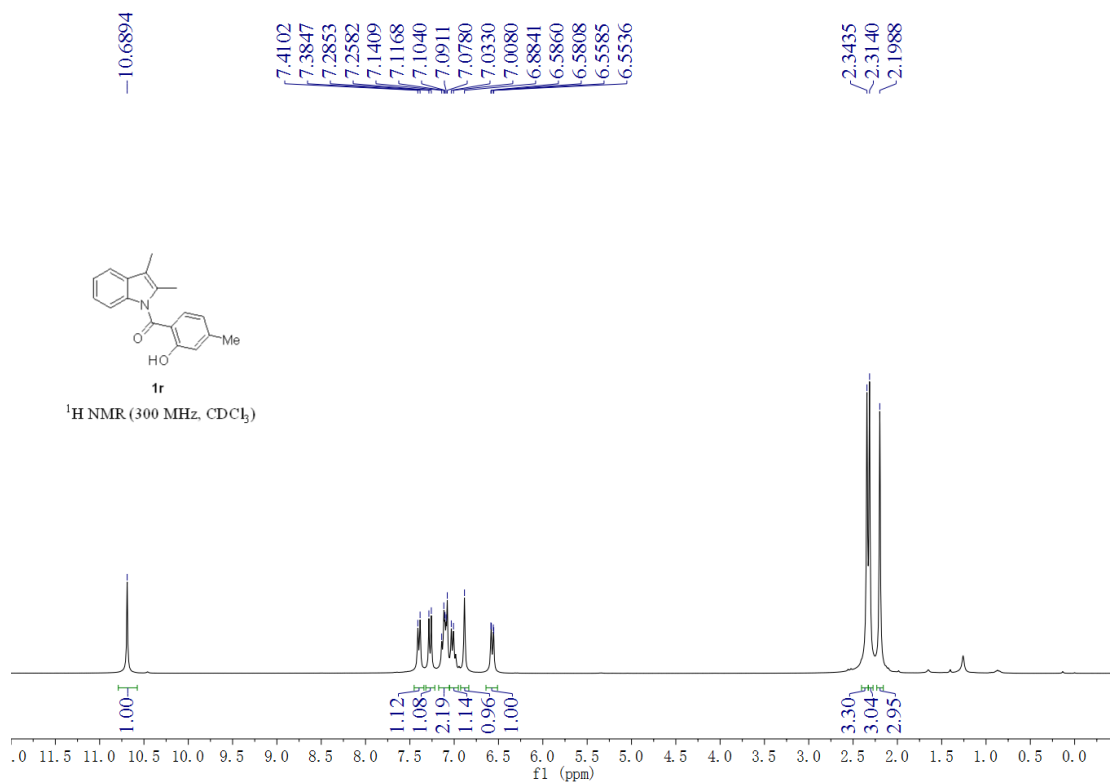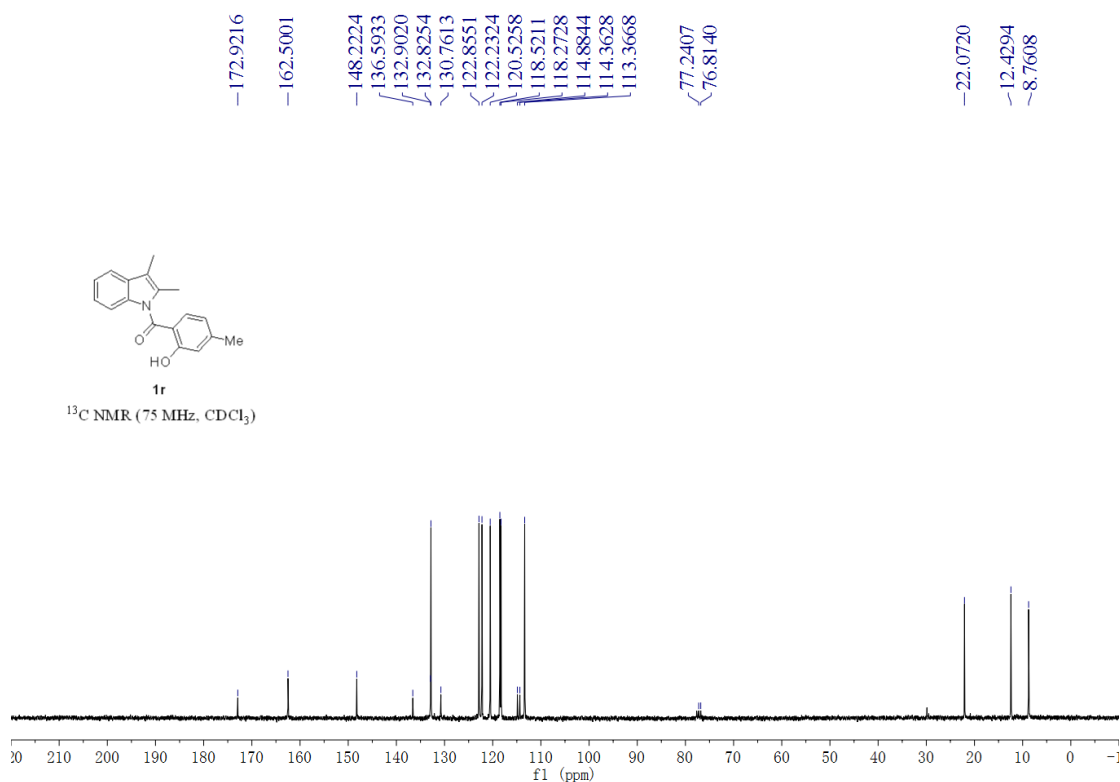

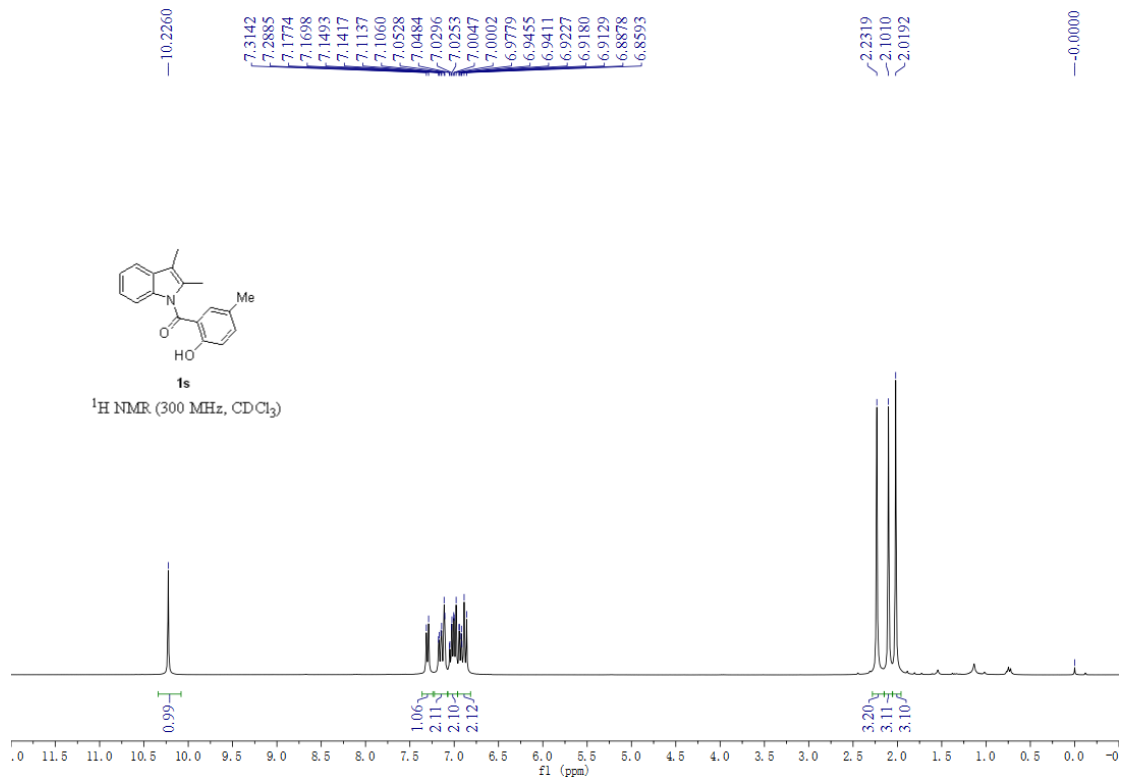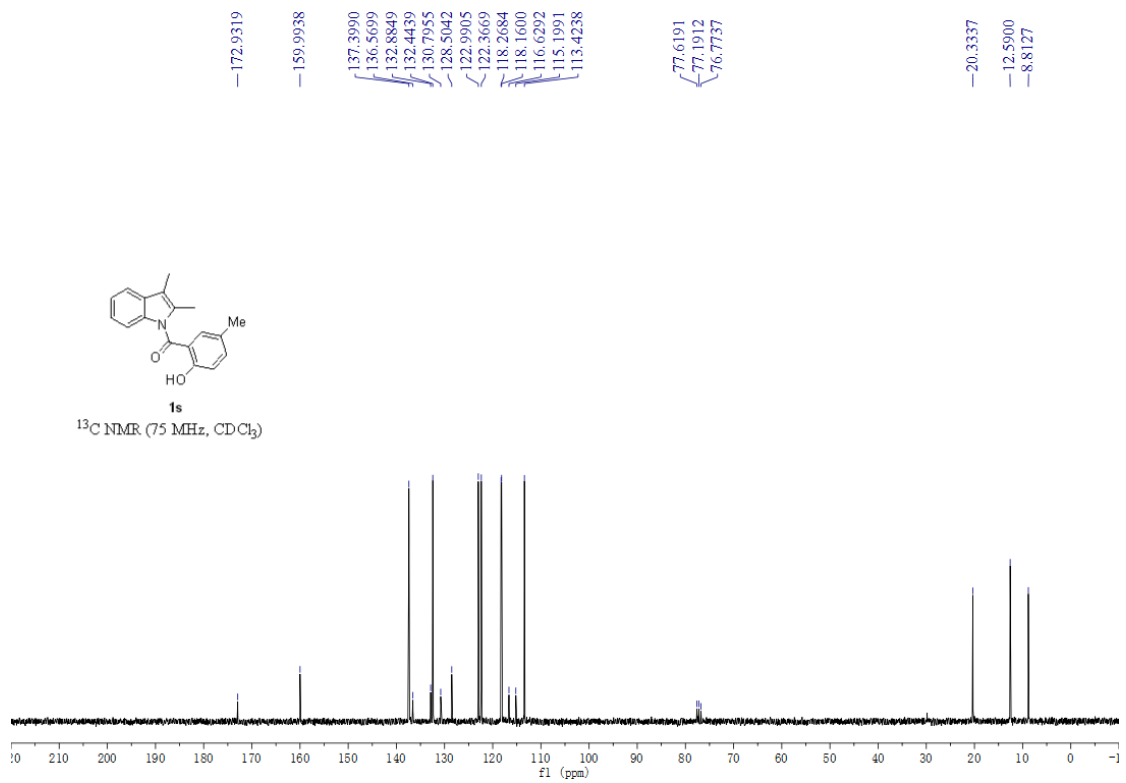

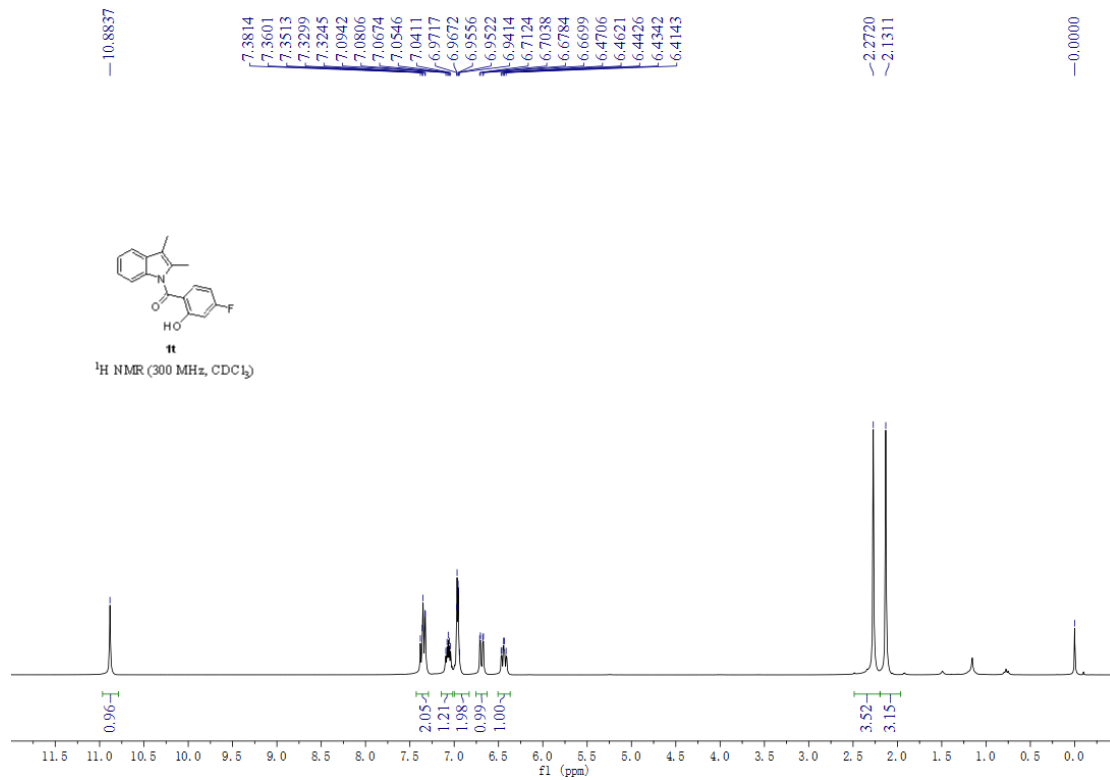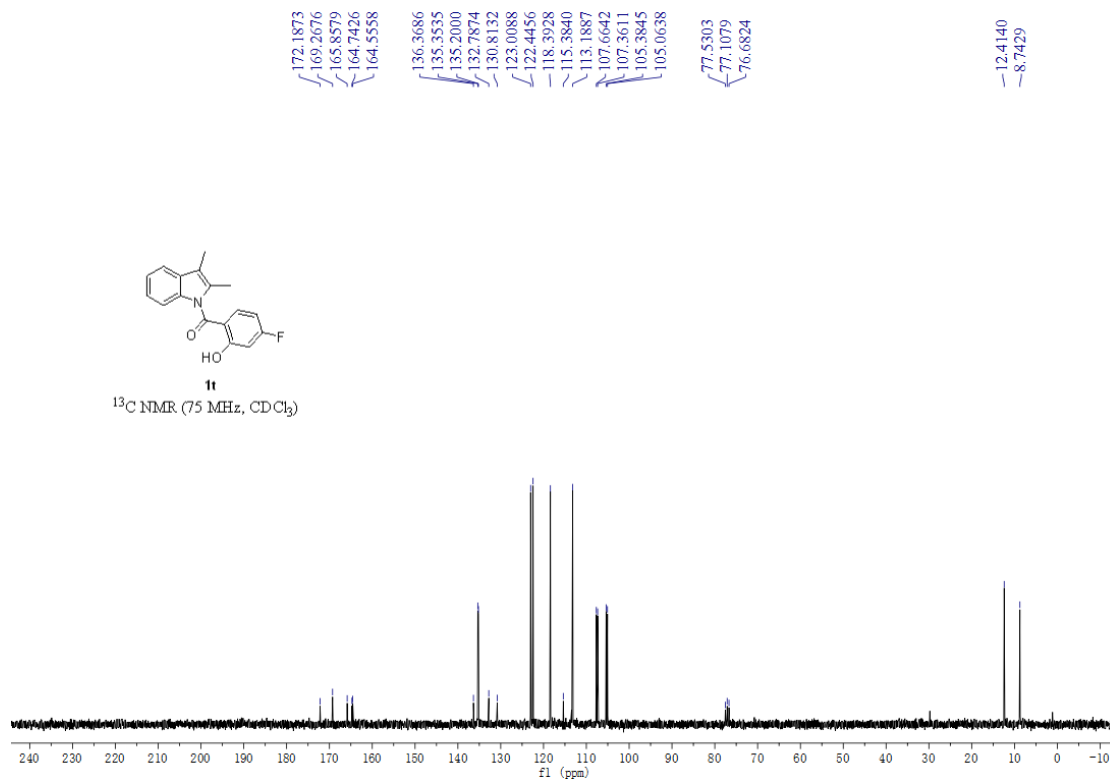

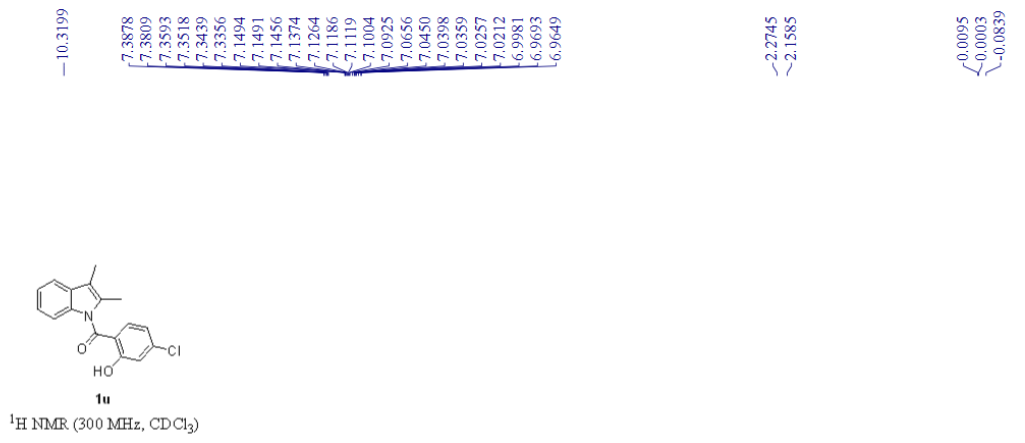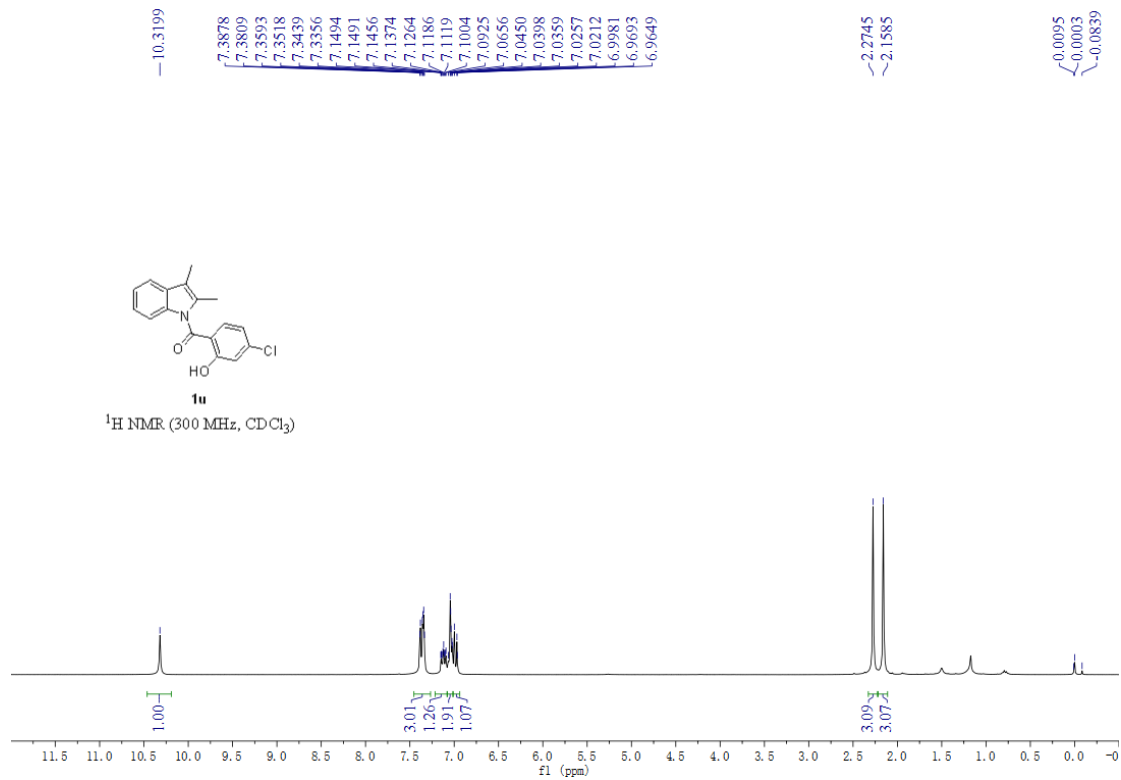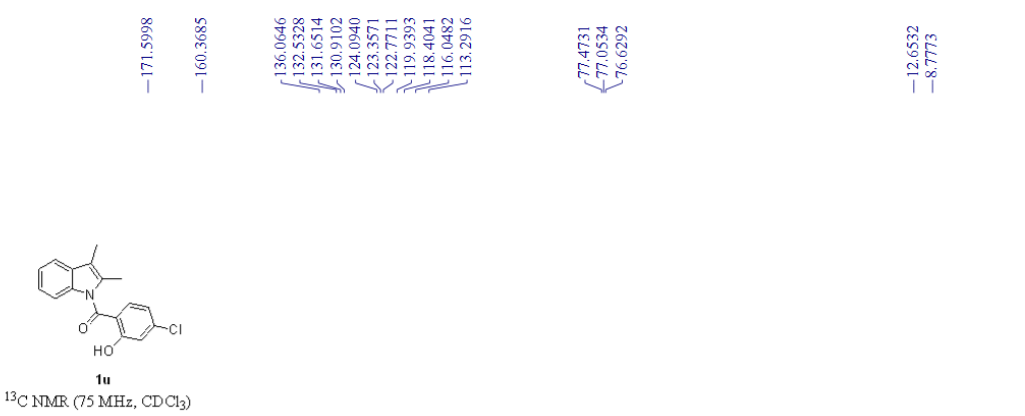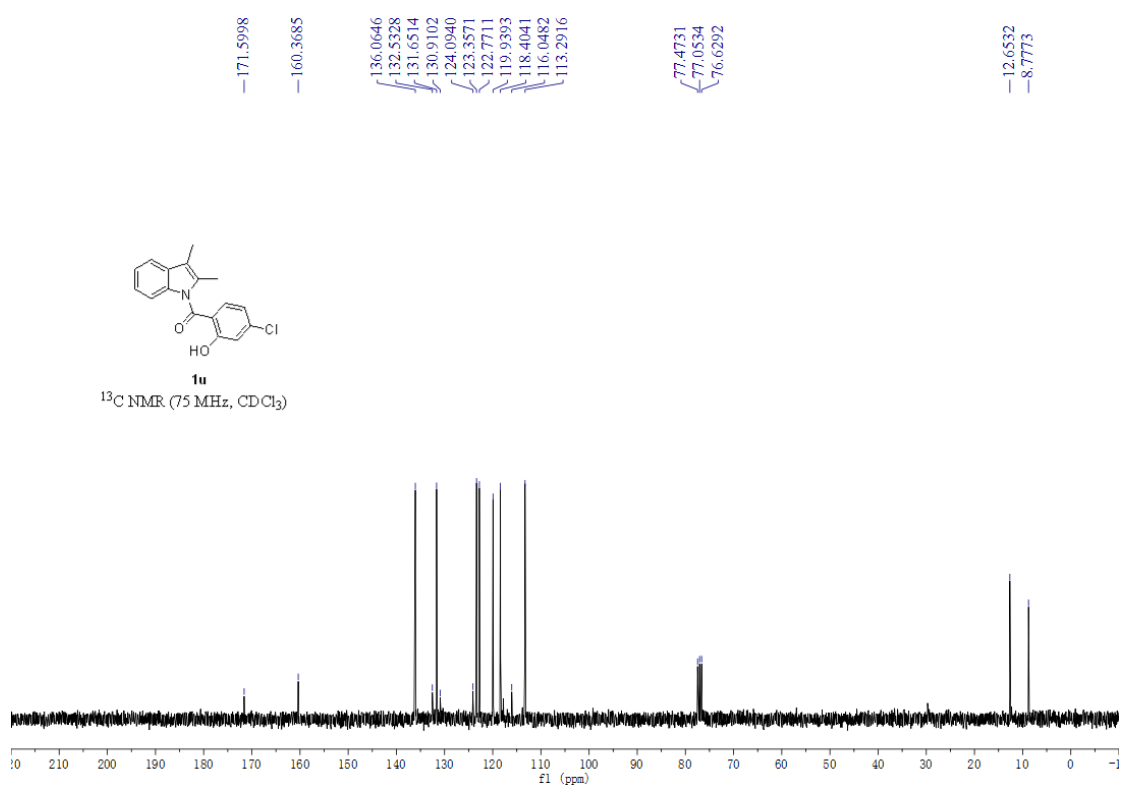

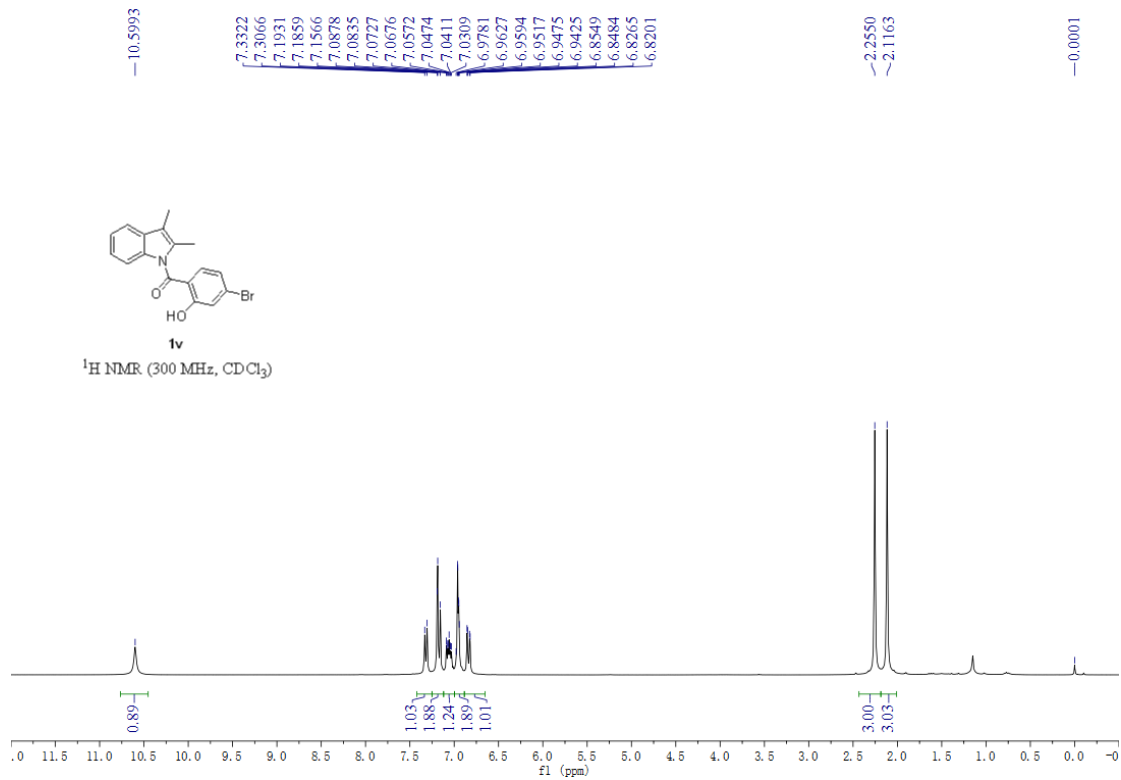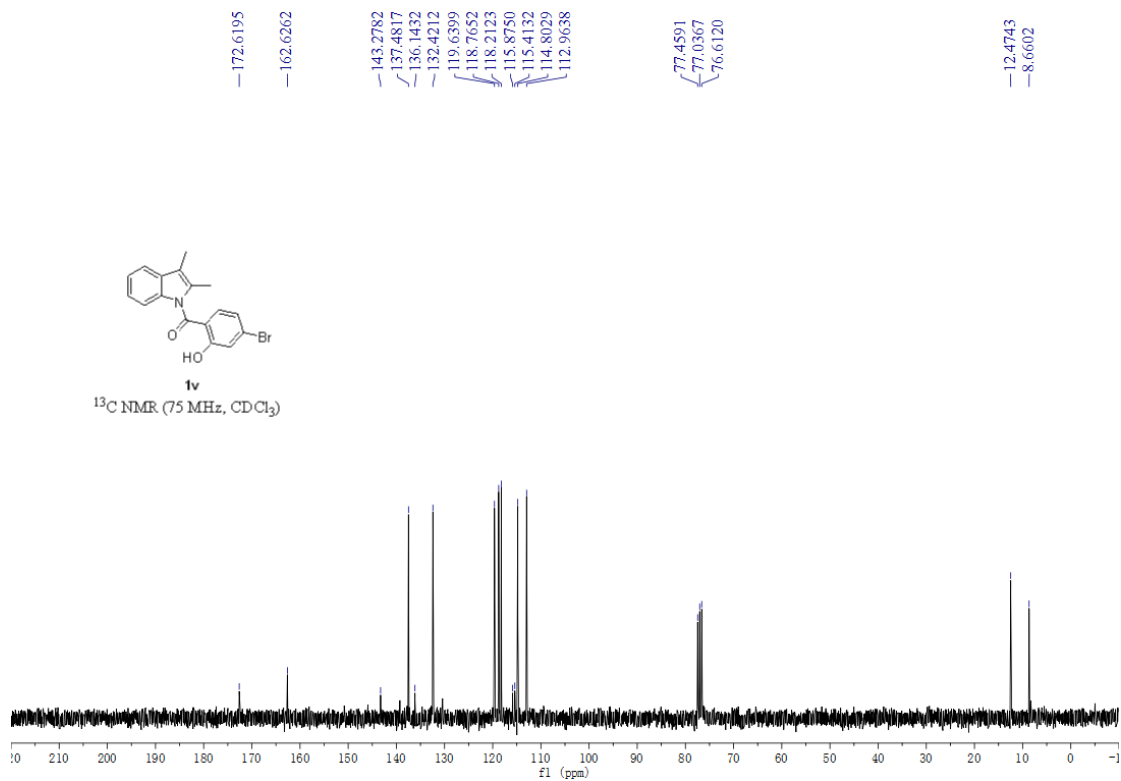

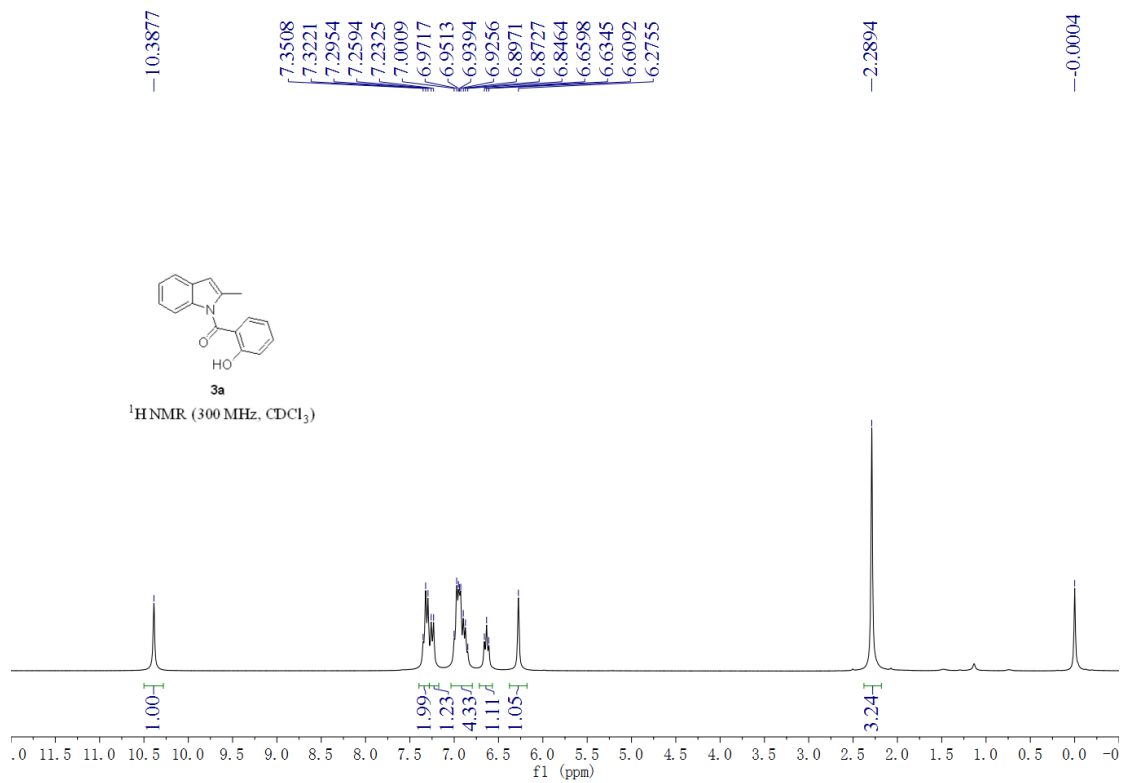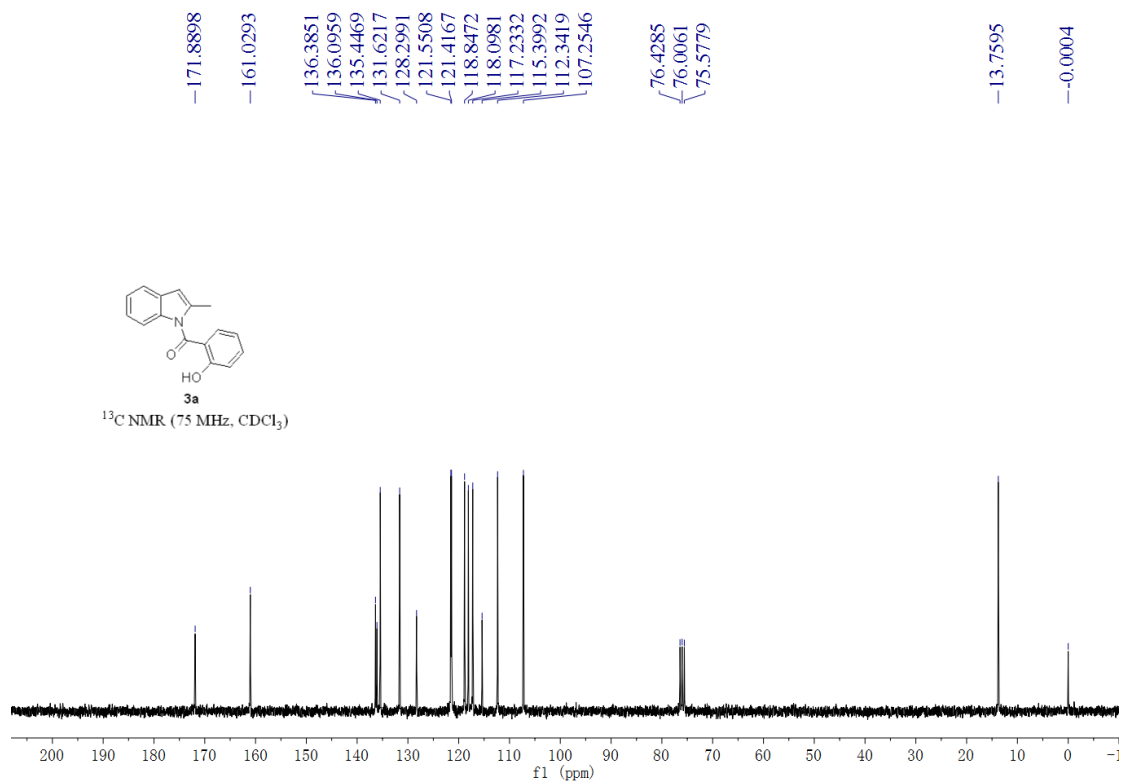



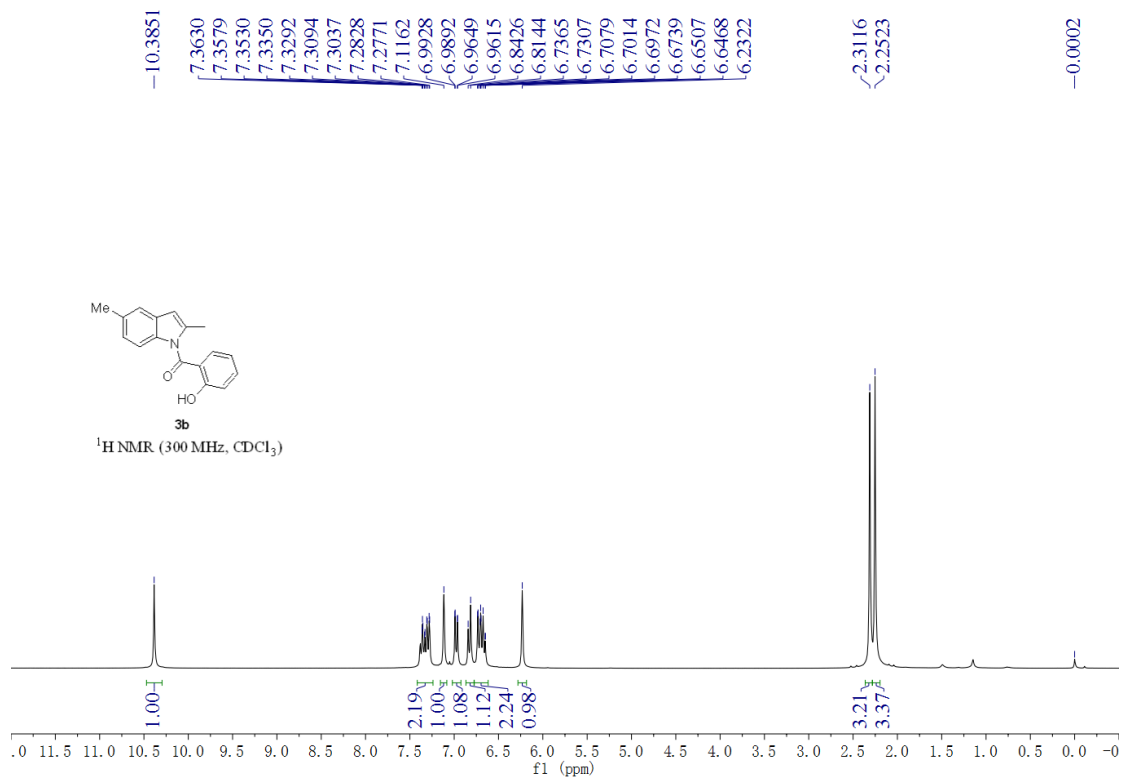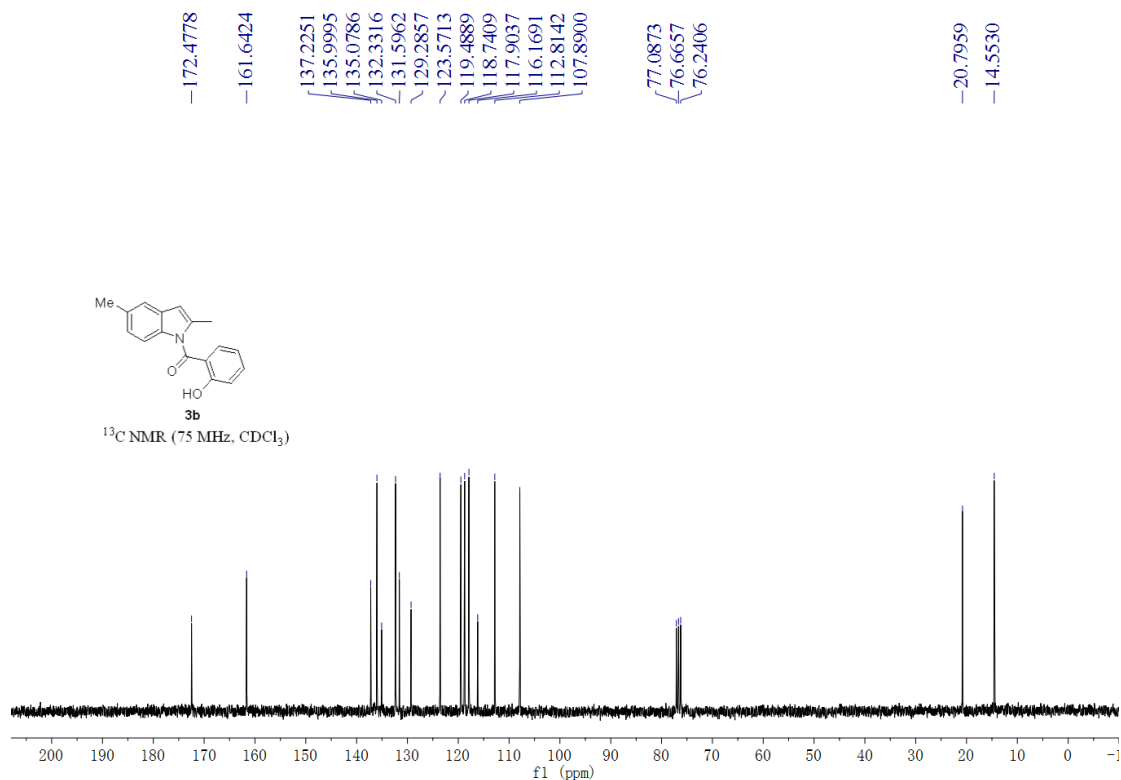

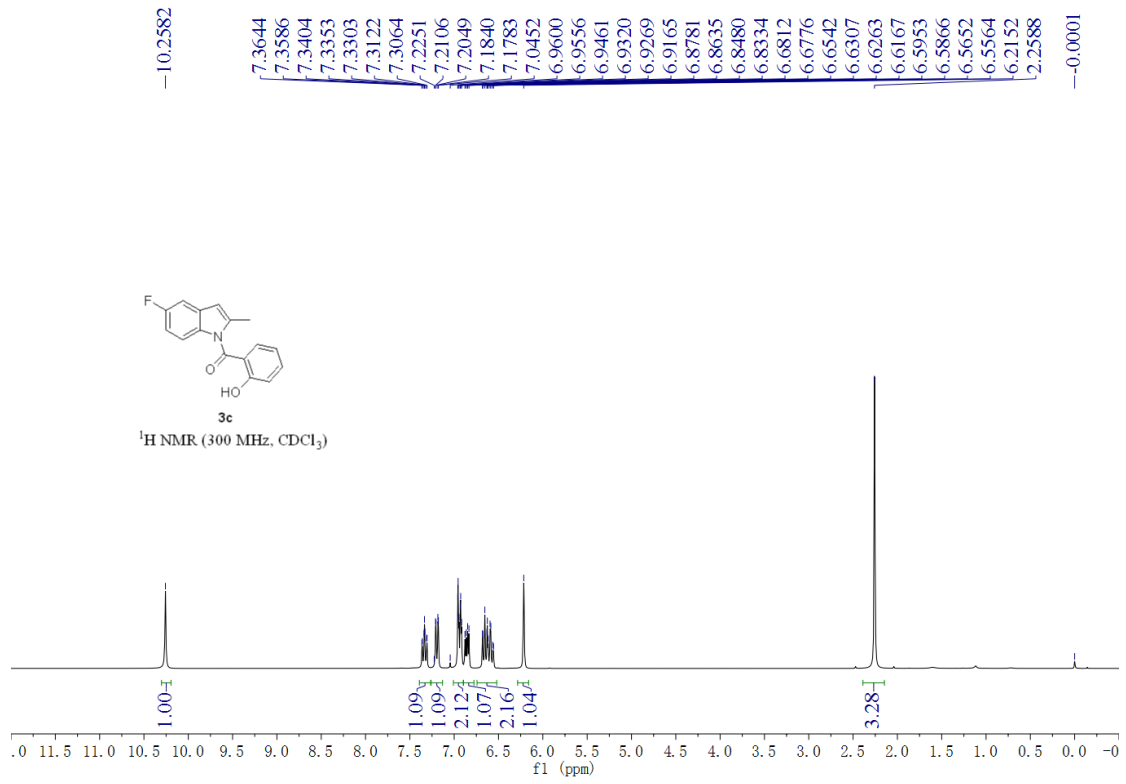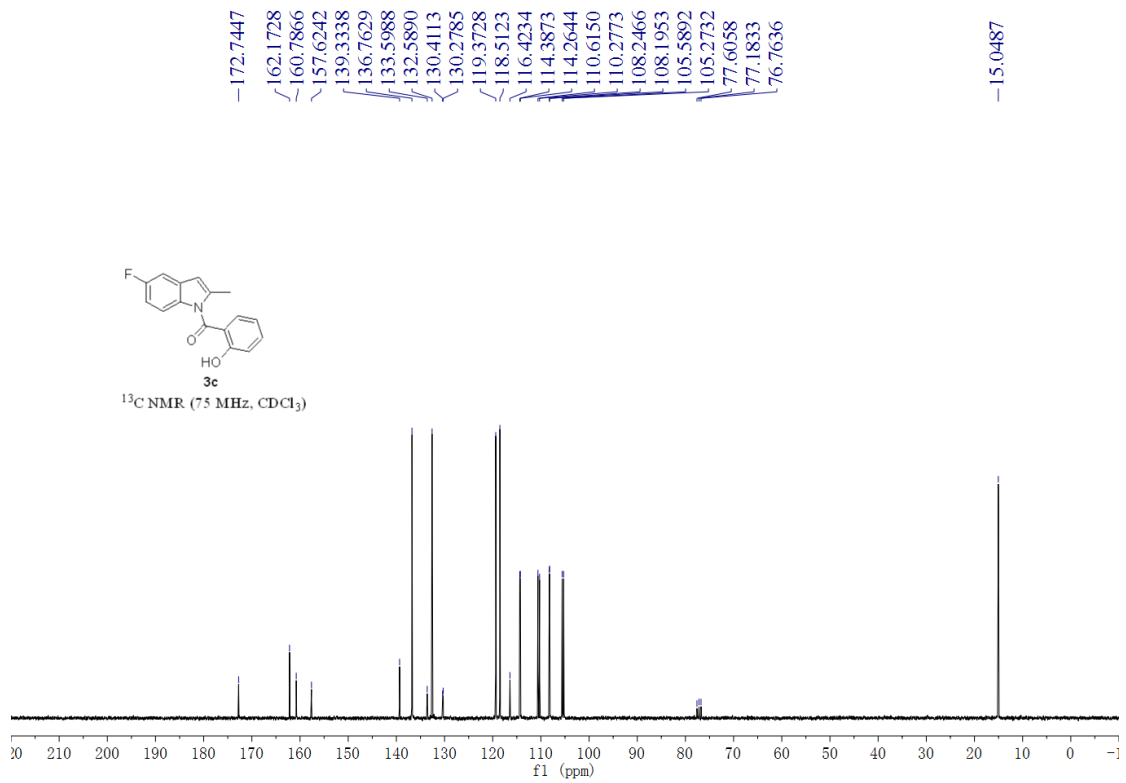

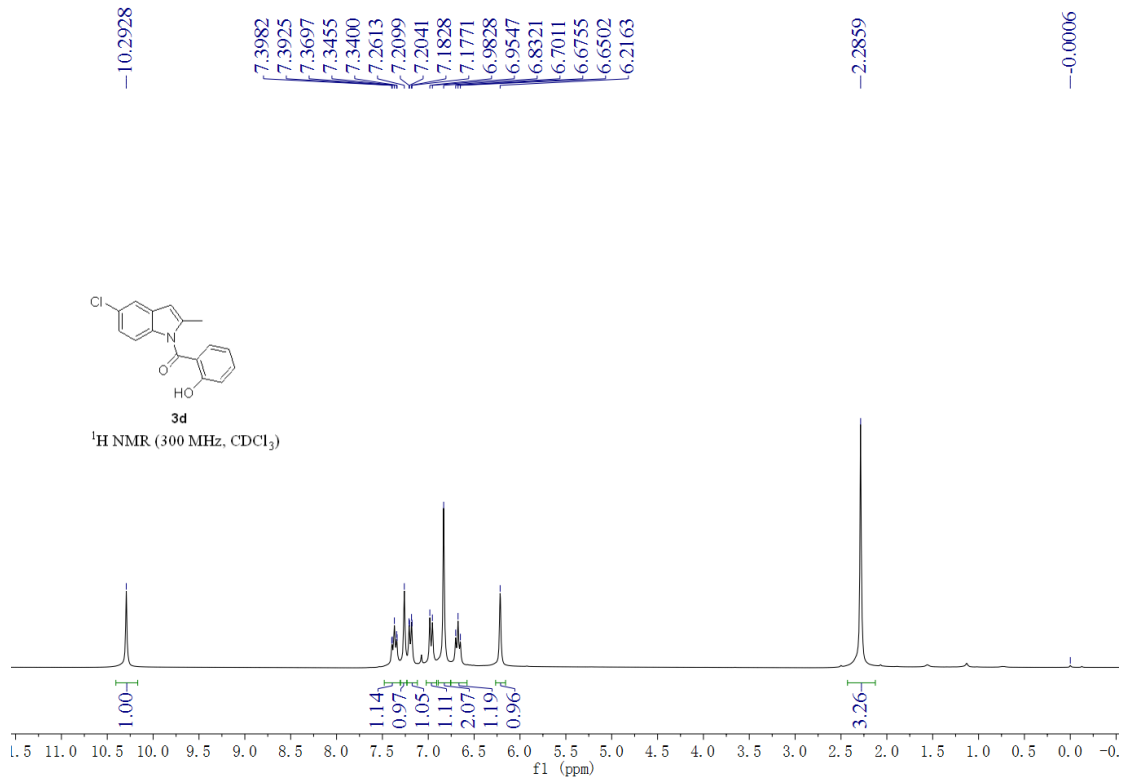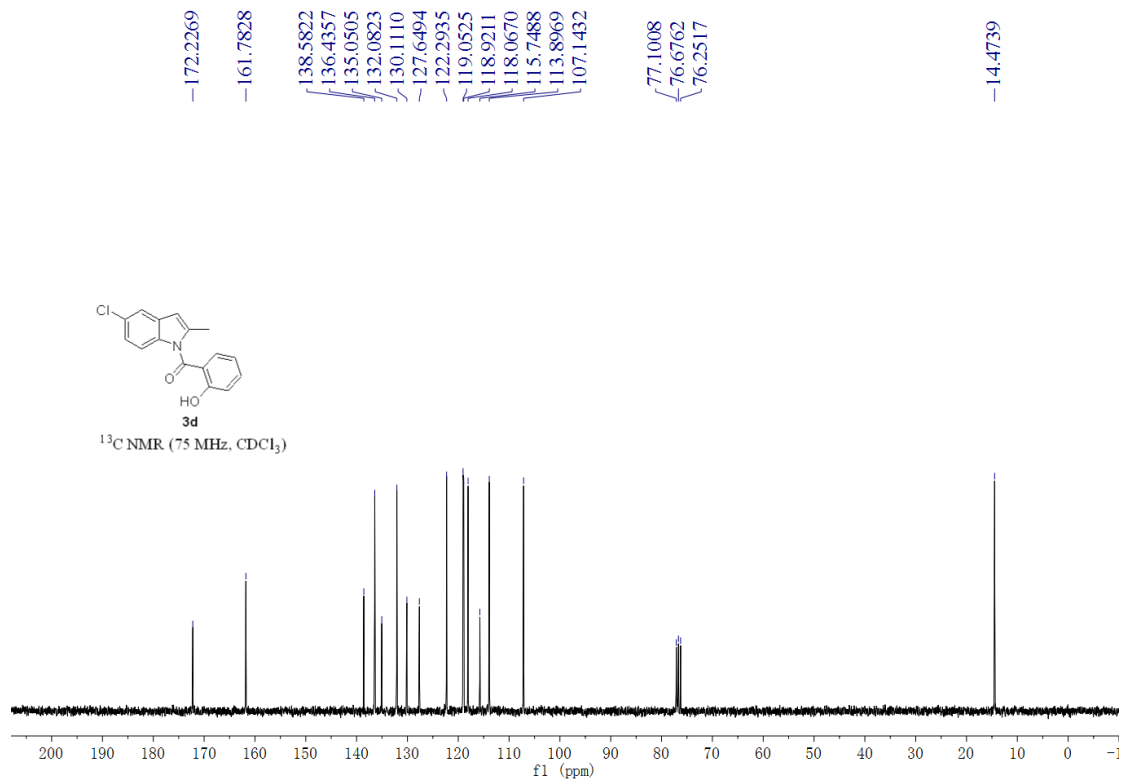

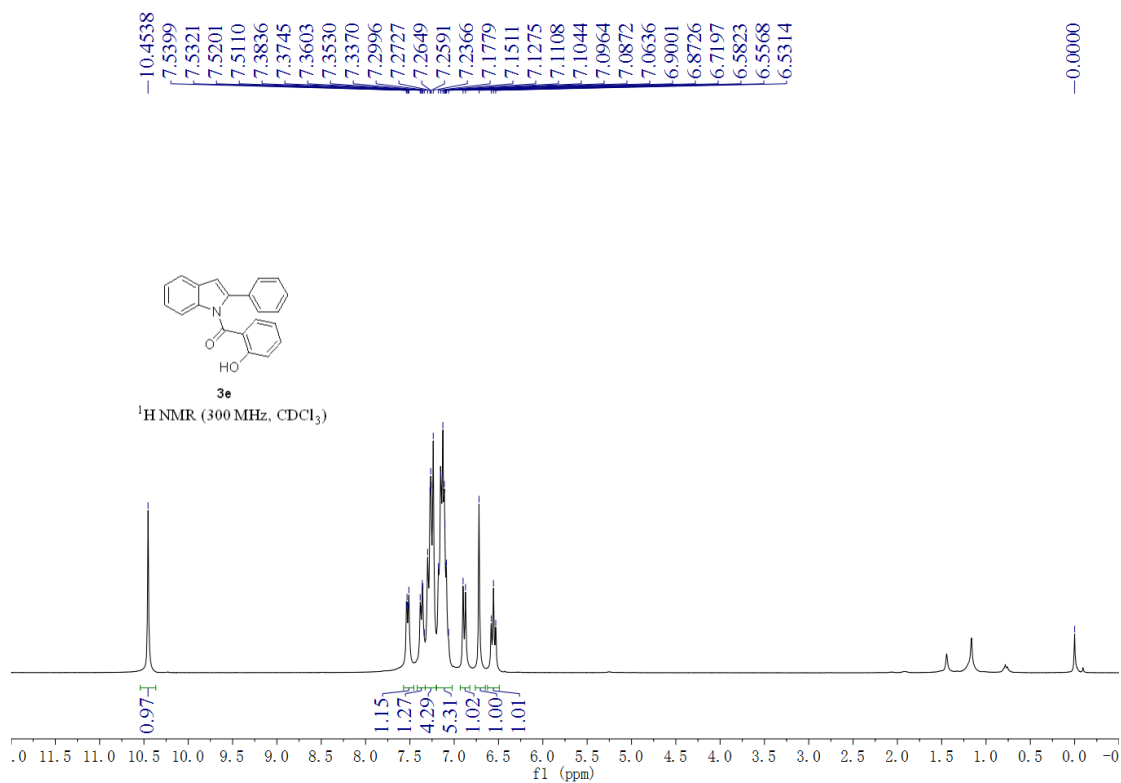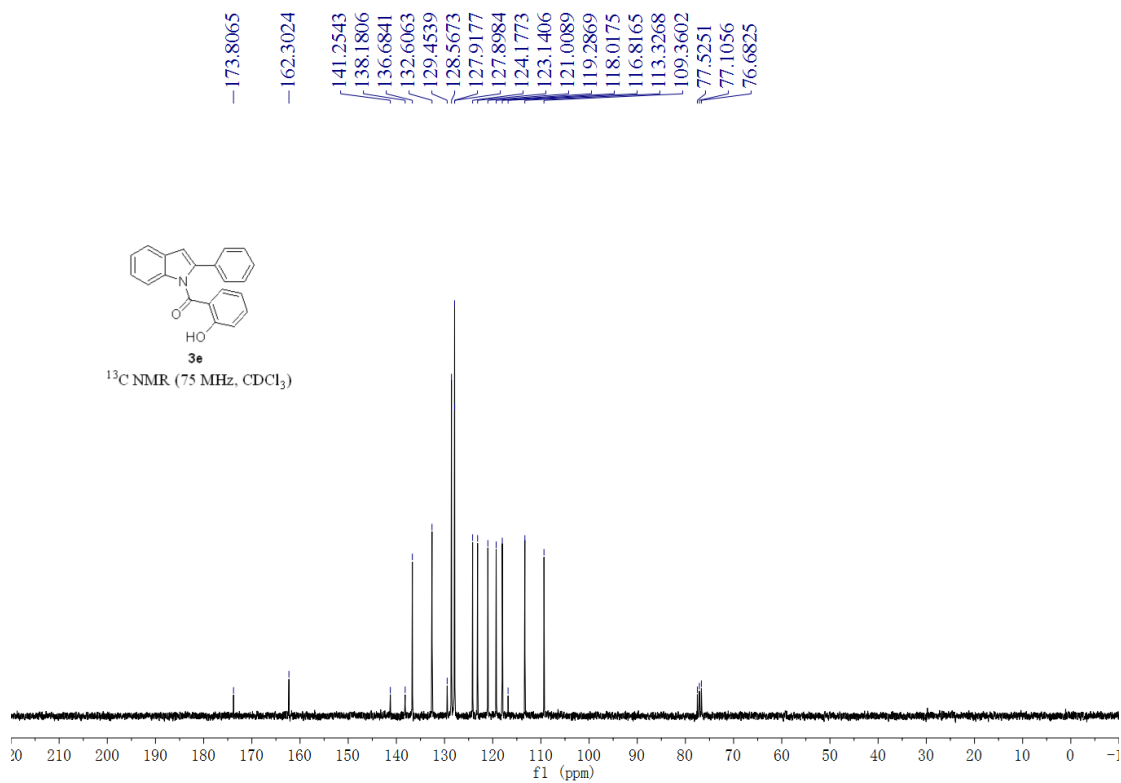

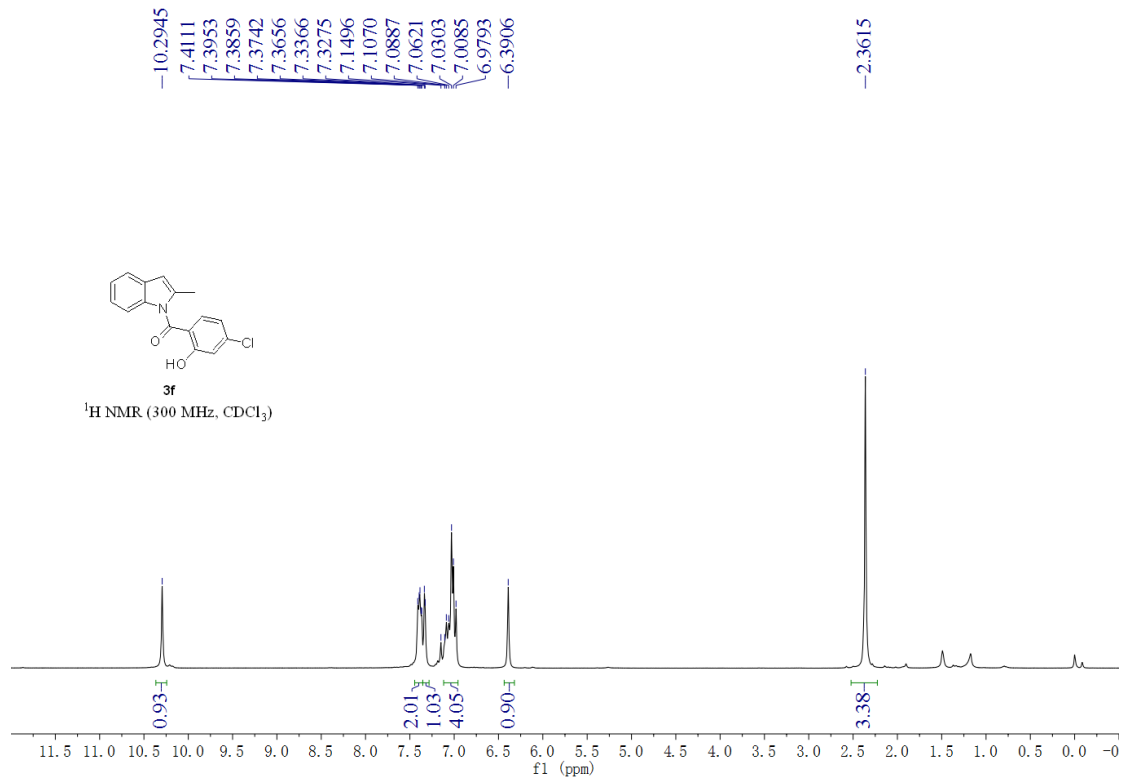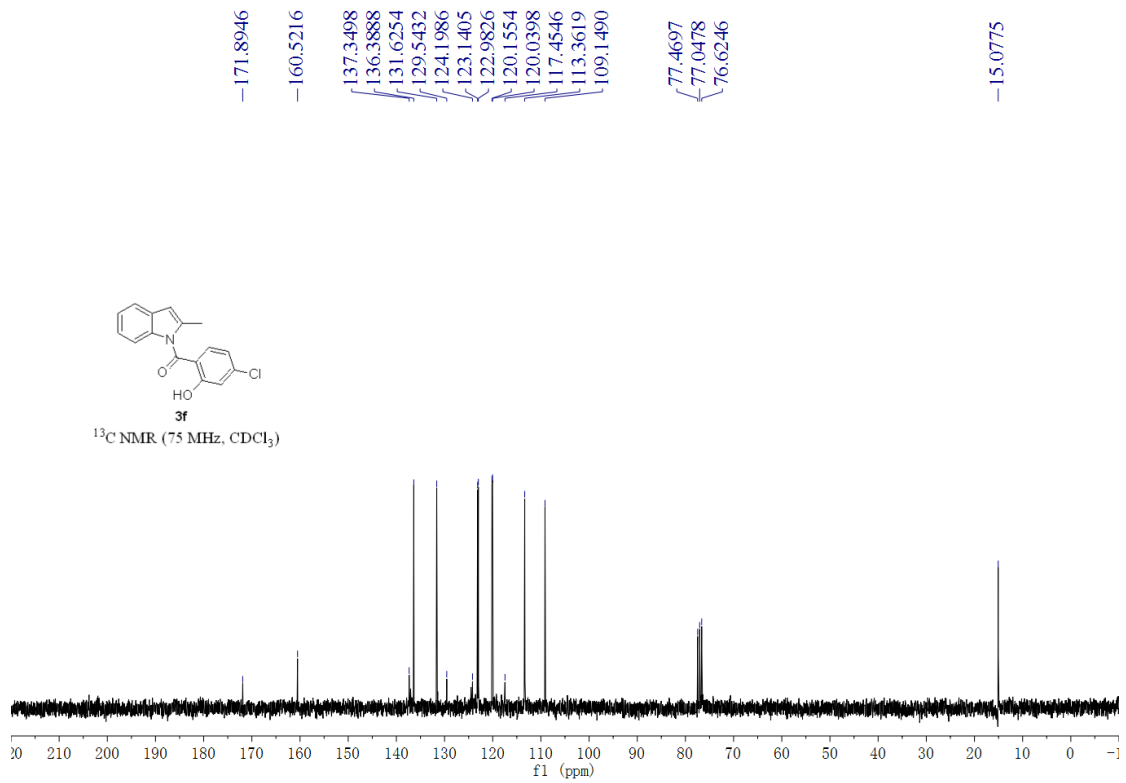

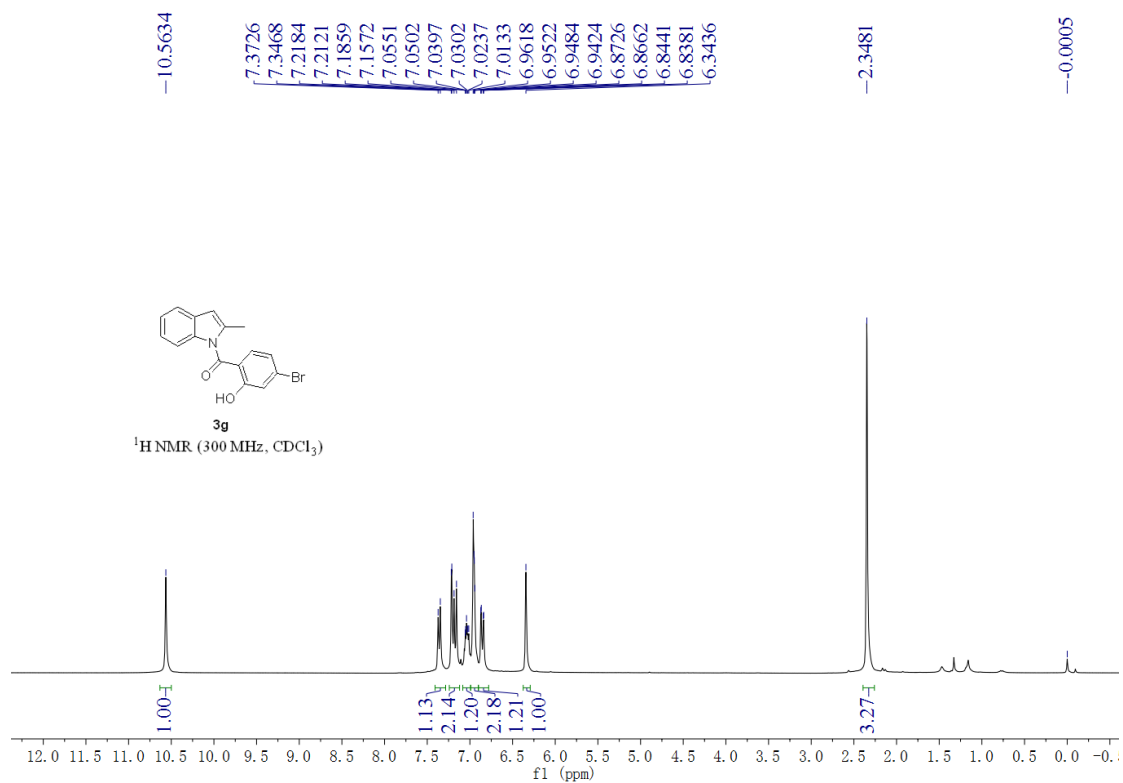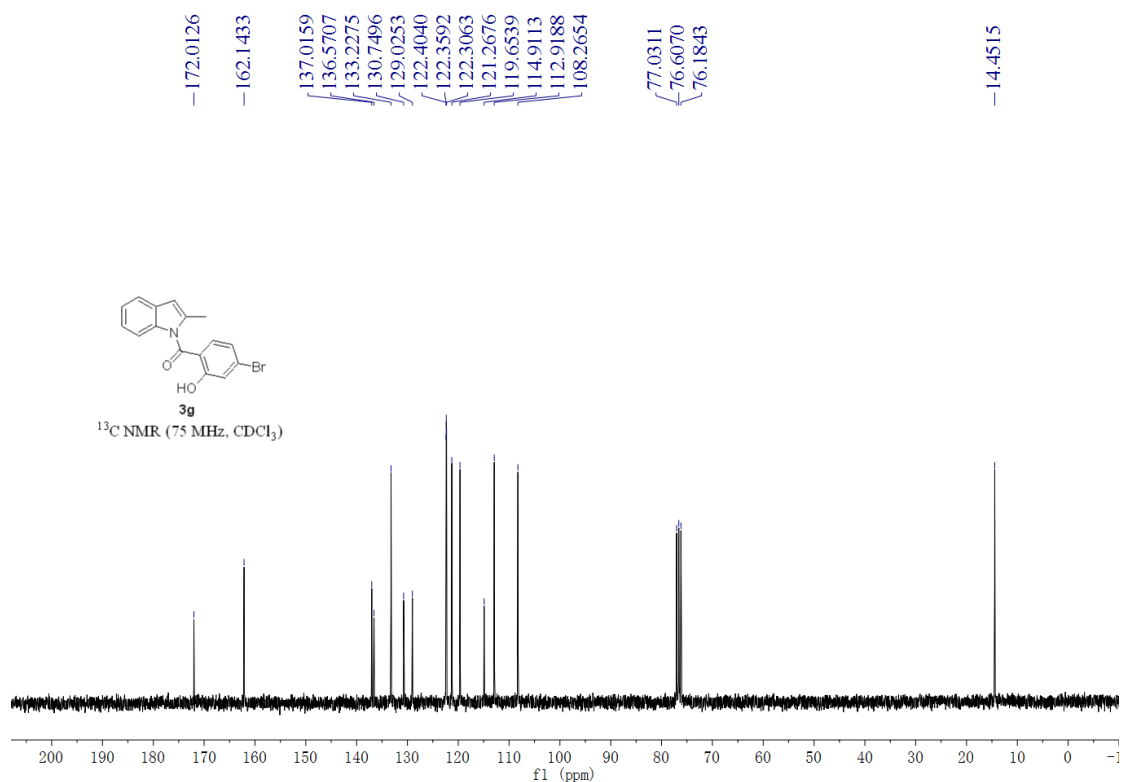

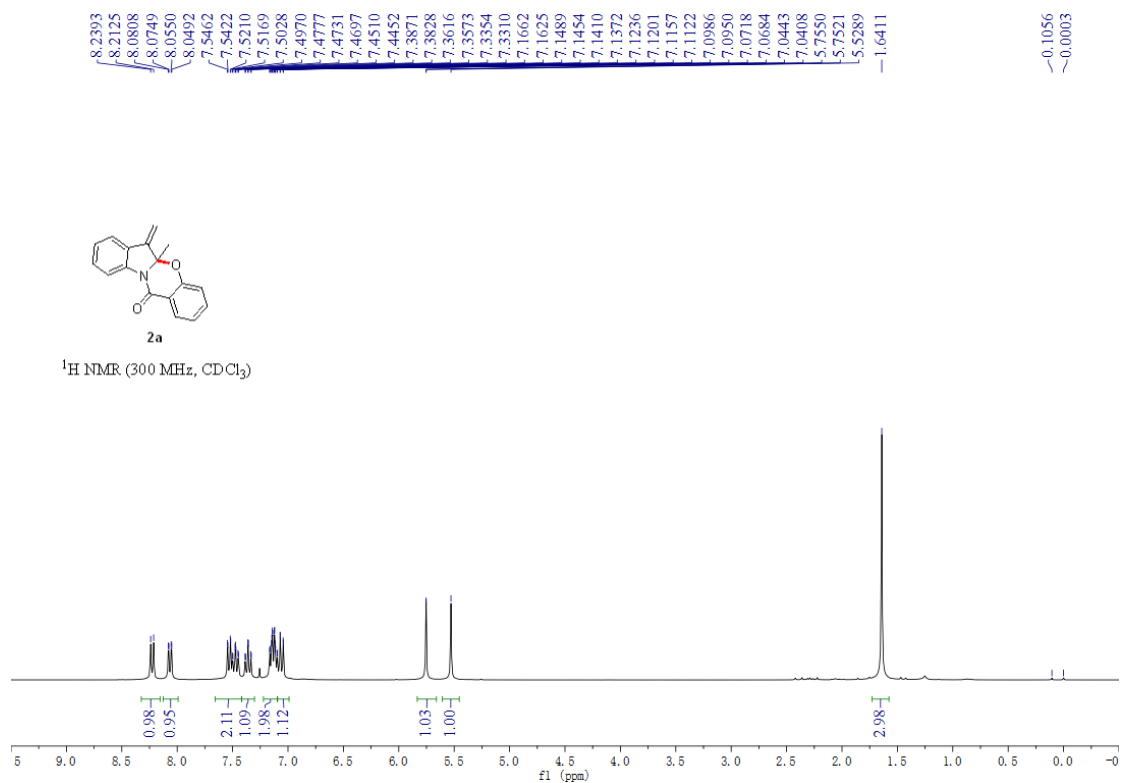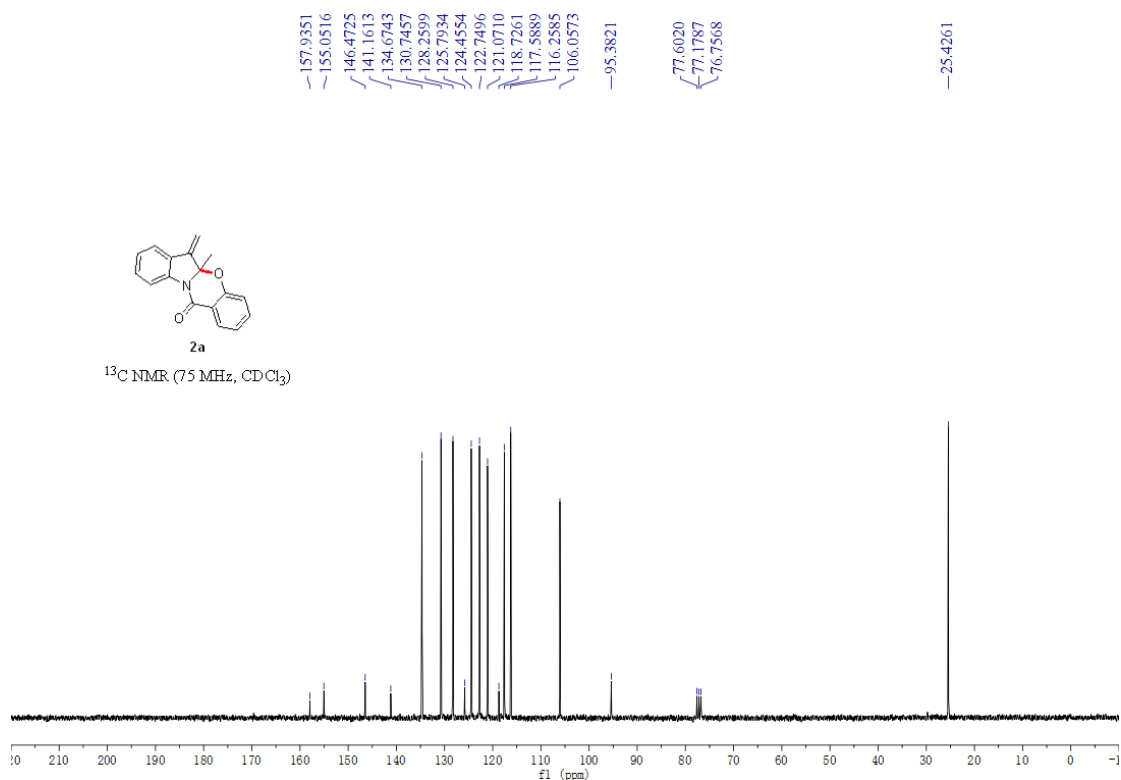

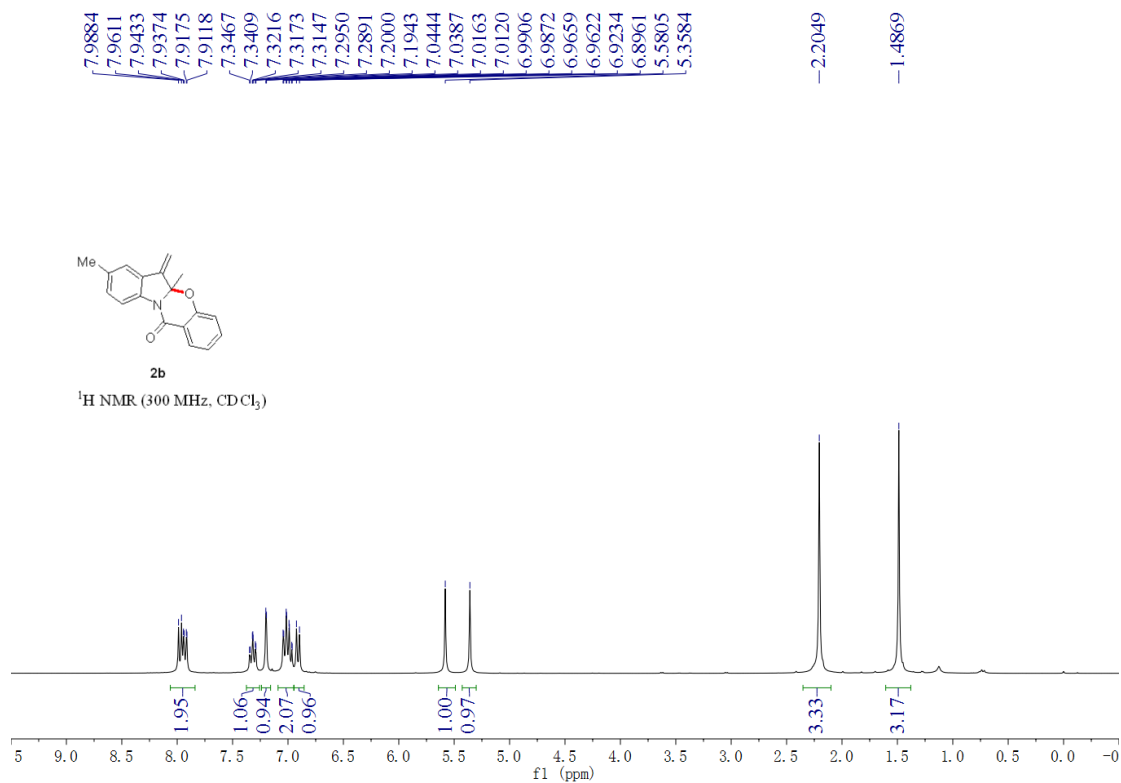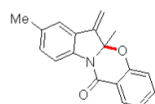

2b

<sup>1</sup>H NMR (300 MHz, CDCl<sub>3</sub>)

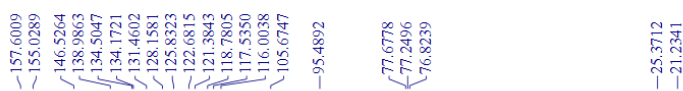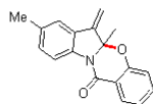

2b

<sup>13</sup>C NMR (75 MHz, CDCl<sub>3</sub>)



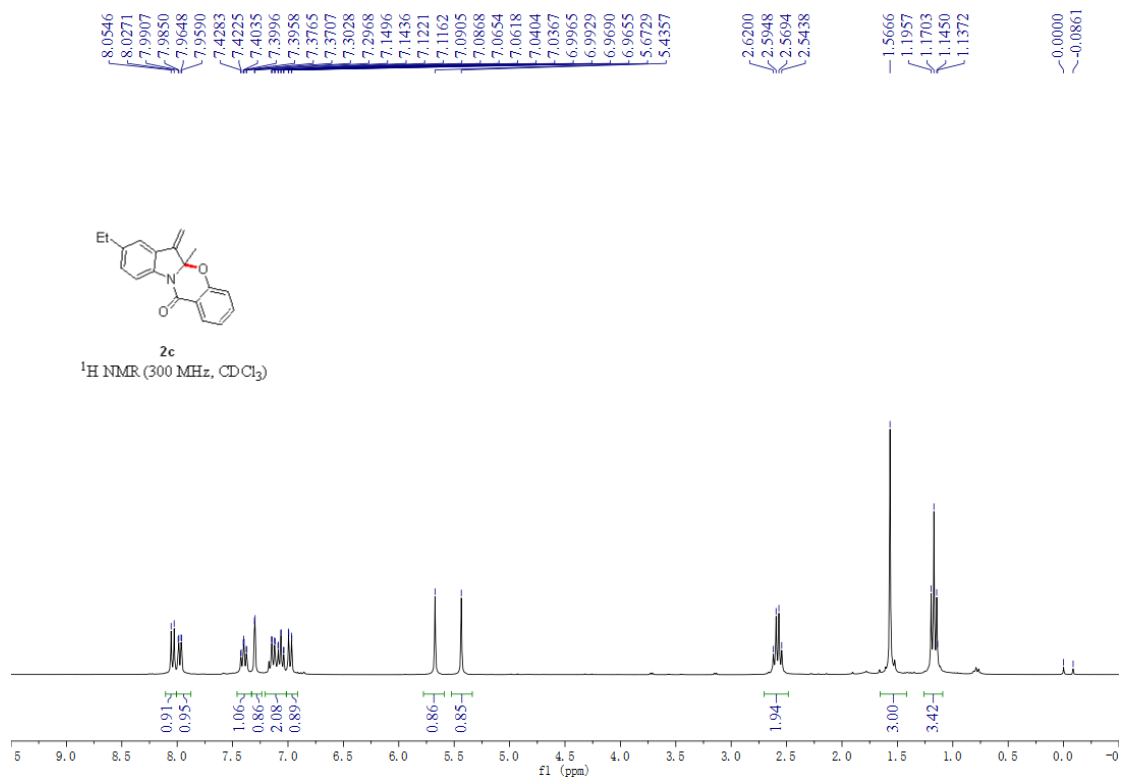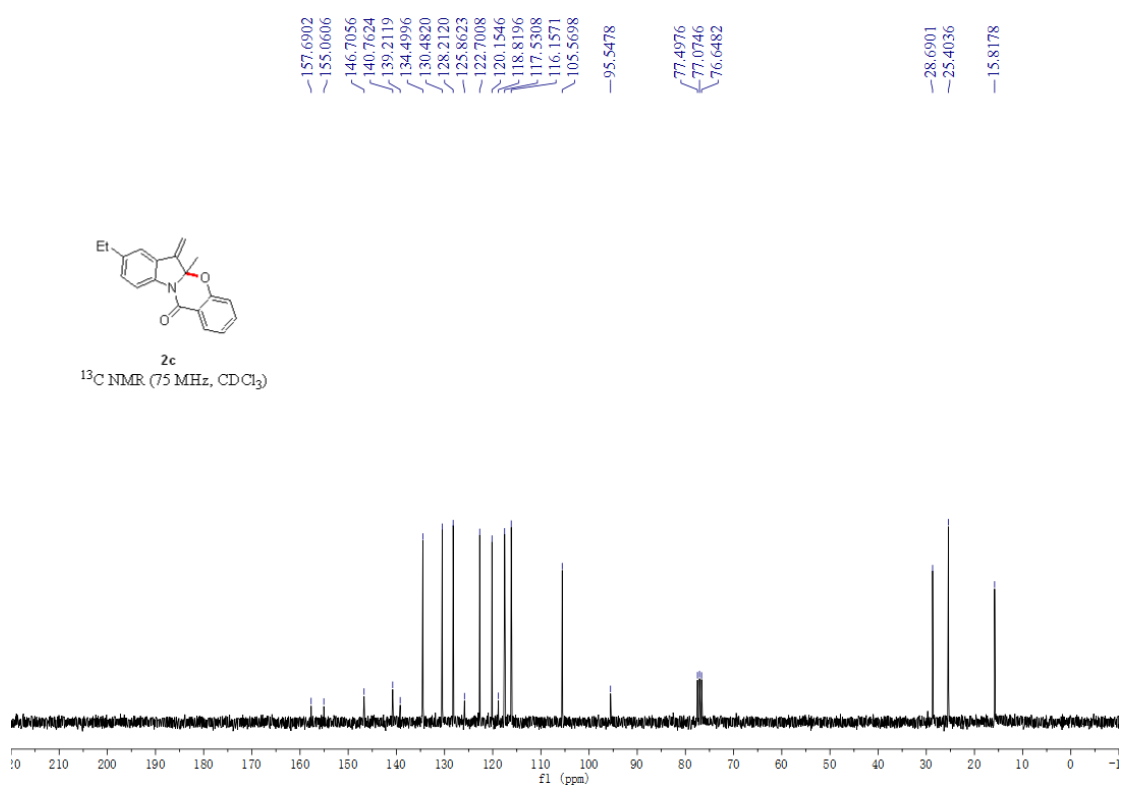

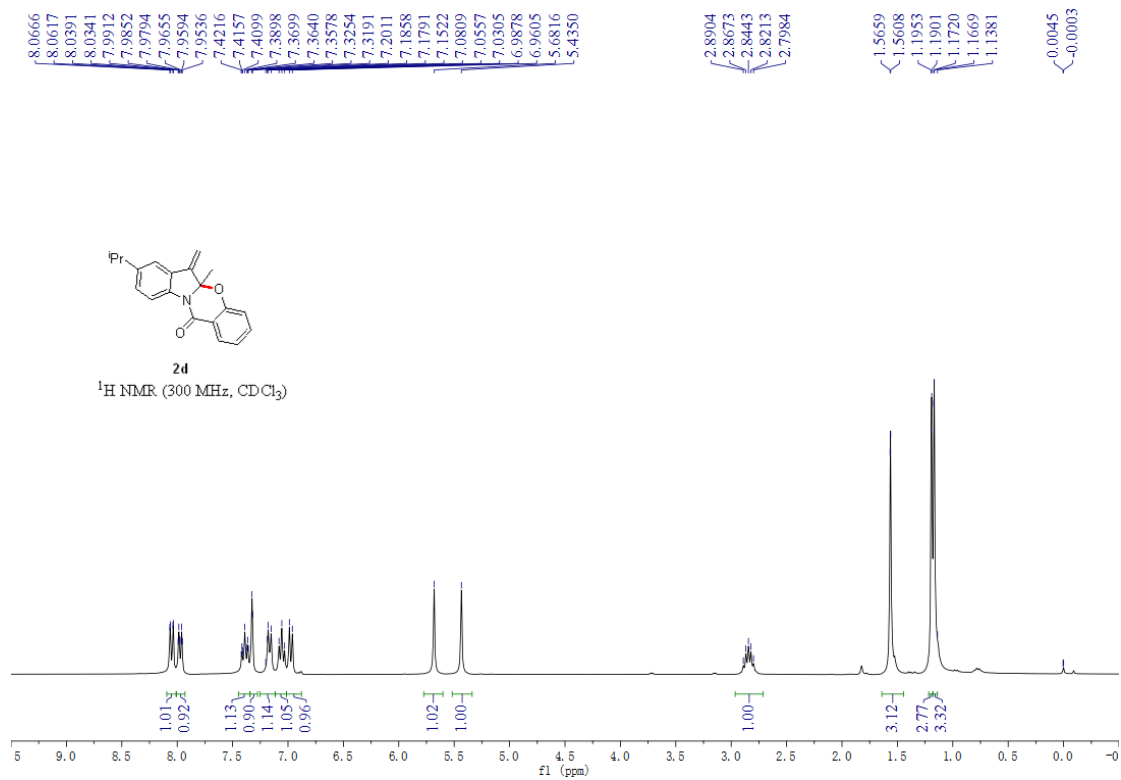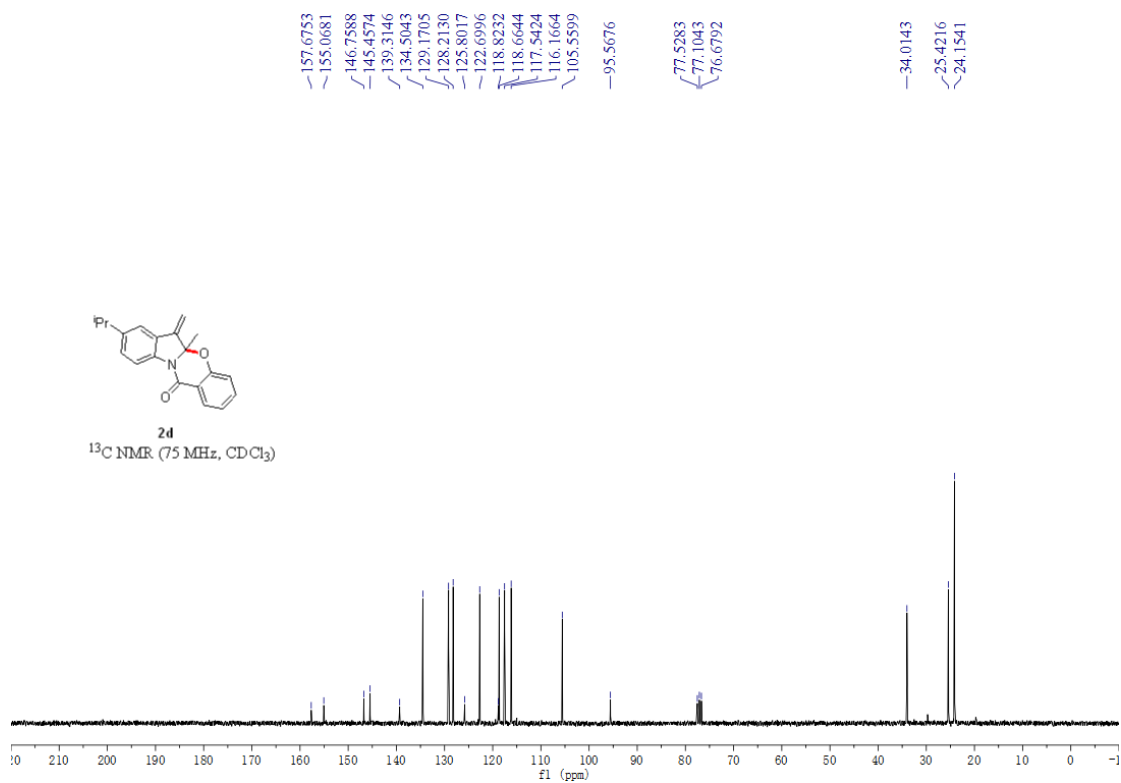

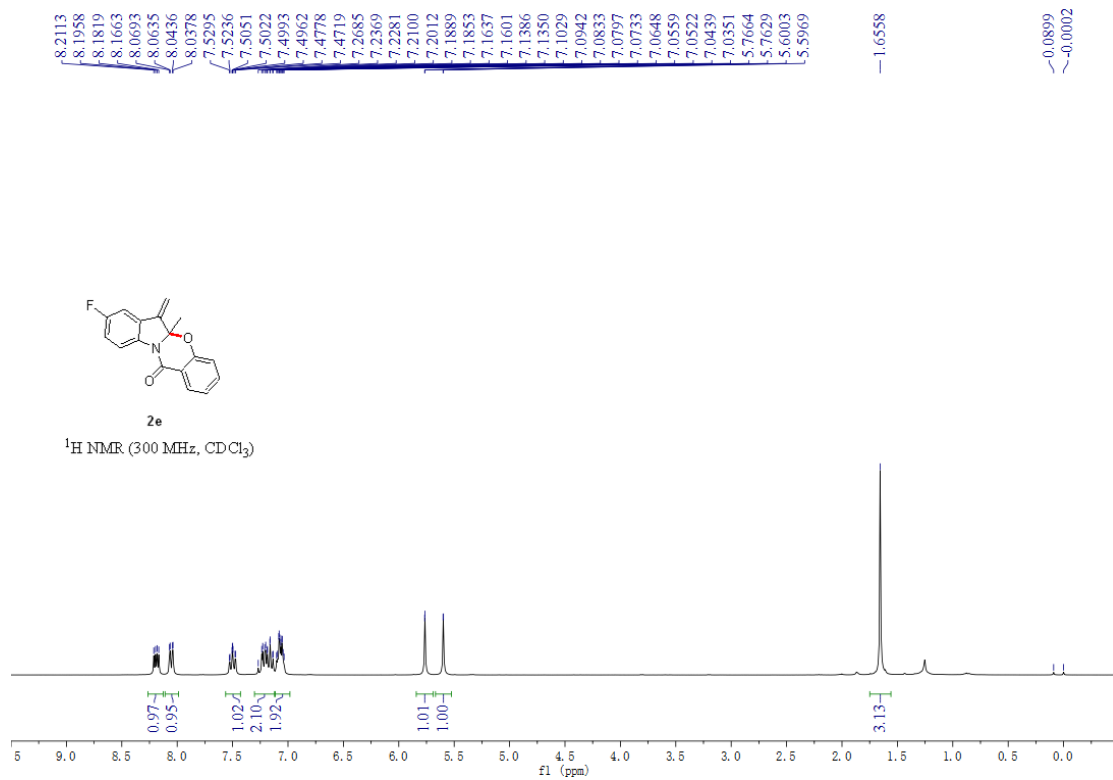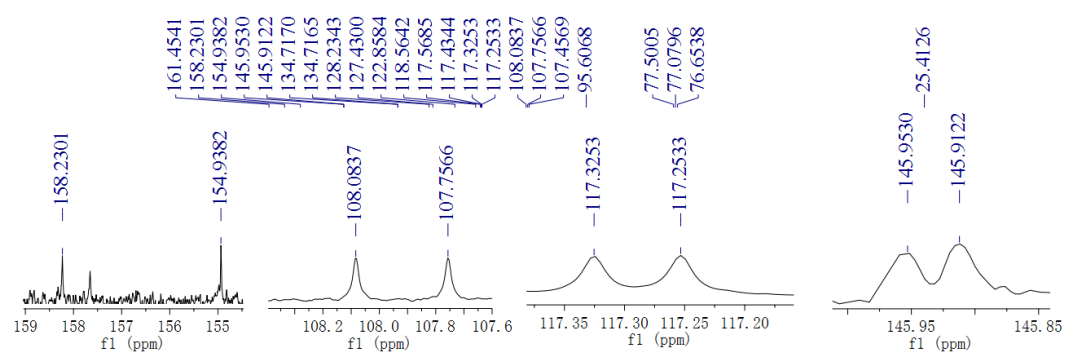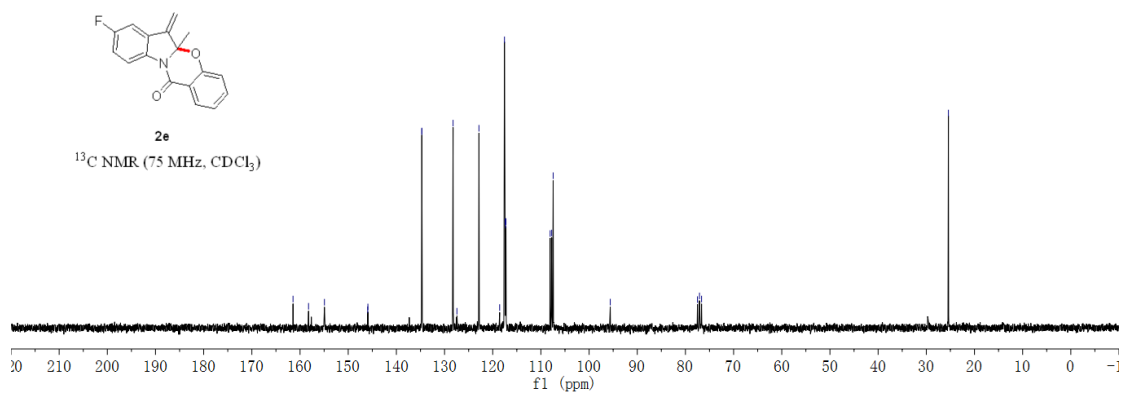

8.0749  
8.0463  
7.9733  
7.9675  
7.9474  
7.9416  
7.4406  
7.4348  
7.4126  
7.4056  
7.3888  
7.3828  
7.2888  
7.2416  
7.2202  
7.2130  
7.0954  
7.0919  
7.0703  
7.0667  
7.0453  
7.0417  
6.9899  
6.9863  
6.9625  
6.9591  
5.6838  
5.6804  
5.5005  
5.4970

1.5583

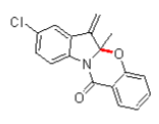

**2f**

<sup>1</sup>H NMR (300 MHz, CDCl<sub>3</sub>)

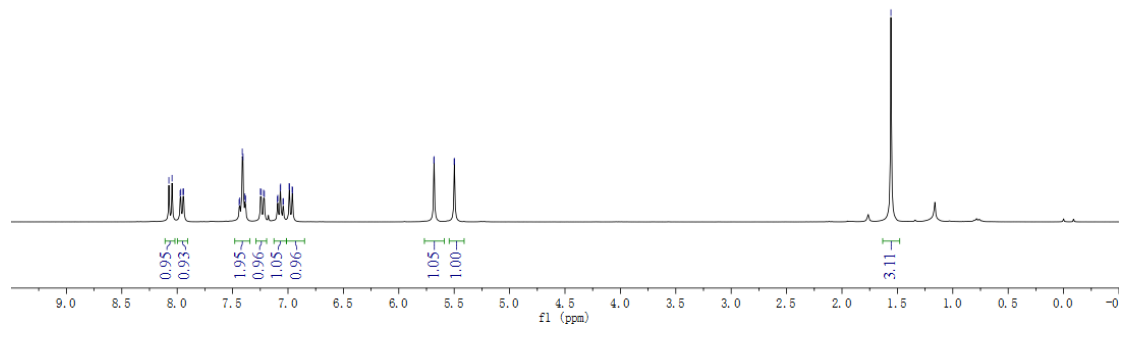

157.8244  
154.9896  
145.4876  
139.6155  
134.8479  
130.5552  
129.6840  
128.2857  
127.4335  
122.8918  
121.1537  
118.4688  
117.6165  
117.2516  
107.5254  
95.5559  
77.5149  
77.0885  
76.6699  
25.4368

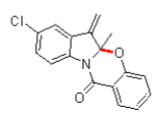

**2f**

<sup>13</sup>C NMR (75 MHz, CDCl<sub>3</sub>)

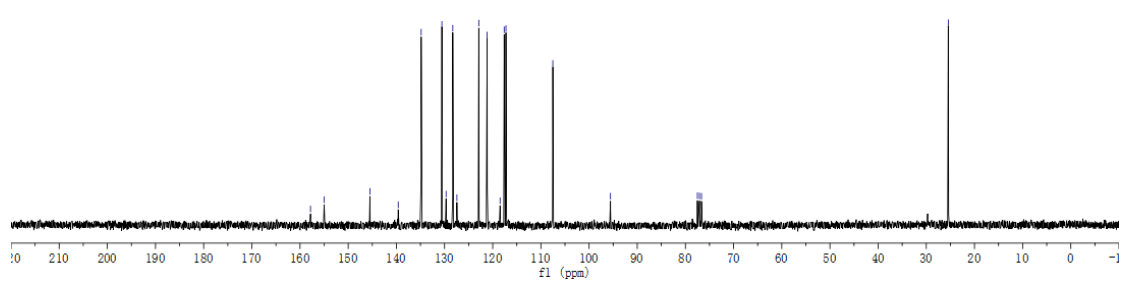

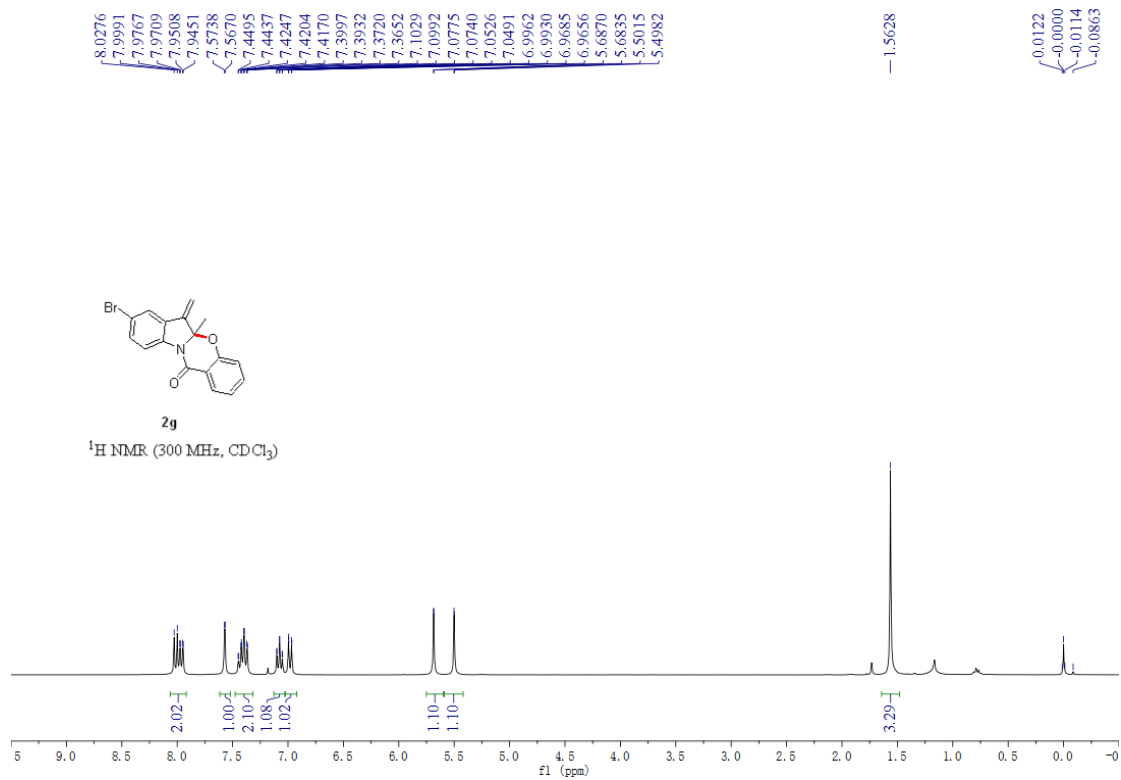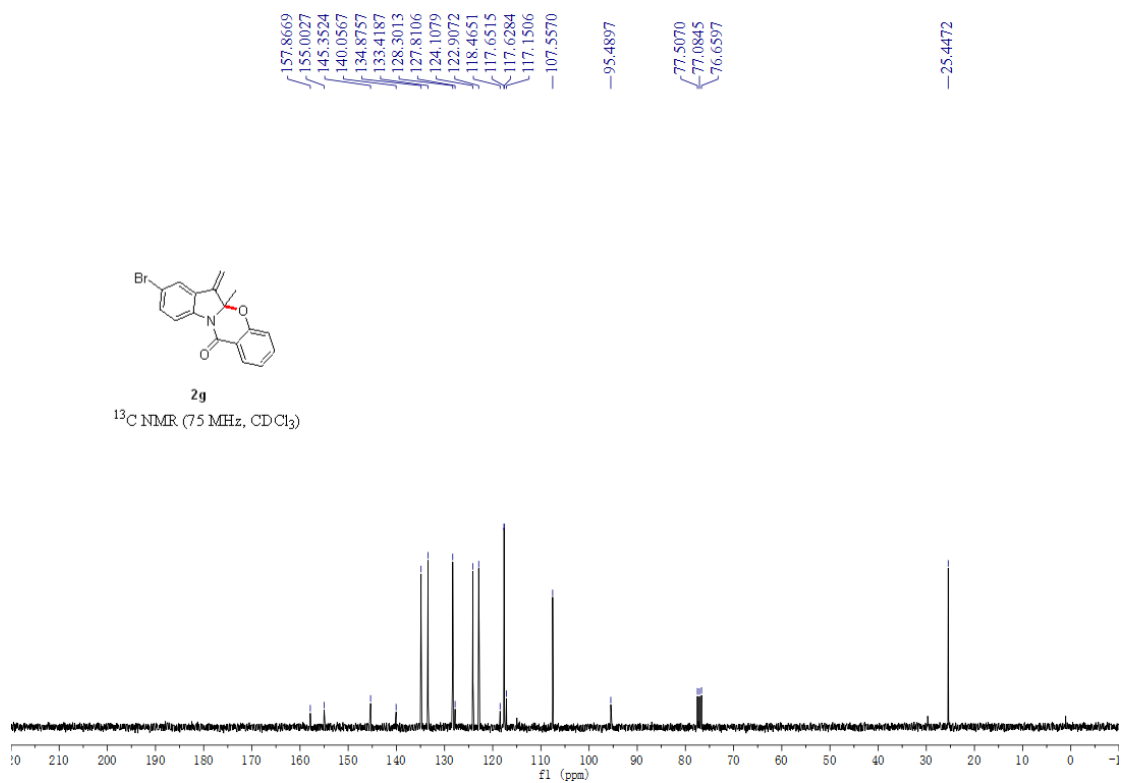

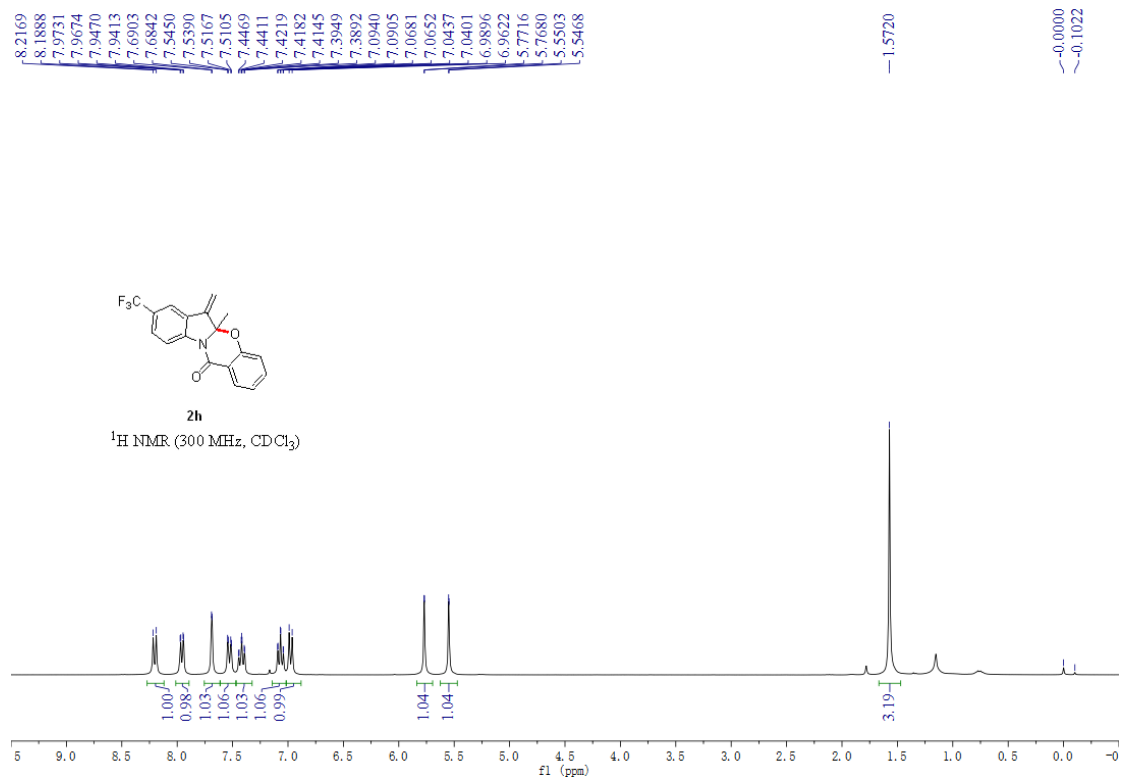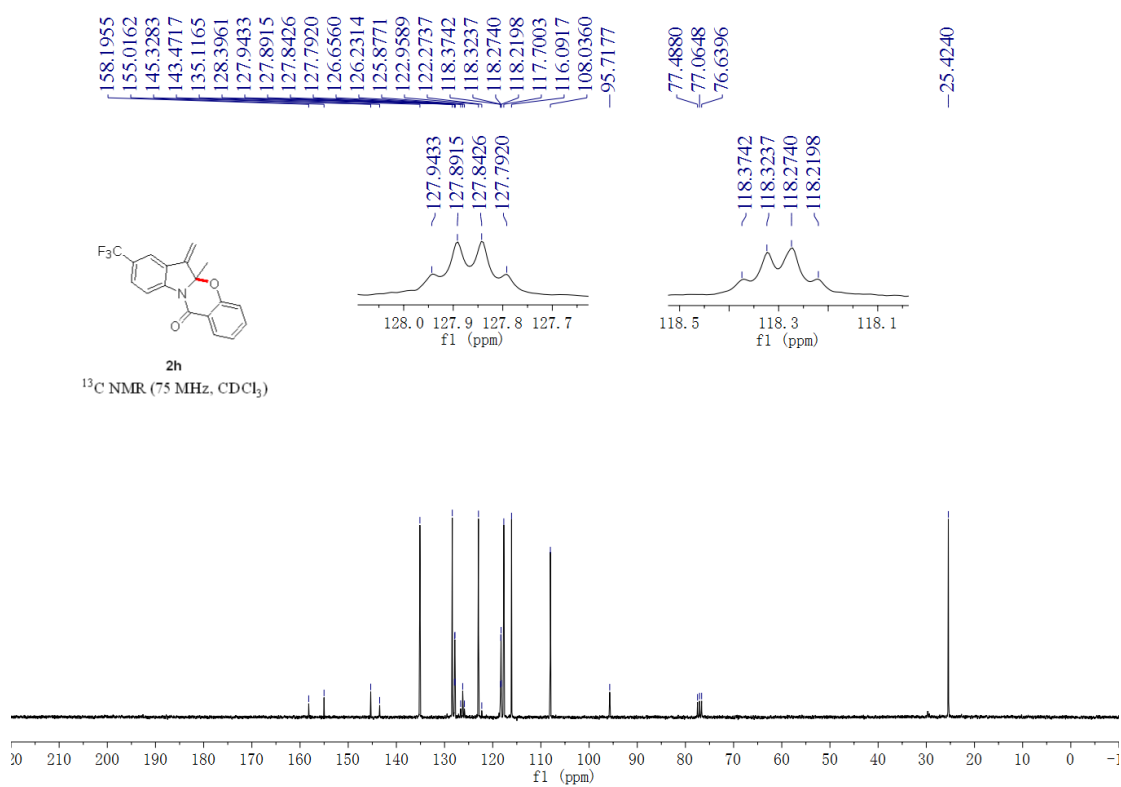

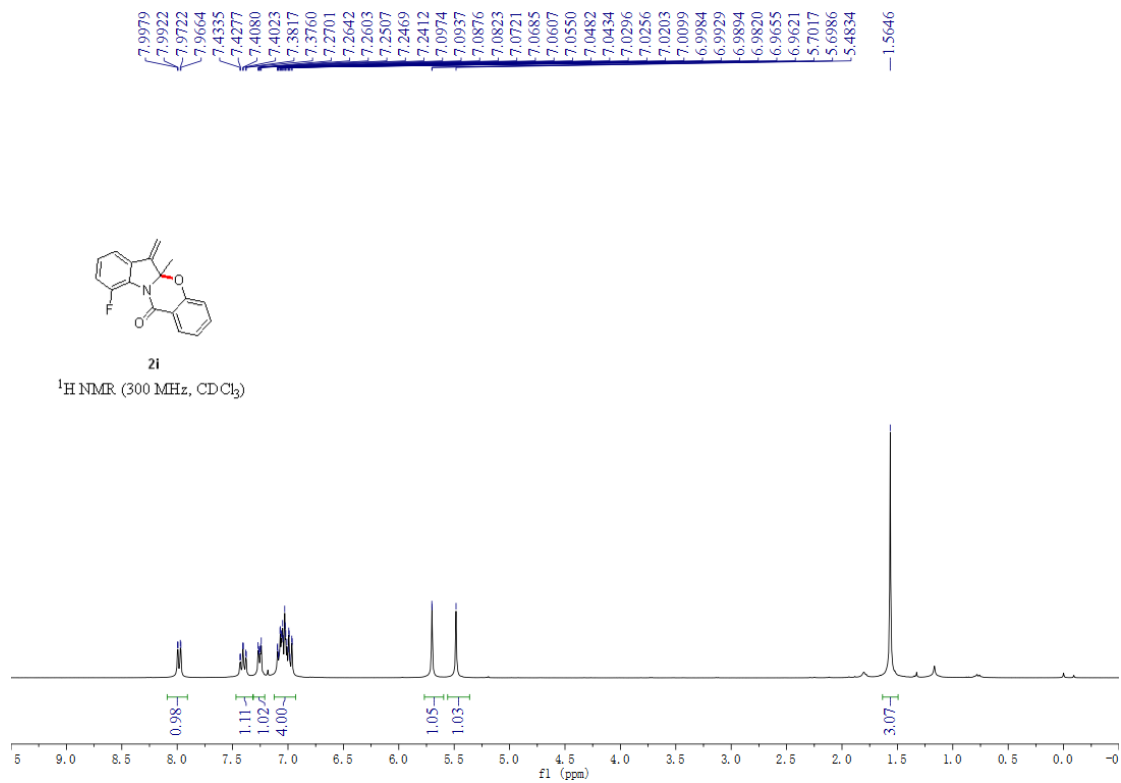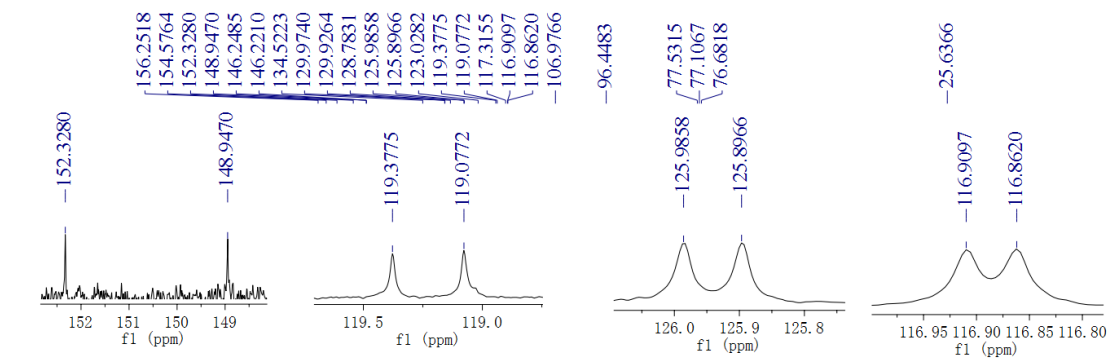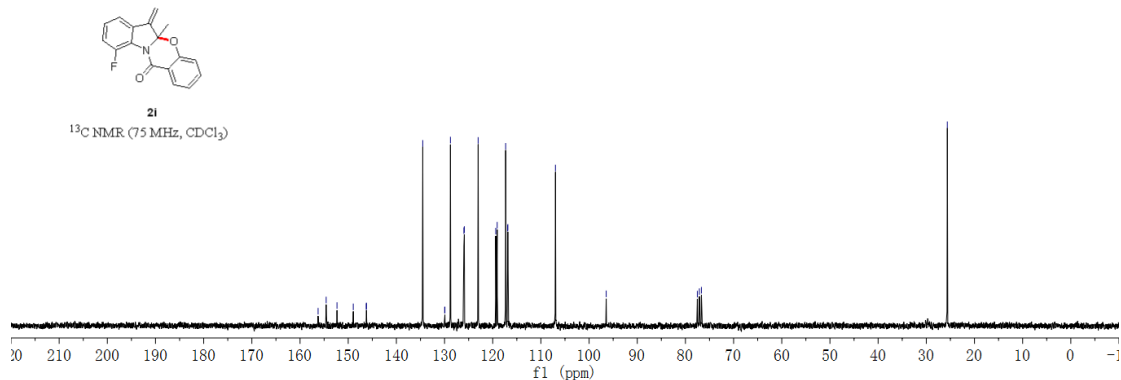

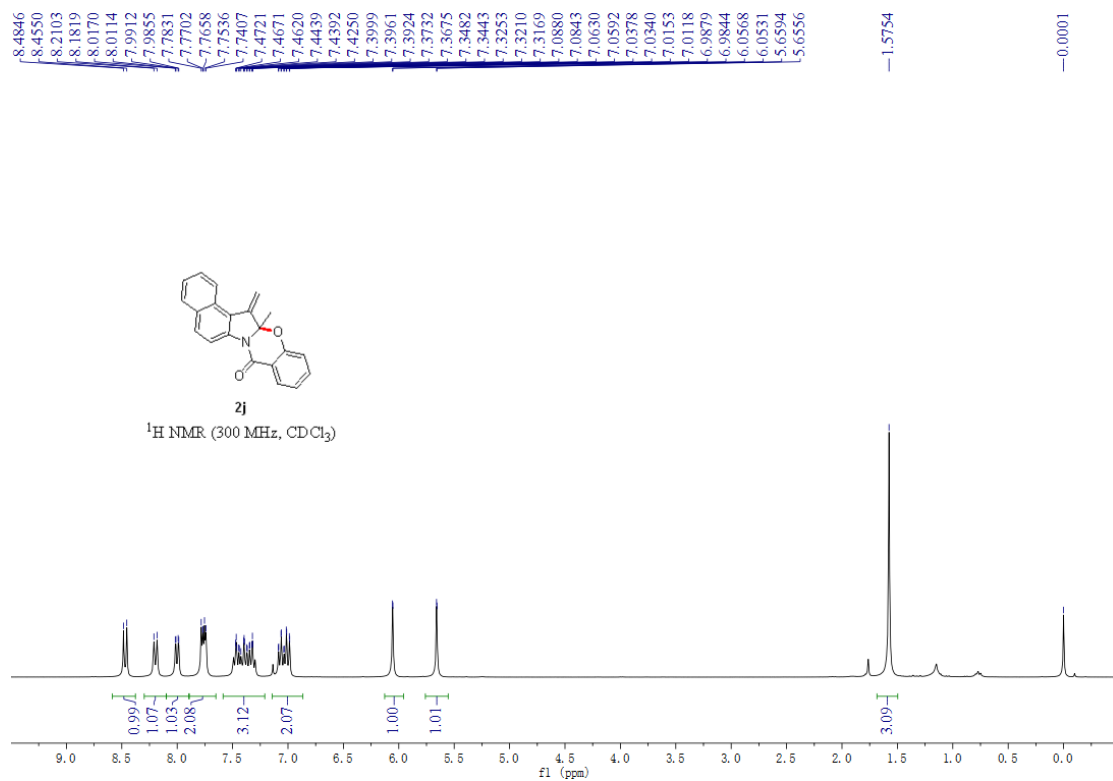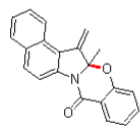

2j

<sup>1</sup>H NMR (300 MHz, CDCl<sub>3</sub>)

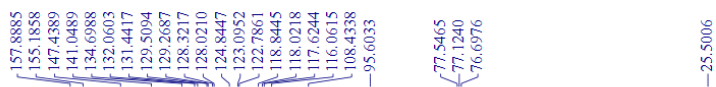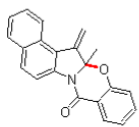

2j

<sup>13</sup>C NMR (75 MHz, CDCl<sub>3</sub>)



8.0508  
8.0249  
8.0001  
7.4874  
7.4617  
7.4419  
7.4194  
7.2770  
7.2520  
7.2254  
7.1401  
7.1147  
7.0985  
7.0895  
7.0742  
7.0493  
6.9949  
6.9676  
6.3642  
6.3500  
6.3359  
2.6493  
2.6128  
2.5781  
2.5606  
2.4567  
2.4354  
2.4116  
2.3906  
2.3691  
2.0250  
2.0079  
1.9956  
1.9786  
1.9644  
1.9498  
1.9332  
1.7458  
1.7265  
1.7019  
1.6782  
1.6556  
1.6225  
1.6052  
1.5781  
1.5608  
1.5335  
1.5162

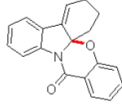

2k

<sup>1</sup>H NMR (300 MHz, CDCl<sub>3</sub>)

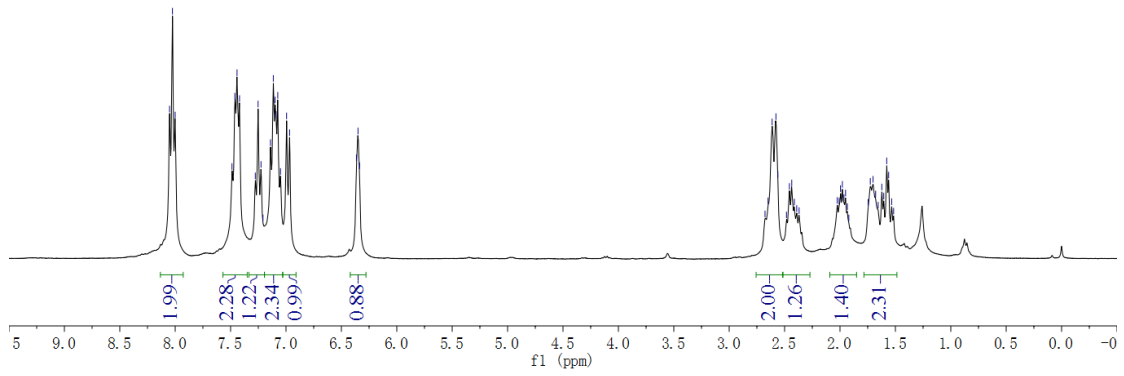

160.2313  
154.7173  
141.9056  
134.9503  
134.5244  
128.7466  
128.0543  
126.2850  
124.3493  
123.6418  
122.0776  
119.4660  
116.9462  
114.4395  
92.9786  
77.0602  
76.6375  
76.2123  
29.2117  
23.3431  
15.4315

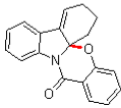

2k

<sup>13</sup>C NMR (75 MHz, CDCl<sub>3</sub>)

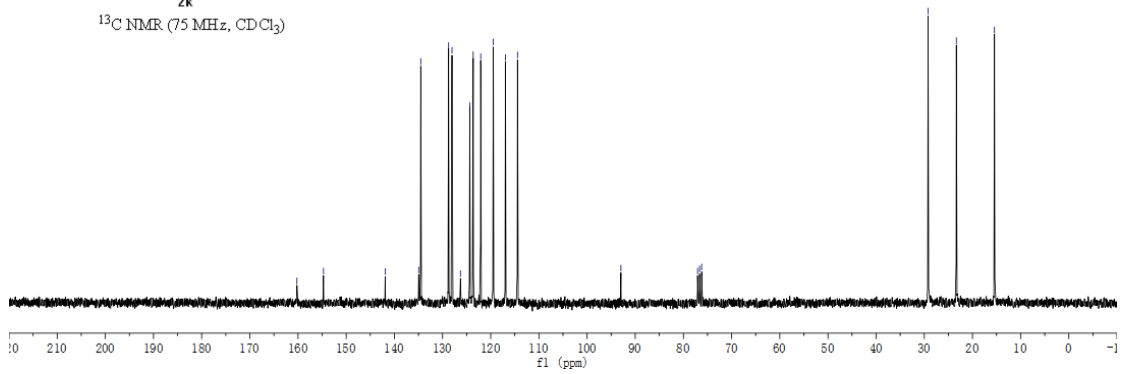

8.0586  
8.0319  
7.9450  
7.9210  
7.9156  
7.4202  
7.3946  
7.3690  
7.2972  
7.2717  
7.1813  
7.1563  
7.1300  
7.0629  
7.0376  
7.0260  
7.0127  
6.9975  
6.9696  
6.9445  
6.5644  
6.5467  
6.5335  
6.5159  
2.8684  
2.8587  
2.8505  
2.3901  
2.3780  
2.3683  
2.3450  
2.3333  
2.1970  
1.8261  
1.7938  
1.7803  
1.7576  
1.7410  
1.7223  
1.7127  
1.6712  
1.6549  
1.6405  
1.6292  
1.6037  
1.4452  
1.4039  
1.1648

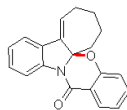

21

<sup>1</sup>H NMR (300 MHz, CDCl<sub>3</sub>)

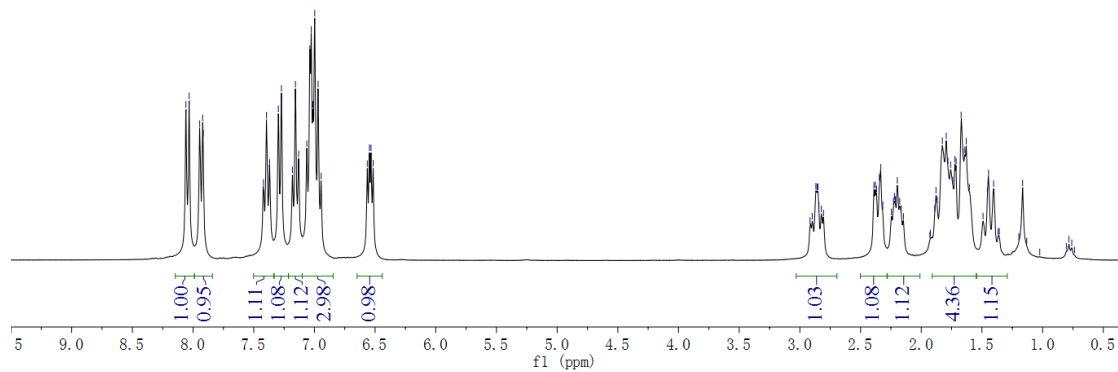

158.5893  
154.5671  
141.6277  
140.2600  
134.6748  
129.3415  
128.2074  
126.7263  
125.5689  
124.2744  
122.6668  
119.7256  
119.5748  
117.4611  
115.7276  
-97.9890  
77.5558  
77.1319  
76.7055  
32.8888  
27.8144  
26.4934  
26.3137

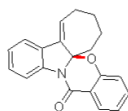

21

<sup>13</sup>C NMR (75 MHz, CDCl<sub>3</sub>)

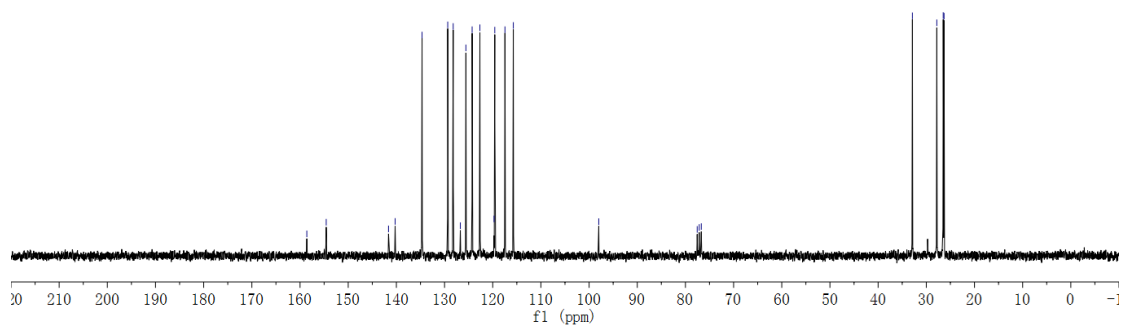

8.2643  
8.2376  
8.0902  
8.0646  
7.5419  
7.5160  
7.4952  
7.4721  
7.3426  
7.3171  
7.2906  
7.2810  
7.1974  
7.1724  
7.1483  
7.1274  
7.1016  
6.3765  
6.3520  
6.3400  
6.3161  
3.3332  
3.3143  
2.6323  
2.6073  
2.3705  
2.3540  
2.3425  
2.3266  
2.3266  
1.8568  
1.8324  
1.8093  
1.7720  
1.7526  
1.7330  
1.7188  
1.7055  
1.6940  
1.6754  
1.6536  
1.6212  
1.5887  
1.5791  
1.5632  
1.5403  
1.3342  
1.3113  
1.2887

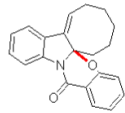

2m

<sup>1</sup>H NMR (300 MHz, CDCl<sub>3</sub>)

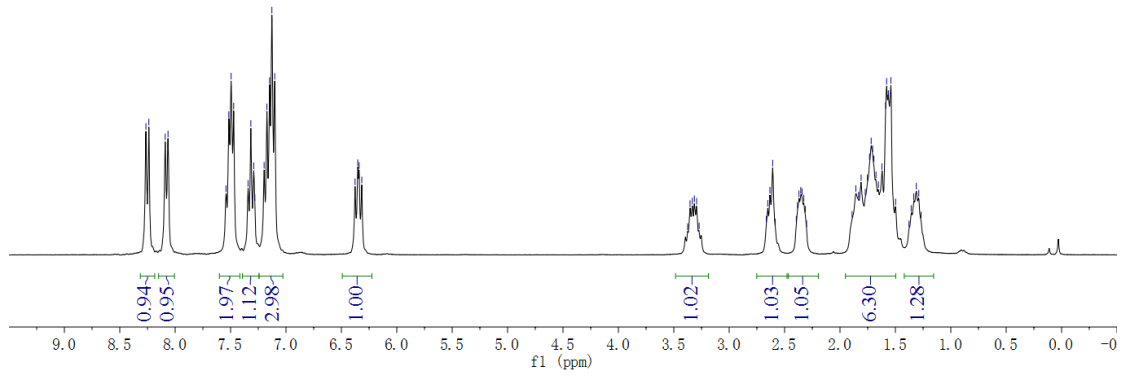

157.7852  
154.2545  
140.1324  
137.4620  
134.5308  
129.2822  
127.9578  
127.1883  
124.3320  
123.3201  
122.7019  
119.8554  
119.1010  
117.4987  
116.2843  
98.3120  
77.5584  
77.1374  
76.7096  
37.7276  
28.3899  
25.3532  
23.3261  
20.6043

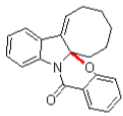

2m

<sup>13</sup>C NMR (75 MHz, CDCl<sub>3</sub>)

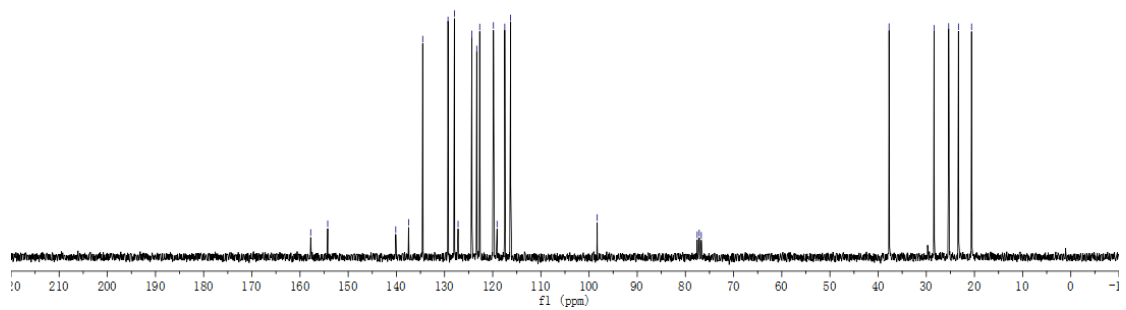

8.1940  
8.1911  
8.1661  
8.0957  
8.0690  
7.9470  
7.9416  
7.9211  
7.9156  
7.5181  
7.4925  
7.3498  
7.3439  
7.3241  
7.3182  
7.2980  
7.2922  
7.2653  
7.2615  
7.2392  
7.2355  
7.1892  
7.1849  
7.1634  
7.1582  
7.1533  
7.1401  
7.1321  
7.1279  
7.1063  
7.1020  
7.0275  
7.0237  
7.0142  
7.0020  
6.9982  
6.9892  
6.9767  
6.9733  
6.9641  
6.9544  
6.9510  
6.9295  
6.9258  
6.9140  
6.9044  
6.8877  
6.8790  
6.8756  
6.1122  
6.0872  
6.0115  
6.0115  
5.9868  
2.0237  
2.0070  
1.9986  
1.9823  
1.5495  
1.4445

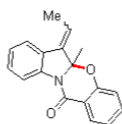

**2n**

<sup>1</sup>H NMR (300 MHz, CDCl<sub>3</sub>)

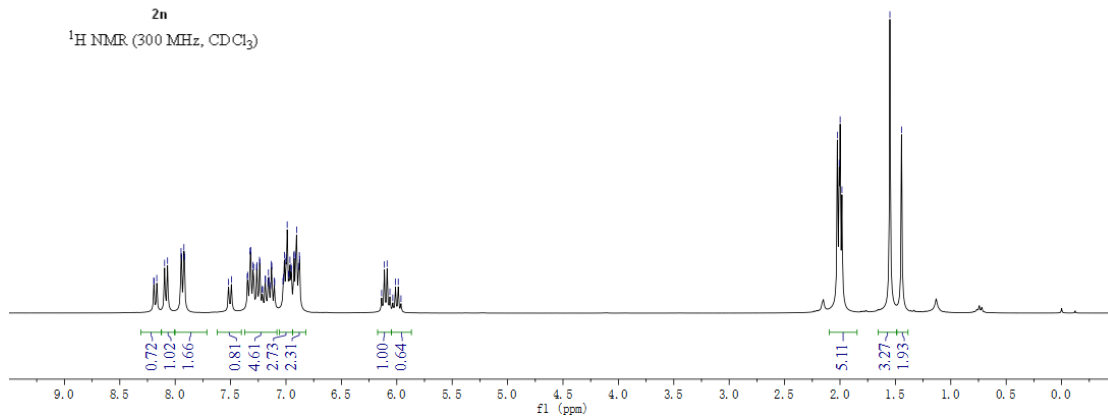

157.9527  
157.7114  
154.9884  
154.7853  
141.2264  
139.9031  
138.4807  
137.3535  
134.5953  
134.5486  
129.3146  
129.2260  
128.1614  
128.0590  
127.1720  
126.3026  
124.5886  
124.3839  
124.3054  
122.6841  
122.5878  
121.3282  
119.9867  
119.6799  
118.7657  
117.5926  
117.4838  
116.1170  
116.0889  
96.1134  
95.5796

77.6808  
77.2573  
76.8325

25.6537  
23.1329  
14.2496  
13.8548

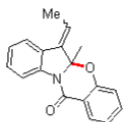

**2n**

<sup>13</sup>C NMR (75 MHz, CDCl<sub>3</sub>)

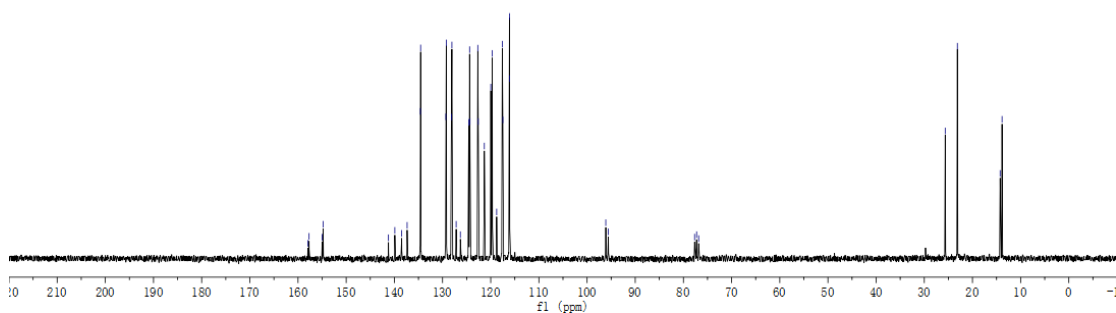

8.2335  
8.2297  
8.2066  
8.2028  
7.9571  
7.9512  
7.9313  
7.9254  
7.4656  
7.4395  
7.3640  
7.3582  
7.3381  
7.3325  
7.3123  
7.3064  
7.1638  
7.1597  
7.1378  
7.1340  
7.1121  
7.1079  
7.0297  
7.0260  
7.0046  
7.0002  
6.9950  
6.9793  
6.9745  
6.9697  
6.9484  
6.9444  
6.9142  
6.9109  
6.8873  
6.8839  
2.1472  
2.0483  
1.5394

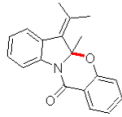

2o

<sup>1</sup>H NMR (300 MHz, CDCl<sub>3</sub>)

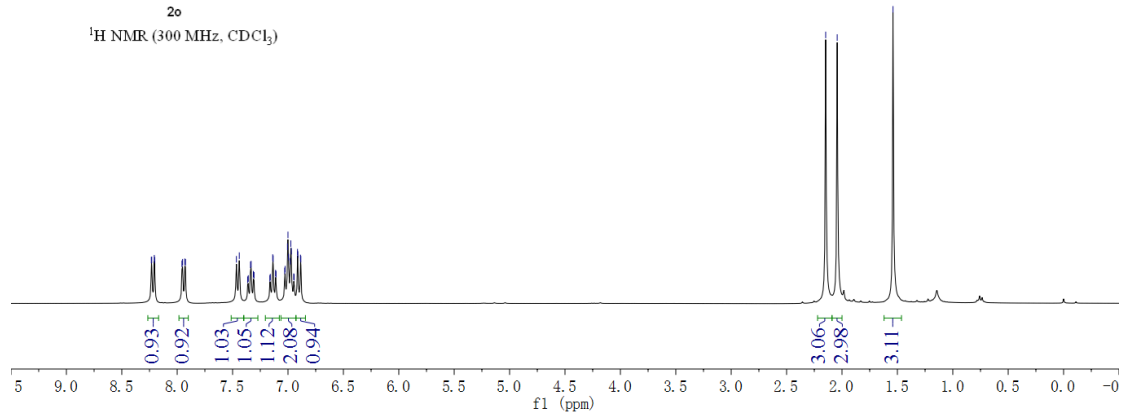

157.7536  
154.7264  
140.4687  
134.4532  
133.4201  
131.2114  
128.2224  
127.9664  
127.7909  
124.4320  
124.0905  
122.5880  
118.8908  
117.4948  
115.9402  
96.6379  
77.6218  
77.1951  
76.7711  
23.2577  
23.0711  
22.9918

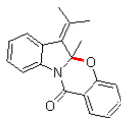

2o

<sup>13</sup>C NMR (75 MHz, CDCl<sub>3</sub>)

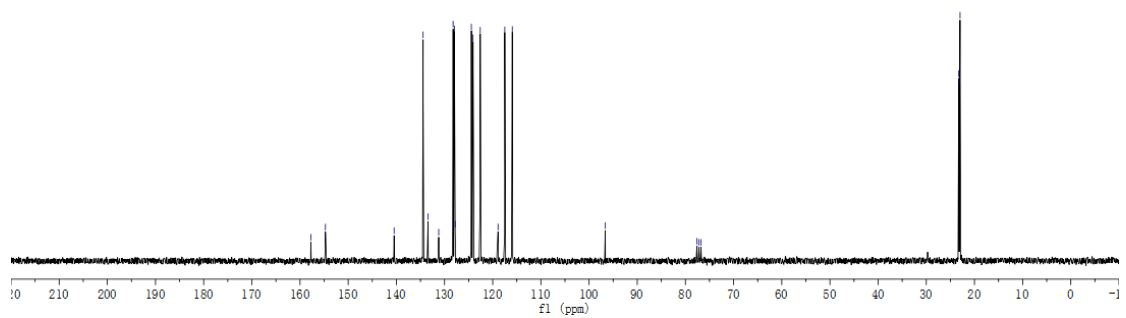

8.1489  
8.1220  
7.9792  
7.9728  
7.9534  
7.9469  
7.4521  
7.4261  
7.4144  
7.4091  
7.3894  
7.3698  
7.3635  
7.3572  
7.2895  
7.2636  
7.2375  
7.0713  
7.0522  
7.0450  
7.0283  
7.0050  
6.9796  
6.9524  
5.7256  
5.4420  
2.0462  
2.0407  
2.0196  
1.9997  
1.9945  
1.9750  
1.9697  
1.9462  
1.9233  
1.9179  
1.8988  
1.8935  
1.8726  
1.8519  
1.8465  
1.8258  
-0.7142  
-0.7087  
-0.6896  
-0.6840  
-0.6647  
-0.6592

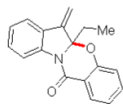

2p

<sup>1</sup>H NMR (300 MHz, CDCl<sub>3</sub>)

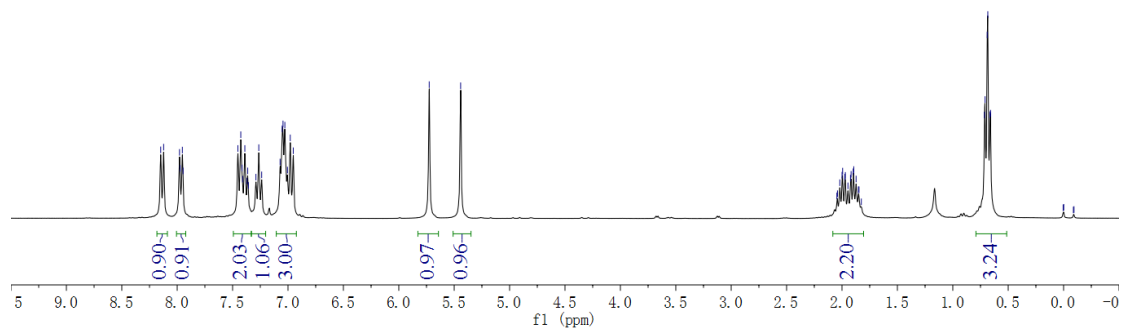

157.9471  
154.9502  
144.4807  
142.0107  
134.6764  
130.6478  
128.1997  
126.6258  
124.3686  
122.6549  
120.6307  
118.7896  
117.4256  
115.9581  
106.7559  
97.8343  
77.5363  
77.1161  
76.6925  
30.7756  
7.0845

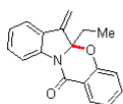

2p

<sup>13</sup>C NMR (75 MHz, CDCl<sub>3</sub>)

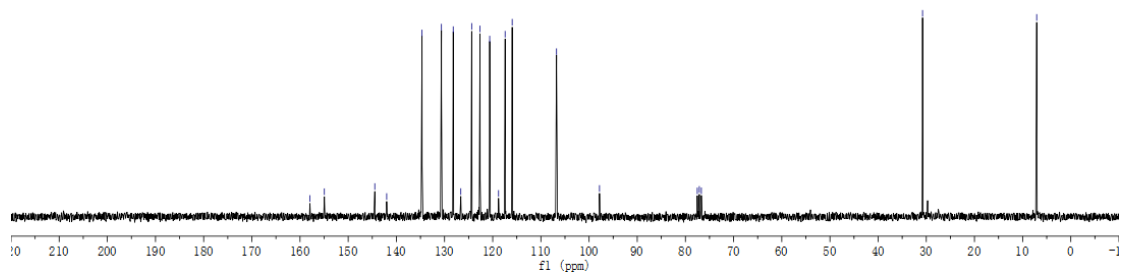

8.3269  
8.3000  
7.8684  
7.8626  
7.8424  
7.8366  
7.4469  
7.4215  
7.4069  
7.3933  
7.3823  
7.3666  
7.3597  
7.3522  
7.3413  
7.3335  
7.3272  
7.3174  
7.1896  
7.1843  
7.1725  
7.1664  
7.1549  
7.1353  
7.1290  
7.1141  
7.1009  
7.0868  
7.0751  
6.9895  
6.9645  
6.9396  
5.6905  
5.5789

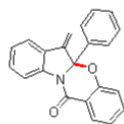

**2q**

$^1\text{H NMR}$  (300 MHz,  $\text{CDCl}_3$ )

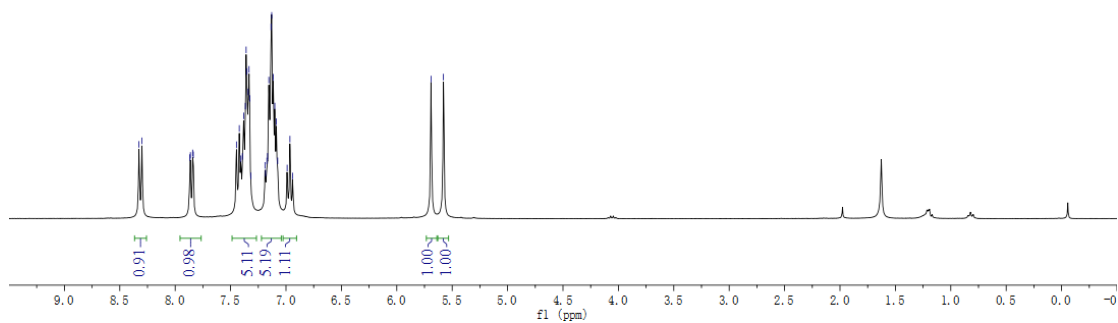

158.7221  
155.4160  
146.4899  
142.5667  
140.5607  
134.6703  
130.9253  
128.8058  
128.7056  
128.2851  
125.5480  
124.9095  
124.7357  
122.9238  
121.4662  
119.6848  
117.6614  
115.5102  
107.4450  
-96.7247  
77.4755  
77.0521  
76.6289

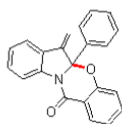

**2q**

$^{13}\text{C NMR}$  (75 MHz,  $\text{CDCl}_3$ )

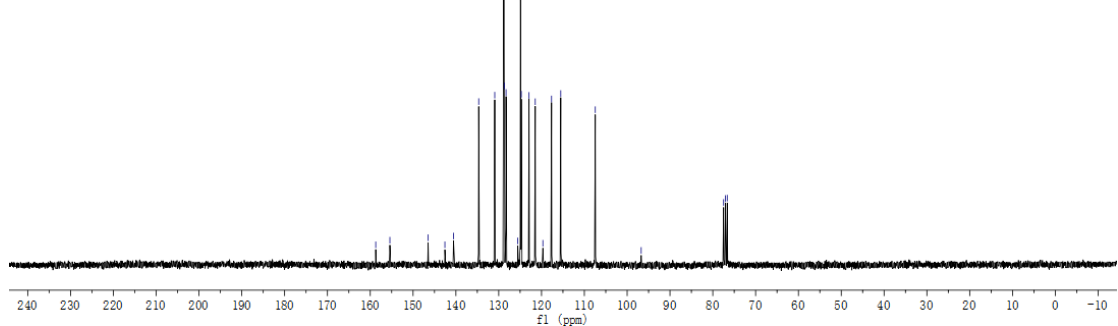

8.1357  
8.1088  
7.8590  
7.8327  
7.4346  
7.2950  
7.2699  
7.2430  
7.0568  
7.0315  
7.0065  
6.8795  
6.8530  
6.7927  
5.6624  
5.4275

2.2900

1.5556

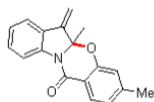

2r

<sup>1</sup>H NMR (300 MHz, CDCl<sub>3</sub>)

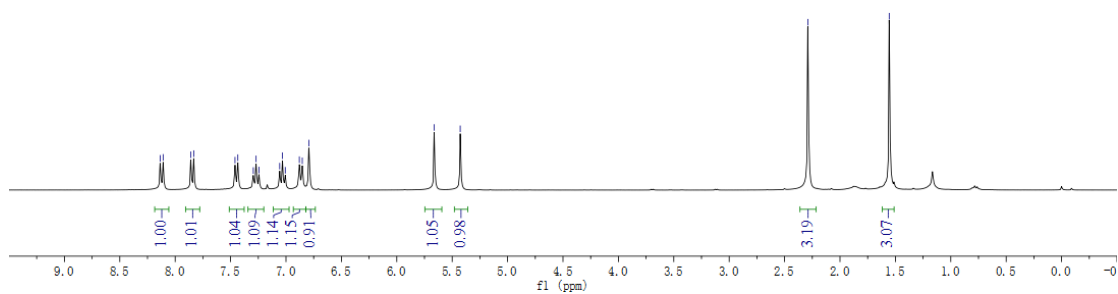

158.1009  
155.1188  
146.7253  
145.9371  
130.7024  
128.0909  
125.7577  
124.2218  
124.0245  
123.8194  
120.9655  
120.2069  
117.8213  
116.1975  
105.7353

95.3703

77.4713  
77.0411  
76.6226

25.3961  
21.8047

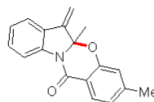

2r

<sup>13</sup>C NMR (75 MHz, CDCl<sub>3</sub>)

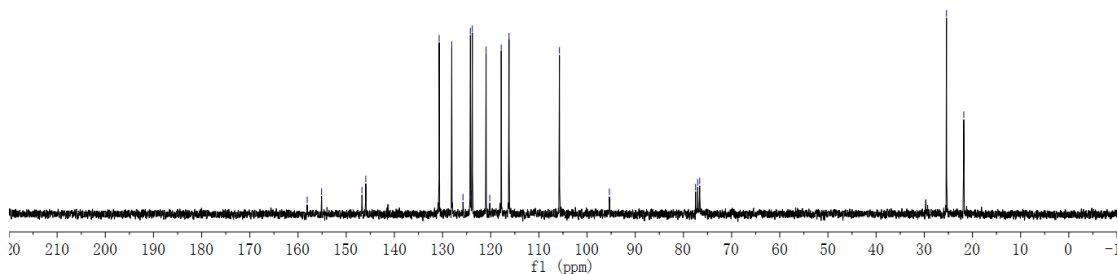



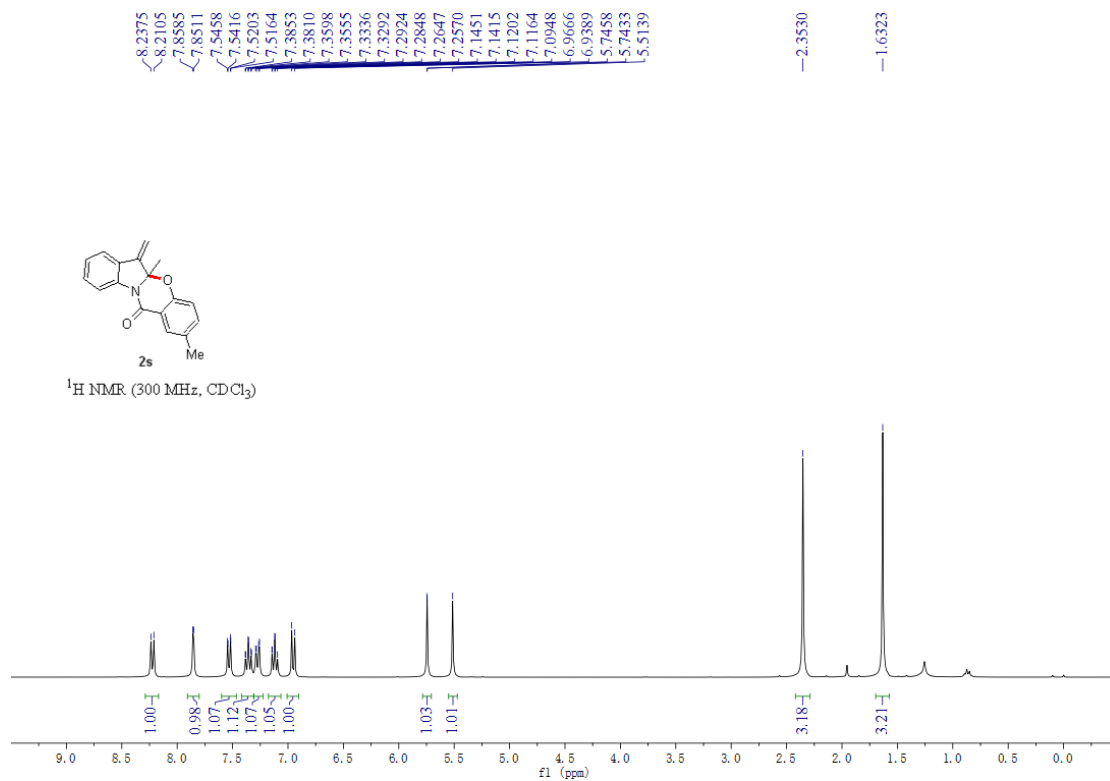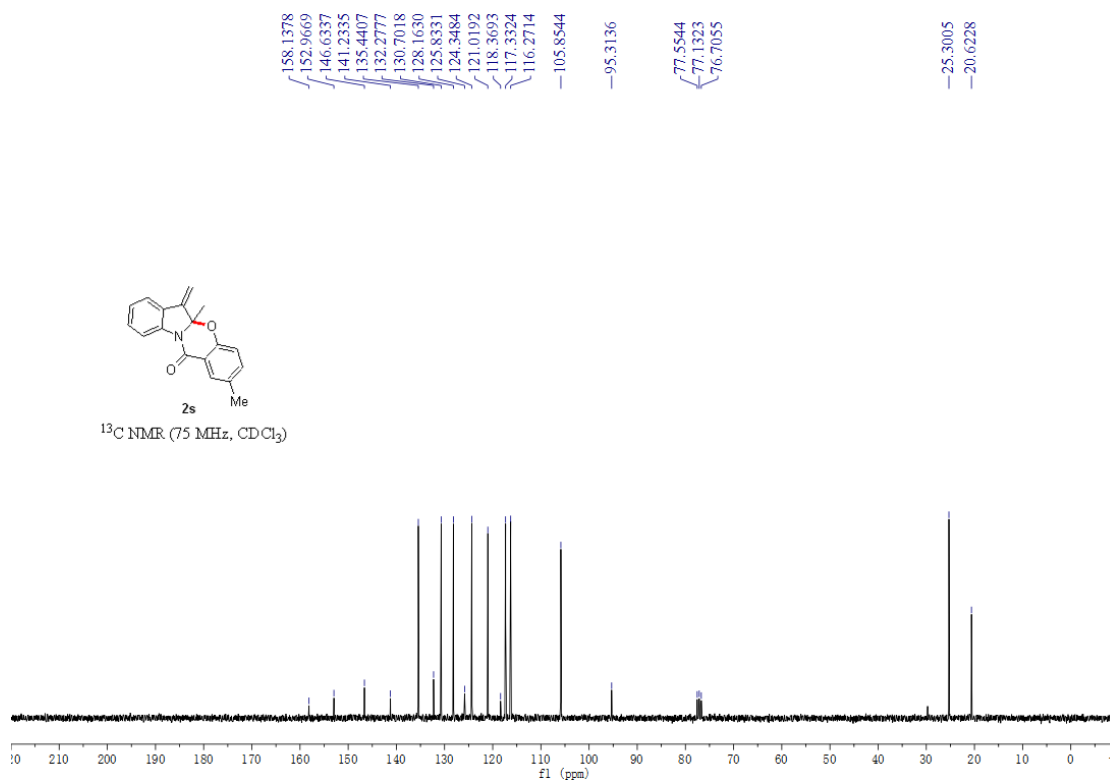

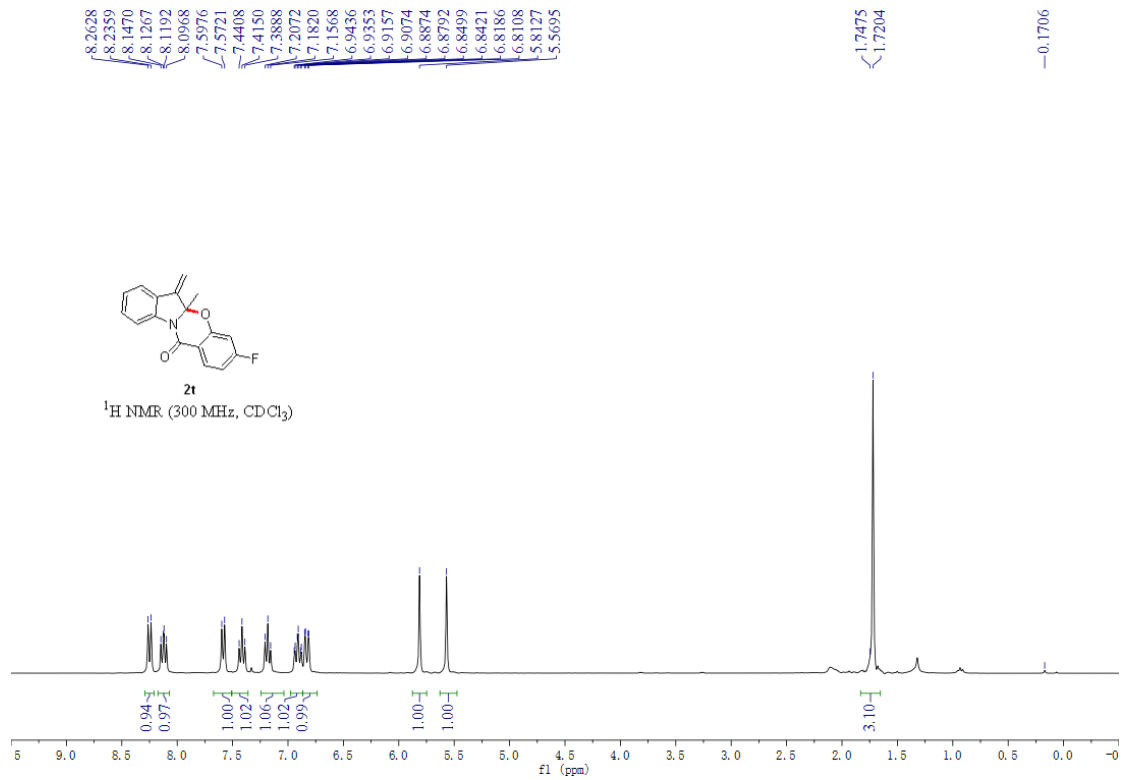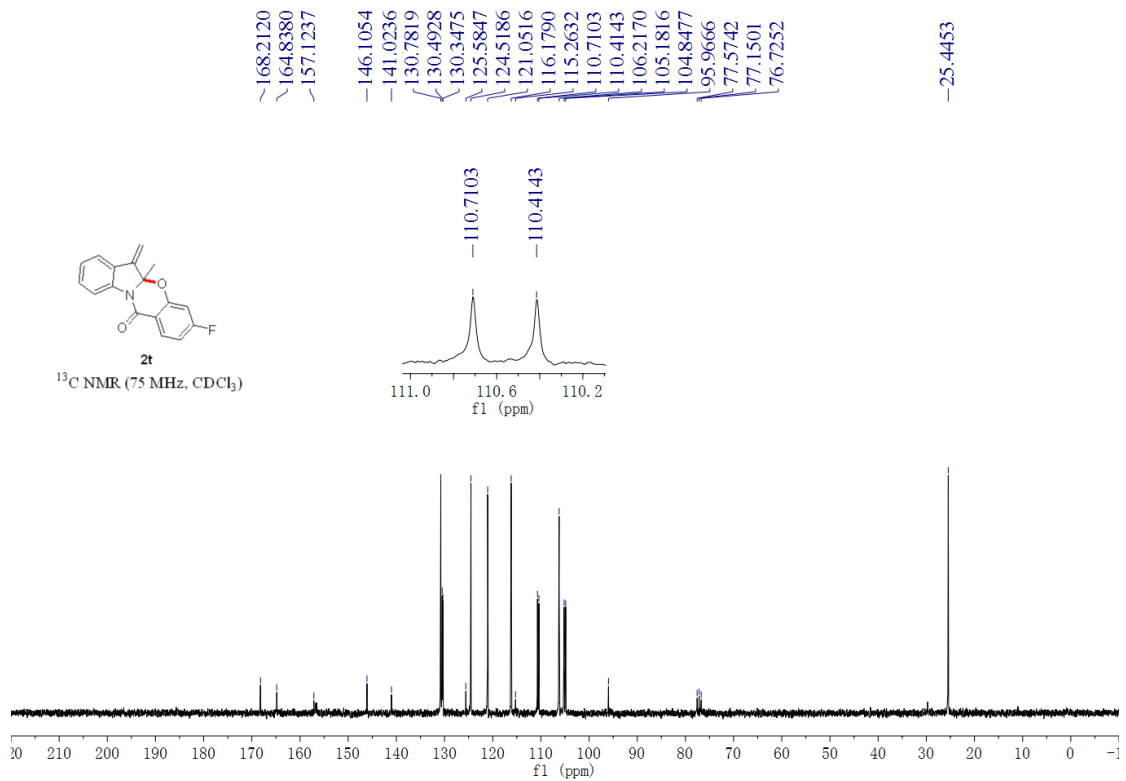

8.2109  
8.1838  
8.0316  
8.0228  
7.5718  
7.5677  
7.5465  
7.5425  
7.4600  
7.4511  
7.4312  
7.4222  
7.4127  
7.4082  
7.3873  
7.3830  
7.3609  
7.3566  
7.1910  
7.1874  
7.1659  
7.1622  
7.1407  
7.1371  
7.0440  
7.0150  
5.7837  
5.5376  
5.5347

1.6604

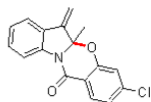

**2u**

<sup>1</sup>H NMR (300 MHz, CDCl<sub>3</sub>)

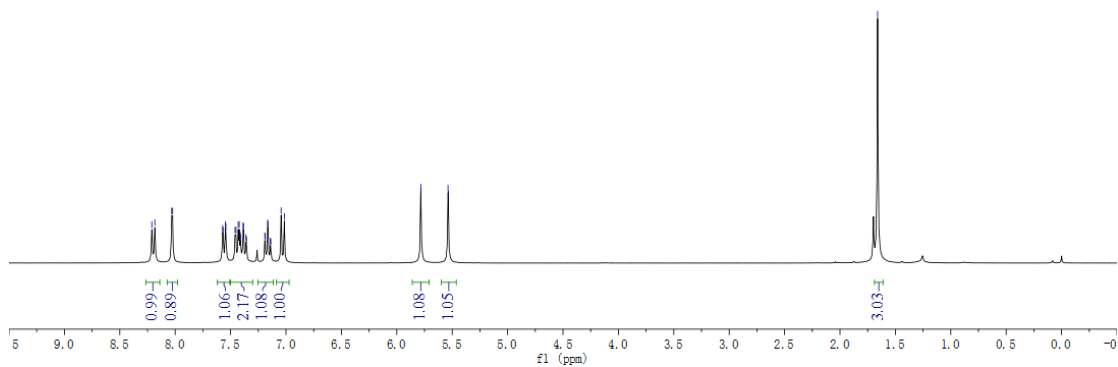

153.5217  
146.1448  
140.8647  
134.4927  
130.8298  
128.1329  
127.8701  
125.7535  
124.7416  
121.0826  
119.9146  
119.1064  
116.3431  
106.2407

95.7206

77.4655  
77.0428  
76.6186

25.3930

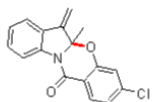

**2u**

<sup>13</sup>C NMR (75 MHz, CDCl<sub>3</sub>)

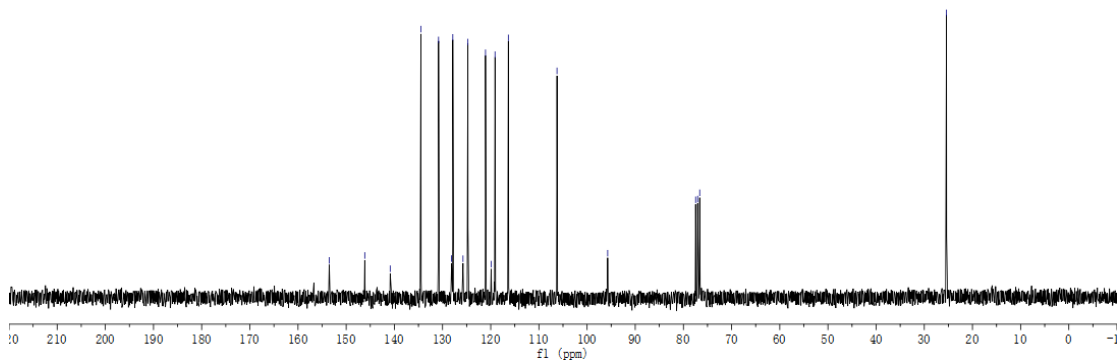

8.1083  
8.0813  
7.8347  
7.8077  
7.4561  
7.4522  
7.4304  
7.4265  
7.2998  
7.2741  
7.2699  
7.2477  
7.2433  
7.2124  
7.2064  
7.1791  
7.0721  
7.0685  
7.0469  
7.0435  
7.0216  
5.6669  
5.6642  
5.4161

-1.5617

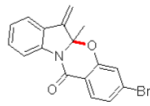

2v

<sup>1</sup>H NMR (300 MHz, CDCl<sub>3</sub>)

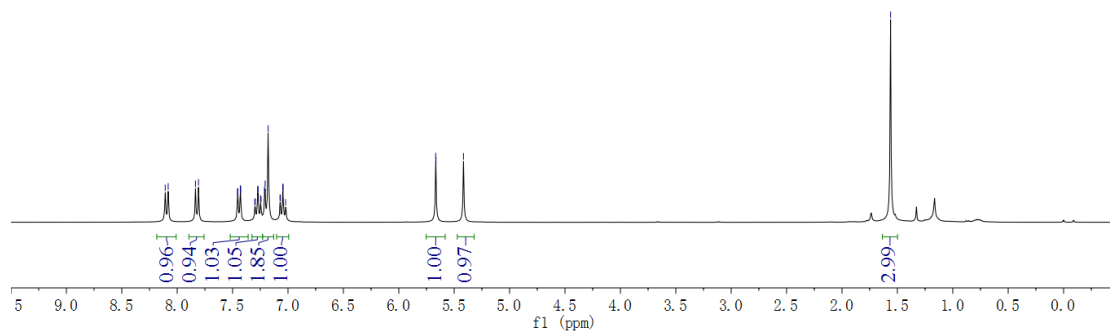

157.1613  
155.4956  
146.1000  
140.9610  
130.8037  
129.4701  
128.5975  
126.2481  
125.6778  
124.6202  
121.0597  
120.8921  
117.7504  
116.2602  
106.2341

-95.8776

77.5031  
77.0806  
76.6581

-25.5107

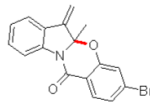

2v

<sup>13</sup>C NMR (75 MHz, CDCl<sub>3</sub>)

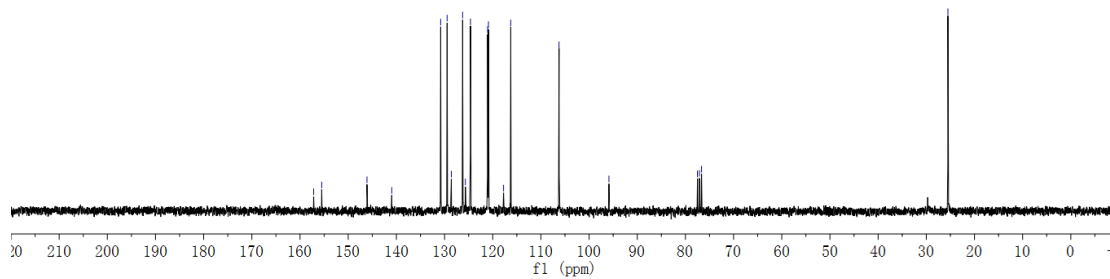

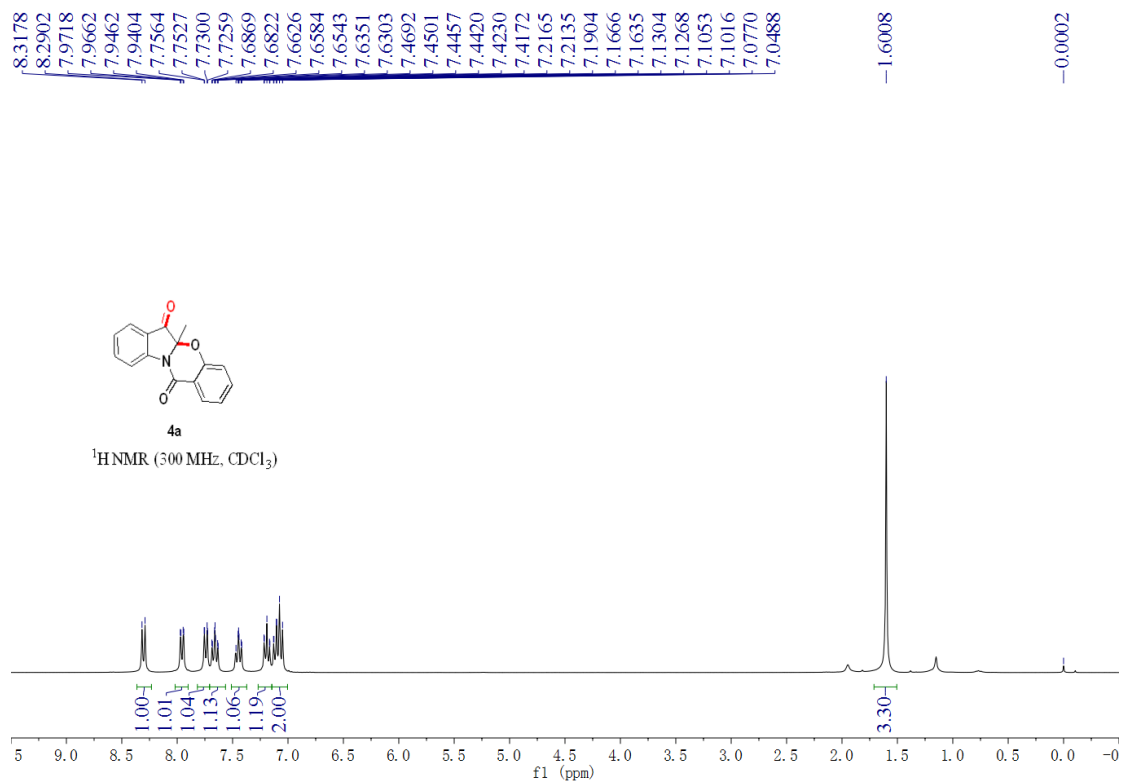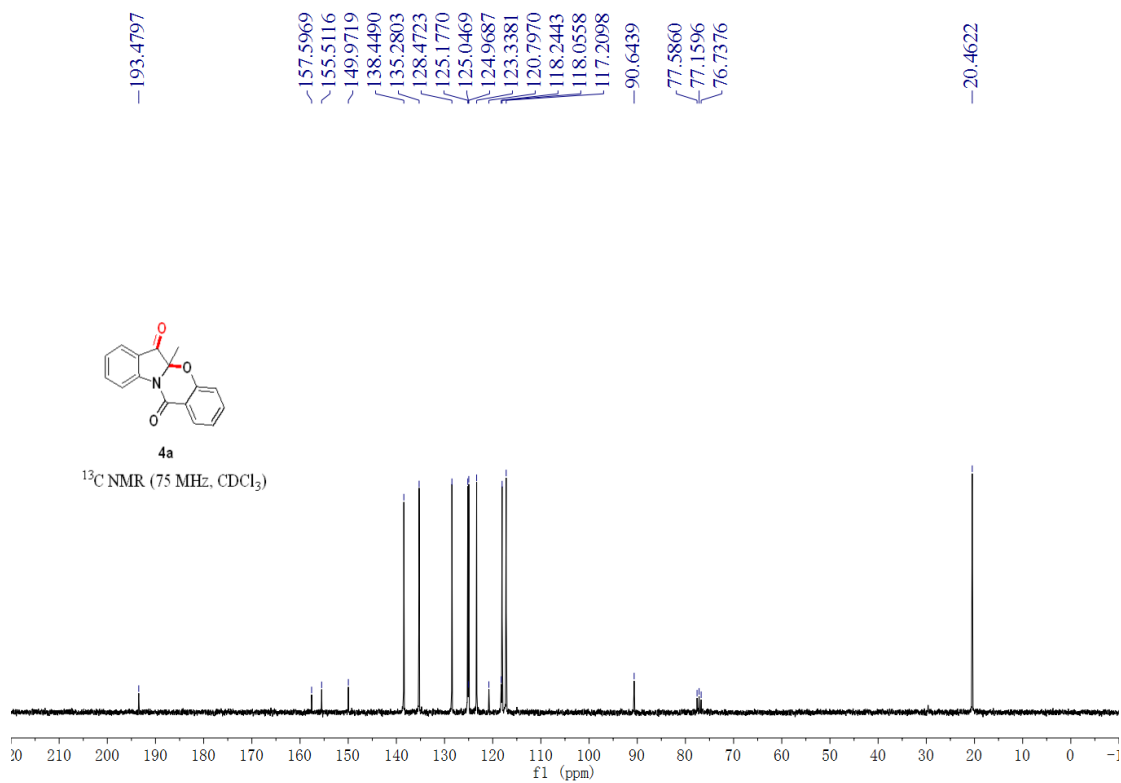

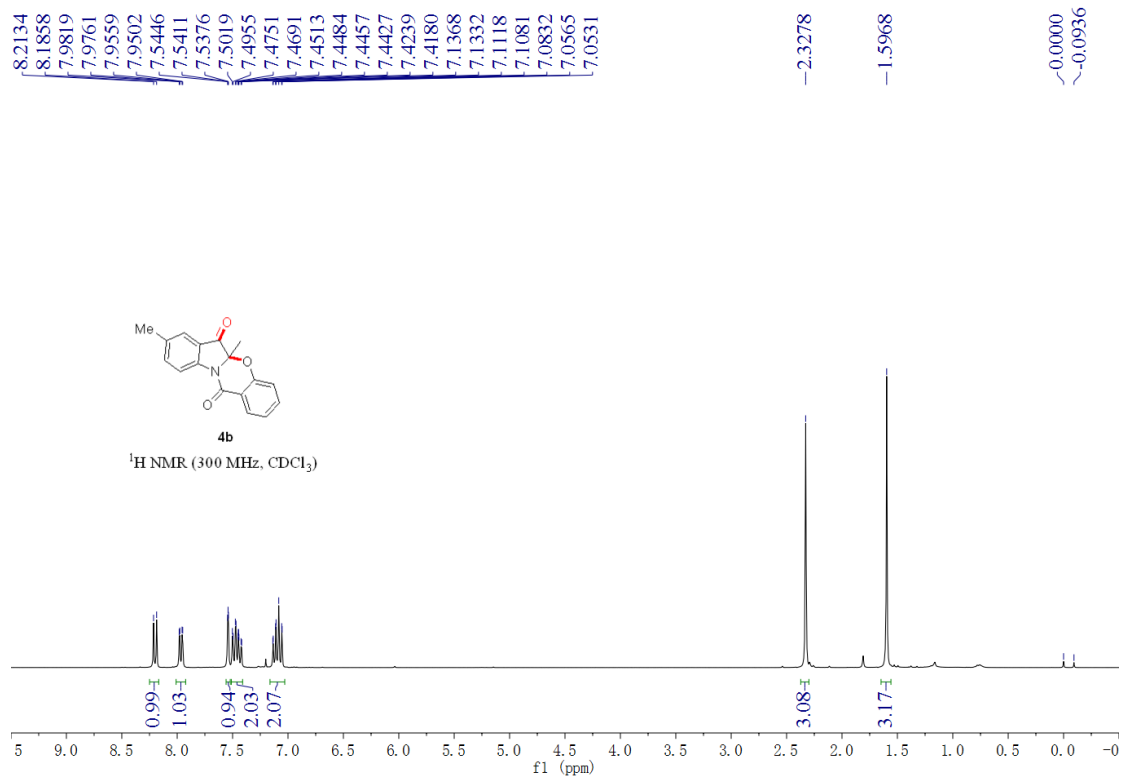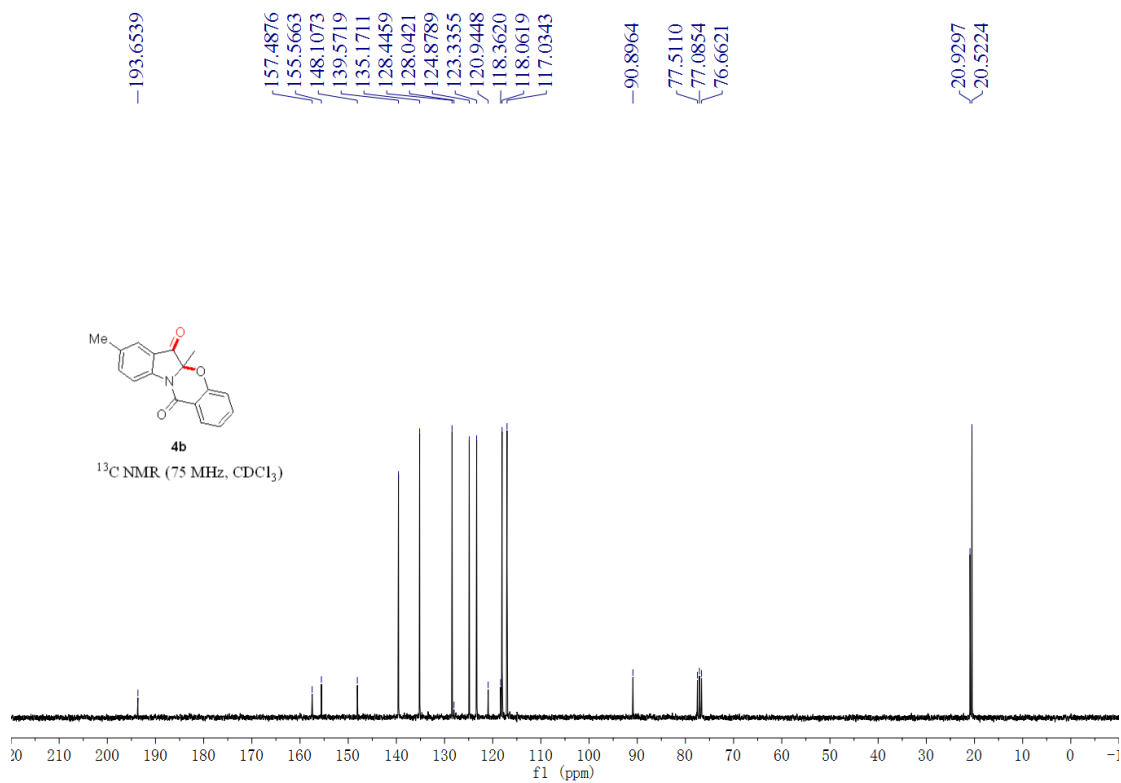

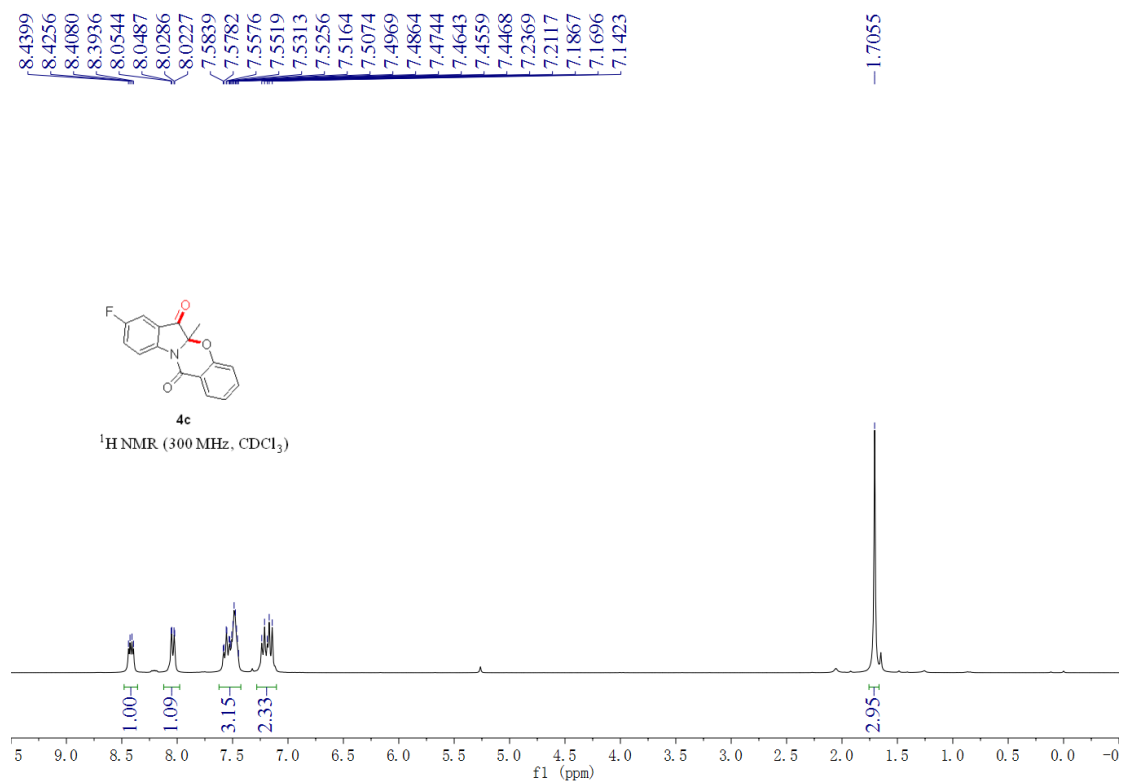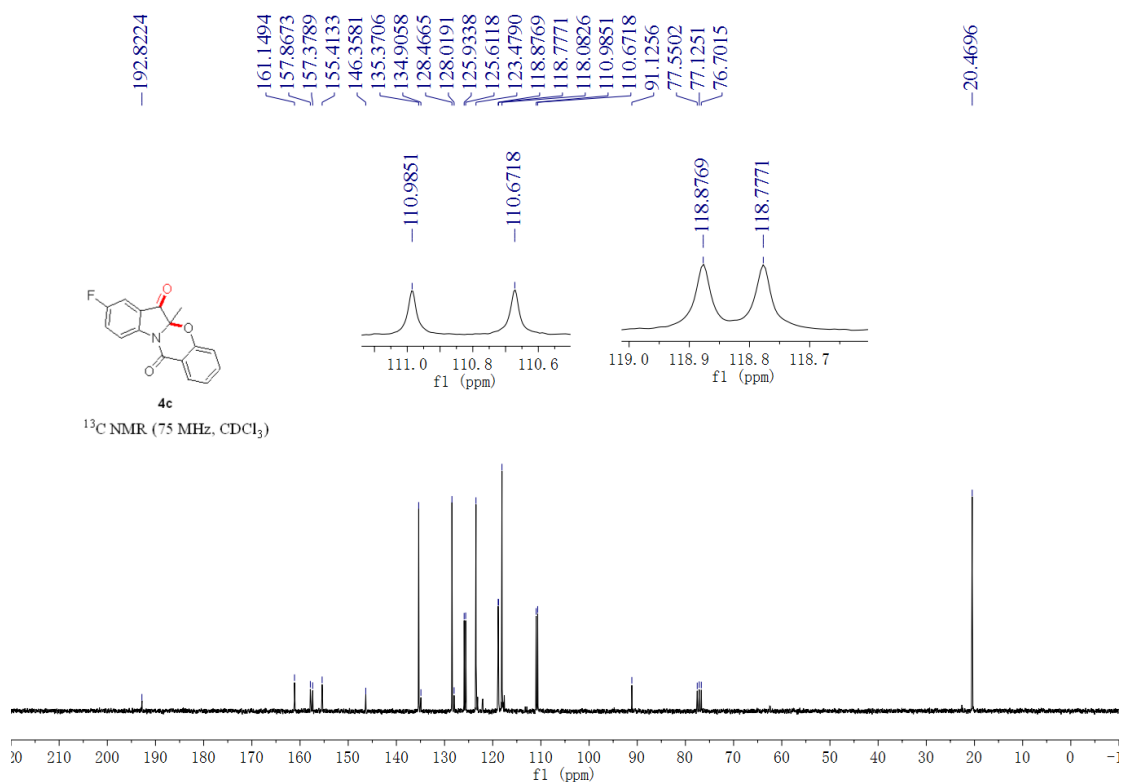

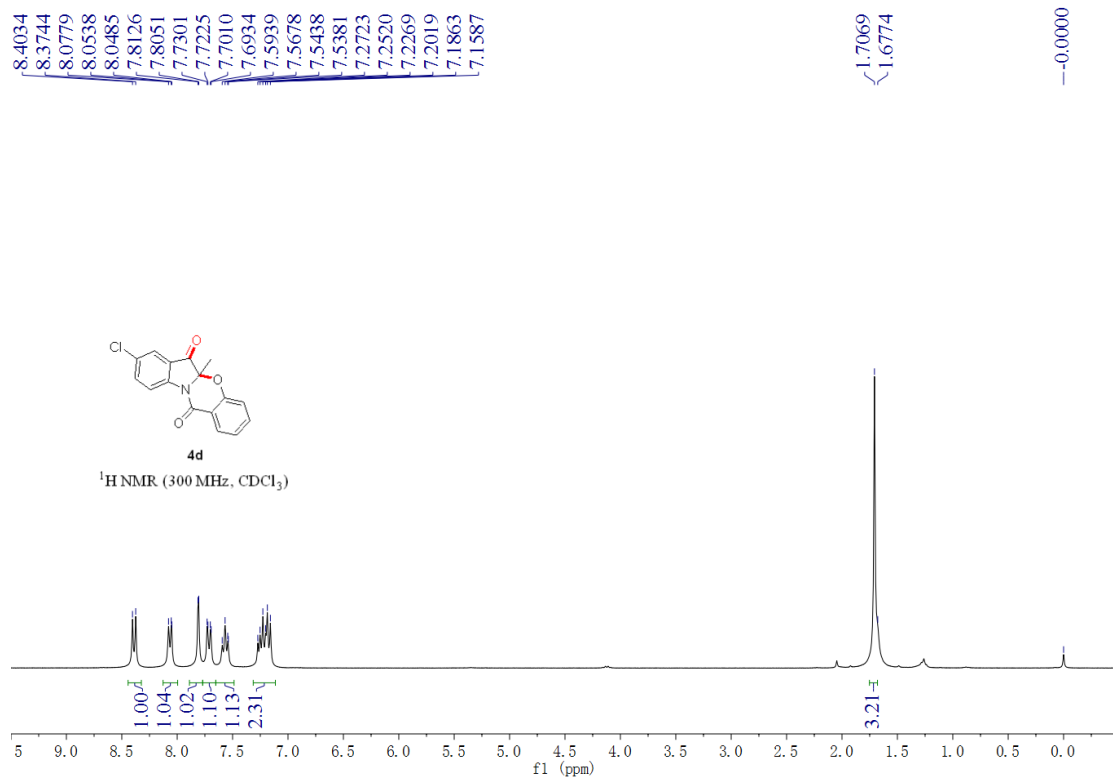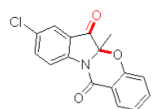

4d

<sup>1</sup>H NMR (300 MHz, CDCl<sub>3</sub>)

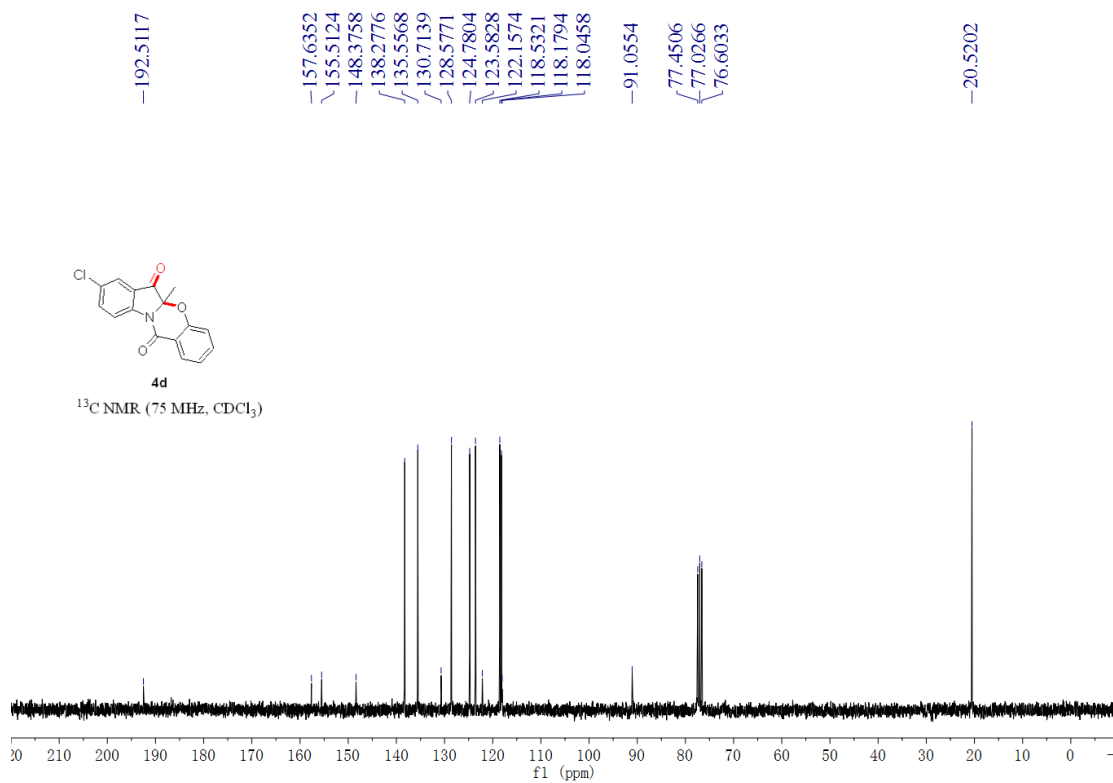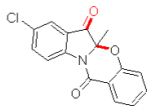

4d

<sup>13</sup>C NMR (75 MHz, CDCl<sub>3</sub>)



8.5888  
8.5616  
7.9608  
7.9552  
7.9348  
7.9291  
7.8236  
7.8189  
7.7946  
7.7825  
7.7677  
7.7568  
7.5745  
7.5621  
7.5496  
7.5423  
7.4647  
7.4589  
7.4379  
7.4322  
7.4129  
7.4071  
7.3021  
7.2752  
7.2608  
7.2521  
7.2392  
7.1988  
7.1714  
7.0875  
7.0624  
7.0372

0.0905  
0.0000

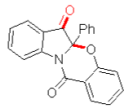

4e

<sup>1</sup>H NMR (300 MHz, CDCl<sub>3</sub>)

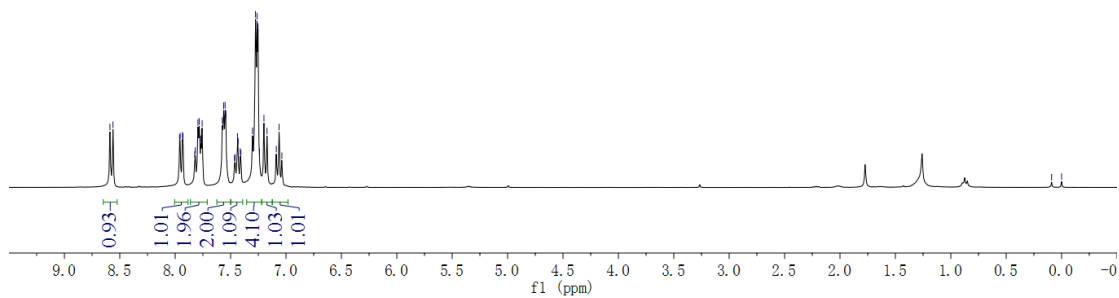

191.4072  
158.4446  
155.8645  
150.9461  
138.5117  
135.2454  
133.6118  
129.8807  
129.0041  
128.4277  
126.4685  
125.9203  
125.3315  
123.4604  
120.7203  
119.2226  
118.1138  
116.6809  
92.2226  
77.4991  
77.0747  
76.6502

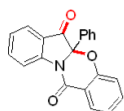

4e

<sup>13</sup>C NMR (75 MHz, CDCl<sub>3</sub>)

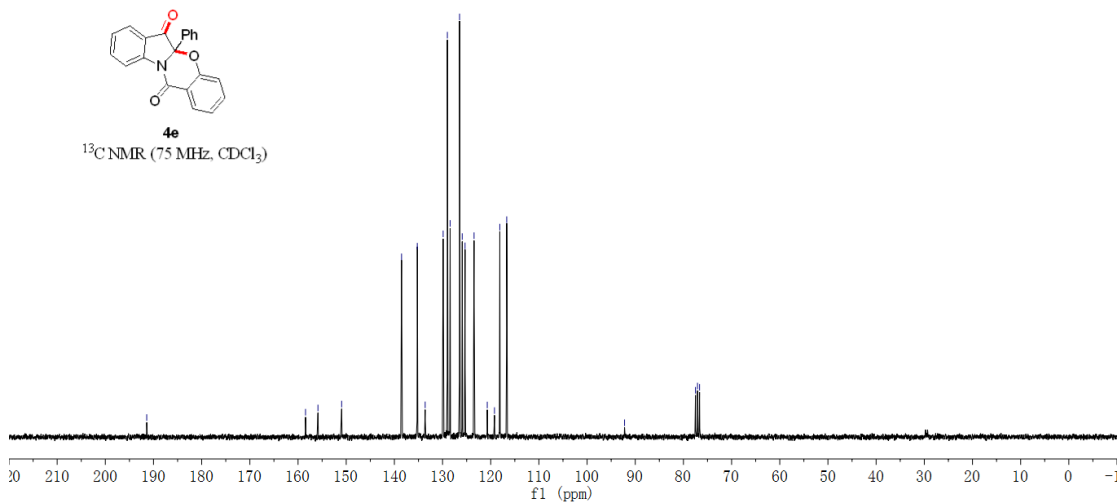

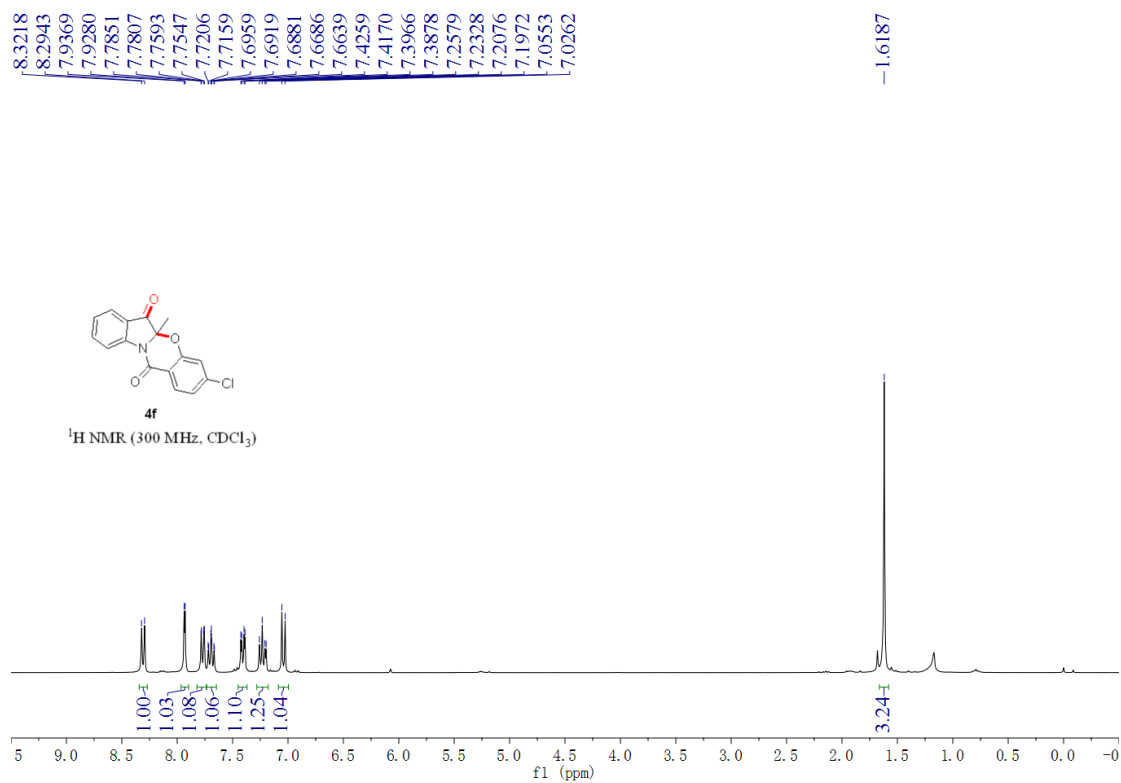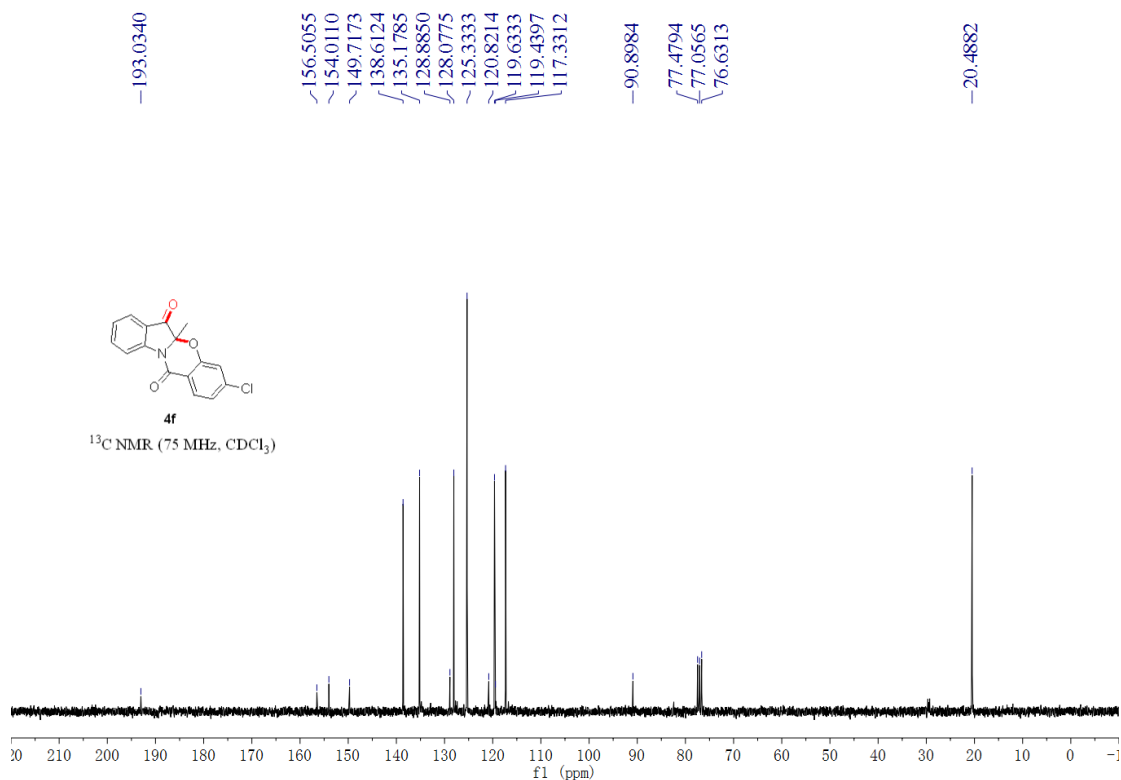

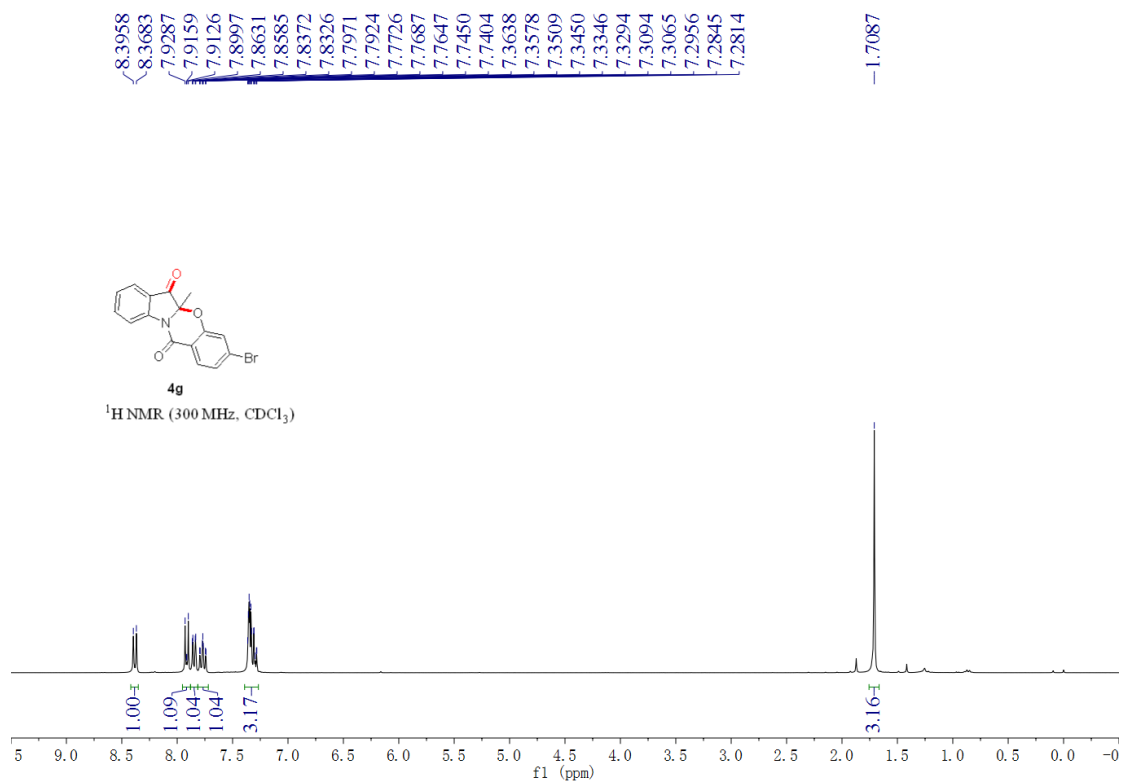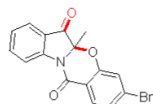

4g

<sup>1</sup>H NMR (300 MHz, CDCl<sub>3</sub>)

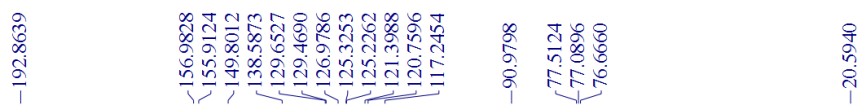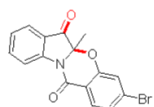

4g

<sup>13</sup>C NMR (75 MHz, CDCl<sub>3</sub>)

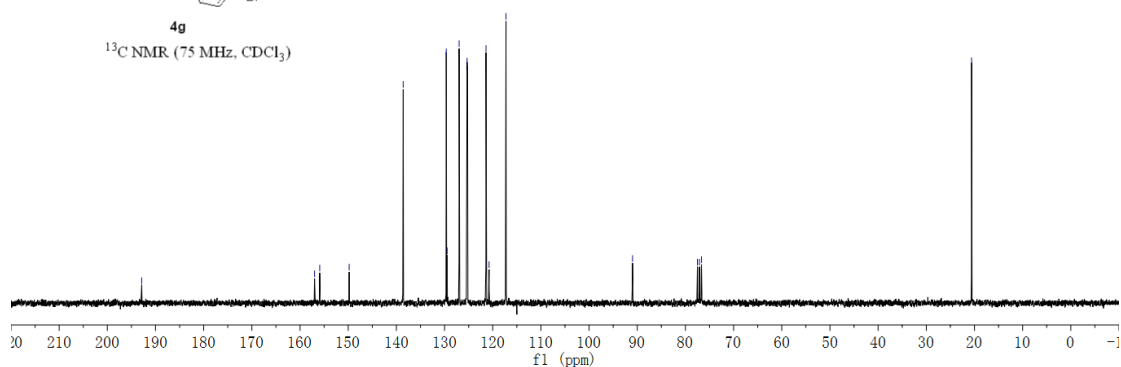

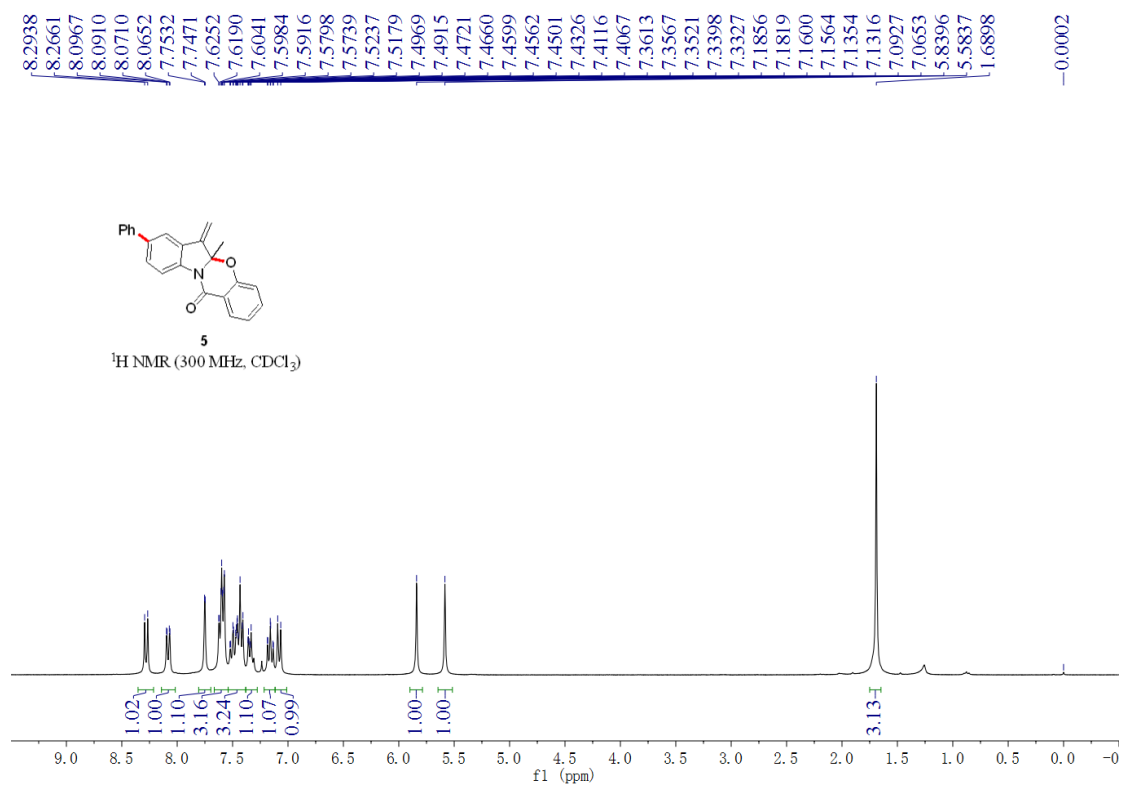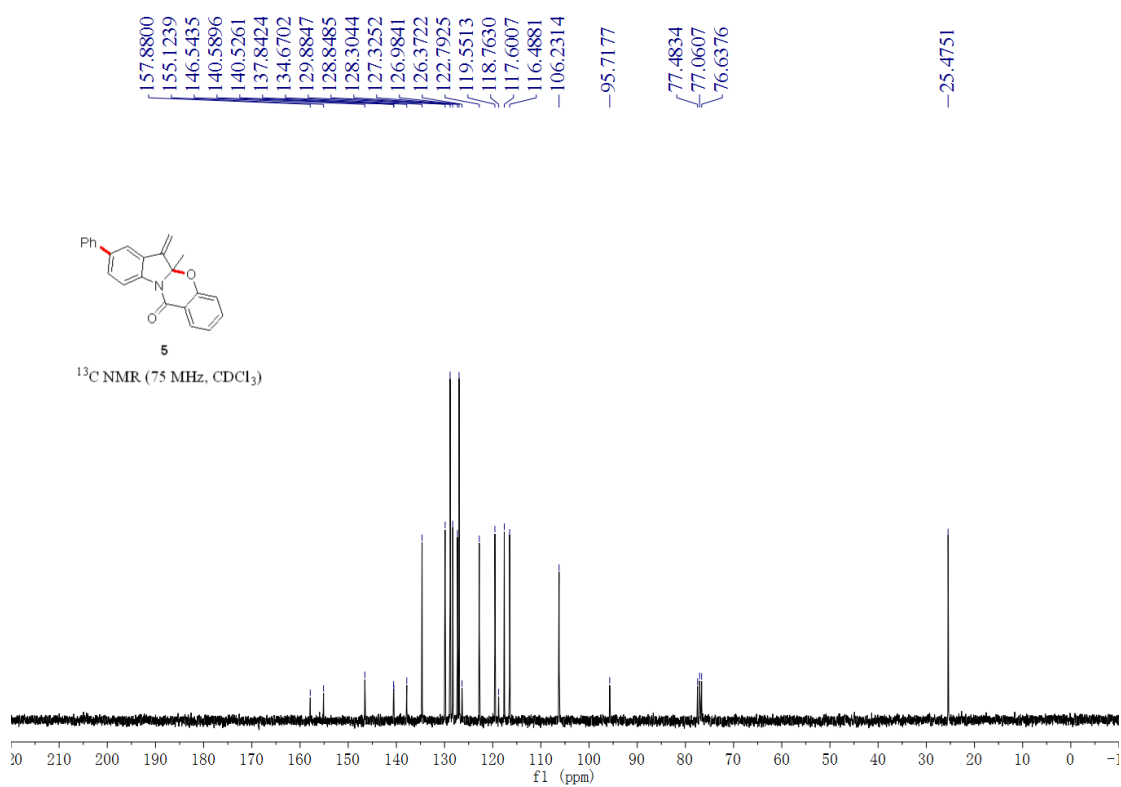

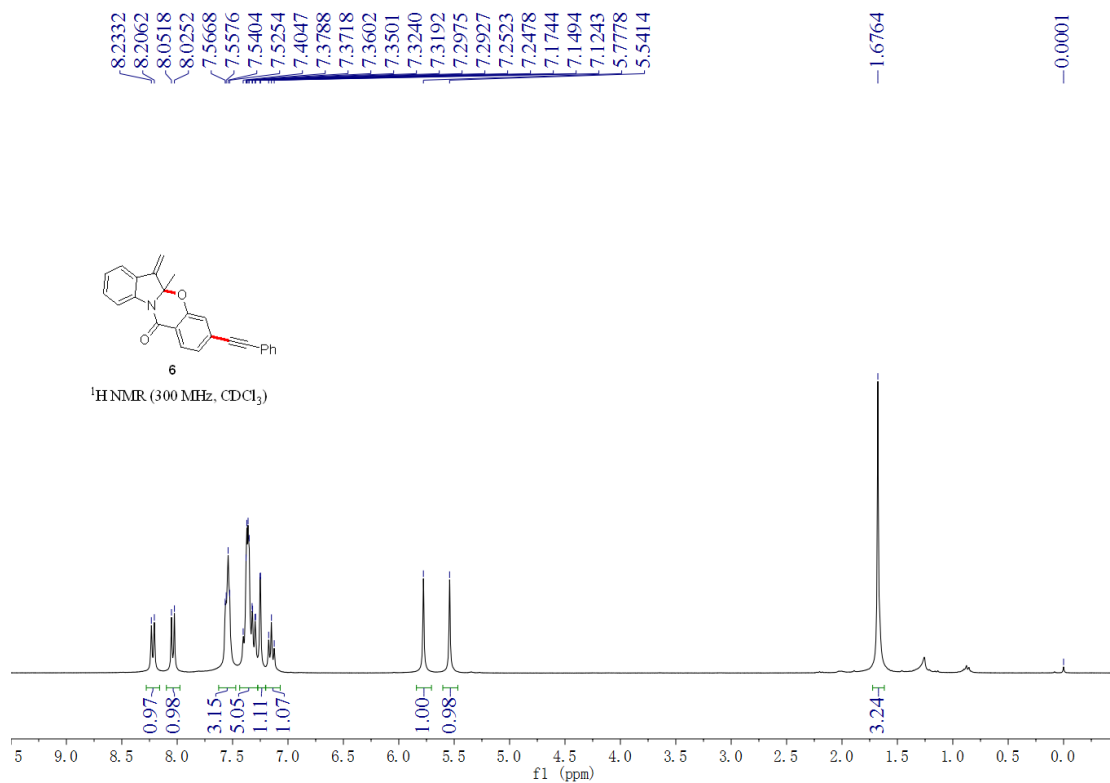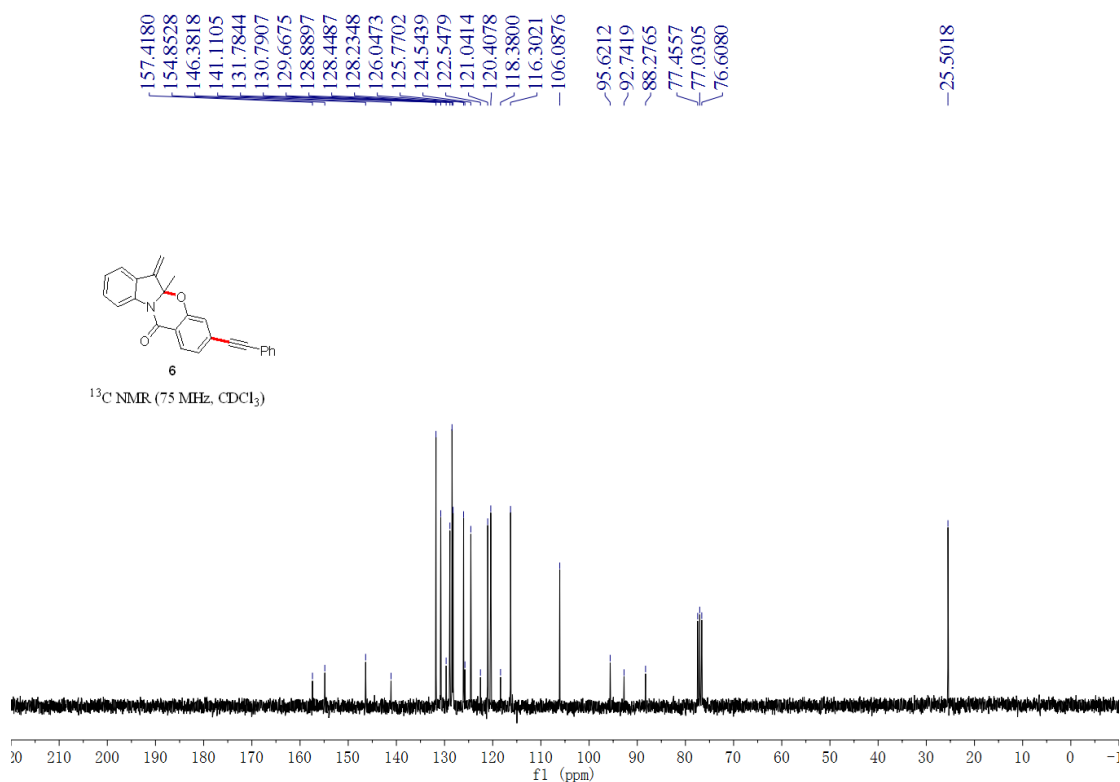

Supplement: c6qo00698a1.pdf [file c6qo00698a1.pdf]
